# Supplementary material for: FeII/III and MnII complexes based on 2,4,6-tris(2-pyridyl)-triazine: synthesis, structures, magnetic and biological properties
Source: Royal Society of Chemistry journal article supplement (doi:10.1039/d2ra04868j), 2022-01-01
Supplement: d2ra04868j1.pdf [file d2ra04868j1.pdf]

## Electronic Supplementary Information

### **Fe<sup>II/III</sup> and Mn<sup>II</sup> complexes based on 2,4,6-tris(2-pyridyl)-triazine: Synthesis, structures, magnetic and biological properties**

Mariana Darii,<sup>a</sup> Annabel Mikosch,<sup>b</sup> Jan van Leusen,<sup>b</sup> Victor Ch. Kravtsov,<sup>a</sup> Elena G. Dvornina,<sup>c</sup> Steliana T. Clapco,<sup>c</sup> Alexandra Ciloci,<sup>c</sup> Paul Kögerler<sup>\*,‡</sup> and Svetlana G. Baca<sup>\*,†</sup>

*<sup>a</sup>Institute of Applied Physics, Academiei 5, MD2028 Chisinau, R. Moldova*

*<sup>b</sup>Institute of Inorganic Chemistry, RWTH Aachen University, Landoltweg 1, 52074  
Aachen, Germany*

*<sup>c</sup>Institute of Microbiology and Biotechnology, Academiei 1, MD2028 Chisinau, R.  
Moldova.*

The following data were retrieved from the Cambridge Structural Database (CSD version 5.41, December 2020).

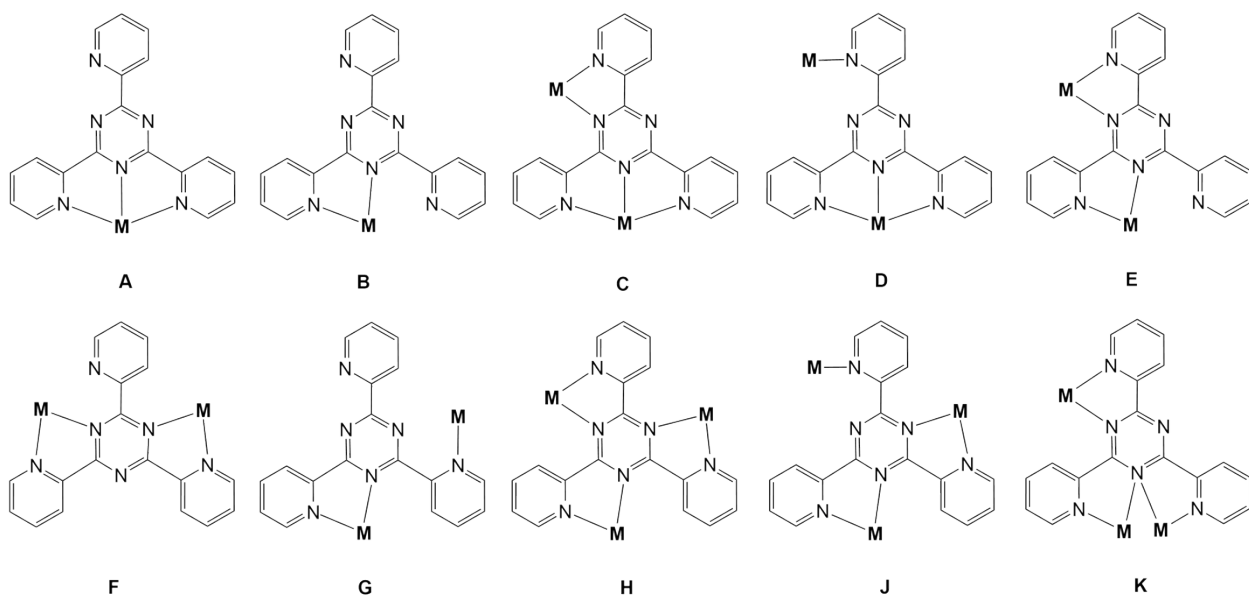

**Table S1.** Coordination modes displayed by the tpt ligand in its metal complexes.

| N  | CSD code | Compound                                                                         | Coordination mode | References                                                                                                                                                                                                            | Metal ion |
|----|----------|----------------------------------------------------------------------------------|-------------------|-----------------------------------------------------------------------------------------------------------------------------------------------------------------------------------------------------------------------|-----------|
| 1  | ABEZUD   | [Ru(tpt)(PPh <sub>3</sub> ) <sub>2</sub> (Cl)]BF <sub>4</sub> ·H <sub>2</sub> O  | A                 | S. Sharma, M. Chandra, D.S. Pandey, <i>Eur. J. Inorg. Chem.</i> , 2004, 3555, DOI: <a href="https://doi.org/10.1002/ejic.200400069">10.1002/ejic.200400069</a>                                                        | Ru(II)    |
| 2  | ABIBAP   | [Ru(tpt)(AsPh <sub>3</sub> ) <sub>2</sub> (Cl)]BF <sub>4</sub> ·H <sub>2</sub> O | A                 |                                                                                                                                                                                                                       | Ru(II)    |
| 3  | ABIBET   | [Ru(tpt)(PPh <sub>3</sub> )(dtc)]Cl·H <sub>2</sub> O                             | A                 |                                                                                                                                                                                                                       | Ru(II)    |
| 4  | ACOKIN   | [Mn(tpt)(N <sub>3</sub> ) <sub>2</sub> ] <sub>n</sub>                            | A                 | A. Das, G.M. Rosair, M.S. El Fallah, J. Ribas, S. Mitra, <i>Inorg. Chem.</i> , 2006, <b>45</b> , 3301, DOI: <a href="https://doi.org/10.1021/ic052088t">10.1021/ic052088t</a>                                         | Mn(II)    |
| 5  | ACUGIP   | [La(tpt)(NO <sub>3</sub> ) <sub>3</sub> (MeOH) <sub>2</sub> ]                    | A                 | S.A. Cotton, V. Franckevicius, M.F. Mahon, Li Ling Ooi, P.R. Raithby, S.J. Teat, <i>Polyhedron</i> , 2006, <b>25</b> , 1057, DOI: <a href="https://doi.org/10.1016/j.poly.2005.12.012">10.1016/j.poly.2005.12.012</a> | La(III)   |
| 6  | ACUGOV   | [La(tpt)(NO <sub>3</sub> ) <sub>3</sub> (H <sub>2</sub> O)]·acetone              | A                 |                                                                                                                                                                                                                       | La(III)   |
| 7  | ACUGUB   | [Y(tpt)(NO <sub>3</sub> ) <sub>3</sub> (H <sub>2</sub> O)]·EtOH                  | A                 |                                                                                                                                                                                                                       | Y(III)    |
| 8  | ACUHAI   | [La(tpt)(NO <sub>3</sub> ) <sub>3</sub> (H <sub>2</sub> O)]·EtOH                 | A                 |                                                                                                                                                                                                                       | La(III)   |
| 9  | ACUHEM   | [Ce(tpt)(NO <sub>3</sub> ) <sub>3</sub> (H <sub>2</sub> O)]·EtOH                 | A                 |                                                                                                                                                                                                                       | Ce(III)   |
| 10 | ACUHIQ   | [Pr(tpt)(NO <sub>3</sub> ) <sub>3</sub> (H <sub>2</sub> O)]·EtOH                 | A                 |                                                                                                                                                                                                                       | Pr(III)   |
| 11 | ACUHOW   | [Nd(tpt)(NO <sub>3</sub> ) <sub>3</sub> (H <sub>2</sub> O)]·EtOH                 | A                 |                                                                                                                                                                                                                       | Nd(III)   |
| 12 | ACUHUC   | [Sm(tpt)(NO <sub>3</sub> ) <sub>3</sub> (H <sub>2</sub> O)]·EtOH                 | A                 |                                                                                                                                                                                                                       | Sm(III)   |
| 13 | ACUJAK   | [Eu(tpt)(NO <sub>3</sub> ) <sub>3</sub> (H <sub>2</sub> O)]·EtOH                 | A                 |                                                                                                                                                                                                                       | Eu(III)   |
| 14 | ACUJEO   | [Gd(tpt)(NO <sub>3</sub> ) <sub>3</sub> (H <sub>2</sub> O)]·EtOH                 | A                 |                                                                                                                                                                                                                       | Gd(III)   |
| 15 | ACUJIS   | [Tb(tpt)(NO <sub>3</sub> ) <sub>3</sub> (H <sub>2</sub> O)]·EtOH                 | A                 |                                                                                                                                                                                                                       | Tb(III)   |
| 16 | ACUJOY   | [Dy(tpt)(NO <sub>3</sub> ) <sub>3</sub> (H <sub>2</sub> O)]·EtOH                 | A                 |                                                                                                                                                                                                                       | Dy(III)   |
| 17 | ACUJUE   | [Ho(tpt)(NO <sub>3</sub> ) <sub>3</sub> (H <sub>2</sub> O)]·EtOH                 | A                 |                                                                                                                                                                                                                       | Ho(III)   |
| 18 | ACUKAL   | [Er(tpt)(NO <sub>3</sub> ) <sub>3</sub> (H <sub>2</sub> O)]·EtOH                 | A                 |                                                                                                                                                                                                                       | Er(III)   |
| 19 | ACUKEP   | [Tm(tpt)(NO <sub>3</sub> ) <sub>3</sub> (H <sub>2</sub> O)]·EtOH                 | A                 |                                                                                                                                                                                                                       | Tm(III)   |

|    |        |                                                                                                                                        |   |                                                                                                                                                                                                                           |                                                                                                                                                                                |        |
|----|--------|----------------------------------------------------------------------------------------------------------------------------------------|---|---------------------------------------------------------------------------------------------------------------------------------------------------------------------------------------------------------------------------|--------------------------------------------------------------------------------------------------------------------------------------------------------------------------------|--------|
| 20 | ACUKIT | [Yb(tpt)(NO <sub>3</sub> ) <sub>3</sub> (H <sub>2</sub> O)]·EtOH                                                                       | A |                                                                                                                                                                                                                           | Yb(III)                                                                                                                                                                        |        |
| 21 | ACUKOZ | [Yb(tpt)(NO <sub>3</sub> ) <sub>3</sub> (EtOH)]·EtOH                                                                                   | A |                                                                                                                                                                                                                           | Yb(III)                                                                                                                                                                        |        |
| 22 | ACUKUF | [Lu(tpt)(NO <sub>3</sub> ) <sub>3</sub> (EtOH)]·EtOH                                                                                   | A |                                                                                                                                                                                                                           | Lu(III)                                                                                                                                                                        |        |
| 23 | ACULAM | [Lu(tpt)(NO <sub>3</sub> ) <sub>3</sub> (H <sub>2</sub> O)]·MeCN                                                                       | A |                                                                                                                                                                                                                           | Lu(III)                                                                                                                                                                        |        |
| 24 | ACULEQ | [Lu(tpt)(NO <sub>3</sub> ) <sub>2</sub> (H <sub>2</sub> O) <sub>2</sub> ]NO <sub>3</sub> ·MeOH                                         | A |                                                                                                                                                                                                                           | Lu(III)                                                                                                                                                                        |        |
| 25 | AFATEG | [Ni(tpt)(H <sub>2</sub> O) <sub>3</sub> ](NO <sub>3</sub> ) <sub>2</sub> ·3H <sub>2</sub> O                                            | A | E. Freire, S. Baggio, J.C. Munoz, R. Baggio, <i>Acta Cryst. C</i> , 2002, <b>58</b> , m221, DOI: <a href="https://doi.org/10.1107/S0108270102002834">10.1107/S0108270102002834</a>                                        | Ni(II)                                                                                                                                                                         |        |
| 26 | AHIJEI | [(UO <sub>2</sub> ) <sub>2</sub> (tpt) <sub>2</sub> (BrC <sub>8</sub> H <sub>3</sub> O <sub>4</sub> ) <sub>2</sub> ]·2H <sub>2</sub> O | A | S.G. Thangavelu, S.J.A. Pope, Ch.L. Cahill, <i>CrystEngComm</i> , 2015, <b>17</b> , 6236, DOI: <a href="https://doi.org/10.1039/C5CE00984G">10.1039/C5CE00984G</a>                                                        | U(VI)                                                                                                                                                                          |        |
| 27 | AHIJIM | [(UO <sub>2</sub> ) <sub>2</sub> (tpt) <sub>2</sub> (ClC <sub>8</sub> H <sub>3</sub> O <sub>4</sub> ) <sub>2</sub> ]·4H <sub>2</sub> O | A |                                                                                                                                                                                                                           | U(VI)                                                                                                                                                                          |        |
| 28 | AHIJOS | [(UO <sub>2</sub> ) <sub>2</sub> (tpt) <sub>2</sub> (C <sub>8</sub> H <sub>3</sub> IO <sub>4</sub> ) <sub>2</sub> ]·2PrOH              | A |                                                                                                                                                                                                                           | U(VI)                                                                                                                                                                          |        |
| 29 | AHIJUY | [(UO <sub>2</sub> ) <sub>2</sub> (tpt) <sub>2</sub> (C <sub>9</sub> H <sub>6</sub> O <sub>4</sub> ) <sub>2</sub> ]·2H <sub>2</sub> O   | A |                                                                                                                                                                                                                           | U(VI)                                                                                                                                                                          |        |
| 30 | AHIKAF | [(UO <sub>2</sub> ) <sub>2</sub> (tpt) <sub>2</sub> (C <sub>6</sub> H <sub>2</sub> O <sub>4</sub> S) <sub>2</sub> ]·4H <sub>2</sub> O  | A |                                                                                                                                                                                                                           | U(VI)                                                                                                                                                                          |        |
| 31 | AHUJOF | [Ru(tpt)(MeCN)(Cl) <sub>2</sub> ]·MeCN·0.68H <sub>2</sub> O                                                                            | A | M. Daryanavard, H. Hadadzadeh, M. Weil, H. Farrokhpour, <i>J. CO<sub>2</sub> Util.</i> , 2017, <b>17</b> , 80, DOI: <a href="https://doi.org/10.1016/j.jcou.2016.11.009">10.1016/j.jcou.2016.11.009</a>                   | Ru(II)                                                                                                                                                                         |        |
| 32 | AQELUE | [Mn(tpt)(Br) <sub>2</sub> (H <sub>2</sub> O)]·H <sub>2</sub> O                                                                         | A | K. Ha, <i>Z. Kristallogr. NCS</i> , 2011, 226, 57, DOI: <a href="https://doi.org/10.1524/nrcs.2011.0028">10.1524/nrcs.2011.0028</a>                                                                                       | Mn(II)                                                                                                                                                                         |        |
| 33 | ASAKEK | [Bi(tpt)(C <sub>6</sub> F <sub>5</sub> S) <sub>3</sub> ]                                                                               | A | J.P.H. Charmant, A.H.M.M. Jahan, N.C. Norman, A.G. Orpen, T.J. Podesta, <i>CrystEngComm</i> , 2004, <b>6</b> , 29, DOI: <a href="https://doi.org/10.1039/b315176j">10.1039/b315176j</a>                                   | Bi(III)                                                                                                                                                                        |        |
| 34 | AYOMAD | [Mn(tpt)(MeCO <sub>2</sub> ) <sub>2</sub> (H <sub>2</sub> O)]·H <sub>2</sub> O                                                         | A | K. Ha, <i>Acta Cryst. E</i> , 2011, <b>67</b> , m1238, DOI: <a href="https://doi.org/10.1107/S1600536811032016">10.1107/S1600536811032016</a>                                                                             | Mn(II)                                                                                                                                                                         |        |
| 35 | AZIZUF | [Pb <sub>2</sub> (tpt) <sub>2</sub> (MeCO <sub>2</sub> ) <sub>2</sub> (N <sub>3</sub> ) <sub>2</sub> ]                                 | A | M. Dayani, A. Ghaemi, S.W. Ng, E.R.T. Tiekink, <i>Acta Cryst. E</i> , 2011, <b>67</b> , m1419, DOI: <a href="https://doi.org/10.1107/S1600536811038116">10.1107/S1600536811038116</a>                                     | Pb(II)                                                                                                                                                                         |        |
| 36 | BALYIX | [Pb(tpt) <sub>2</sub> (ClO <sub>4</sub> )(H <sub>2</sub> O)]ClO <sub>4</sub> ·2H <sub>2</sub> O                                        | A | J.M. Harrowfield, H. Miyamae, B.W. Skelton, A.A. Soudi, A.H. White, <i>Aust. J. Chem.</i> , 2002, <b>55</b> , 661, DOI: <a href="https://doi.org/10.1071/CH02083">10.1071/CH02083</a>                                     | Pb(II)                                                                                                                                                                         |        |
| 37 | BEJFUR | [Hg <sub>4</sub> (tpt) <sub>2</sub> (CF <sub>3</sub> CO <sub>2</sub> ) <sub>8</sub> ]                                                  | C | J. Halfpenny, R.W.H. Small, <i>Acta Cryst. B</i> , 1982, <b>38</b> , 939, DOI: <a href="https://doi.org/10.1107/S0567740882004506">10.1107/S0567740882004506</a>                                                          | Hg(II)                                                                                                                                                                         |        |
| 38 | BEMGUW | [Cu <sub>2</sub> (tpt)(MeOH)(Cl) <sub>4</sub> ]                                                                                        | C | T. Glaser, T. Lugger, R. Fröhlich, <i>Eur. J. Inorg. Chem.</i> , 2004, 394, DOI: <a href="https://doi.org/10.1002/ejic.200300443">10.1002/ejic.200300443</a>                                                              | Cu(II)                                                                                                                                                                         |        |
| 39 | BENHAD | [Cu(tpt)(Medpt)](BF <sub>4</sub> ) <sub>2</sub> ·2MeOH                                                                                 | A |                                                                                                                                                                                                                           | Cu(II)                                                                                                                                                                         |        |
| 40 | BIWWUA | [Ni(tpt)(Hsalaglu)]ClO <sub>4</sub> ·MeOH                                                                                              | A | A. Burkhardt, W. Plass, <i>Inorg. Chem. Commun.</i> , 2008, <b>11</b> , 303, DOI: <a href="https://doi.org/10.1016/j.inoche.2007.12.006">10.1016/j.inoche.2007.12.006</a>                                                 | Ni(II)                                                                                                                                                                         |        |
| 41 | BOPKEX | [Tb <sub>0.1</sub> Gd <sub>0.9</sub> (tpt)(H <sub>2</sub> O) <sub>6</sub> ]Cl <sub>3</sub> ·3H <sub>2</sub> O                          | A | Y.-F. Zhao, Y.-L. Zhao, F. Bai, Y. Wang, <i>J. Fluoresc.</i> , 2009, <b>19</b> , 179, DOI: <a href="https://doi.org/10.1007/s10895-008-0401-7">10.1007/s10895-008-0401-7</a>                                              | Gd(III)<br>Tb(III)                                                                                                                                                             |        |
| 42 | BOZNIO | [Ni(tpt)( <i>i</i> -PrOpdt) <sub>2</sub> ]                                                                                             | A | M.C. Aragoni, M. Arca, M. Crespo, F.A. Devillanova, M.B. Hursthouse, S.L. Huth, F. Isaia, V. Lippolis, G. Verani, <i>Dalton Trans.</i> , 2009, 2510, DOI: <a href="https://doi.org/10.1039/b819326f">10.1039/b819326f</a> | Ni(II)                                                                                                                                                                         |        |
| 43 | BOZNOU | [Ni(tpt)(EtOpdt) <sub>2</sub> ]                                                                                                        | A |                                                                                                                                                                                                                           | Ni(II)                                                                                                                                                                         |        |
| 44 | BOZNUA | [Ni(tpt)(PrOpdt) <sub>2</sub> ]                                                                                                        | A |                                                                                                                                                                                                                           | Ni(II)                                                                                                                                                                         |        |
| 45 | BOZPAI | [Ni(tpt)(BuOpdt) <sub>2</sub> ]                                                                                                        | A |                                                                                                                                                                                                                           | Ni(II)                                                                                                                                                                         |        |
| 46 | BOZPEM | [Ni(tpt)((EtO) <sub>2</sub> (PS <sub>2</sub> ) <sub>2</sub> ) <sub>2</sub> ]                                                           | A |                                                                                                                                                                                                                           | Ni(II)                                                                                                                                                                         |        |
| 47 | BOZPIQ | [Ni(tpt)(EtOpdt)(H <sub>2</sub> O)]NO <sub>3</sub>                                                                                     | A |                                                                                                                                                                                                                           | Ni(II)                                                                                                                                                                         |        |
| 48 | BUDNOF | [Mn <sub>2</sub> (tpt) <sub>2</sub> (N <sub>3</sub> ) <sub>2</sub> (NO <sub>3</sub> ) <sub>2</sub> (H <sub>2</sub> O)]                 | A |                                                                                                                                                                                                                           | P. Wang, L. Kong, D. Zhang, <i>J. Chem. Res.</i> , 2014, <b>38</b> , 477, DOI: <a href="https://doi.org/10.3184/174751914X14052744149037">10.3184/174751914X14052744149037</a> | Mn(II) |
| 49 | BUFRUQ | [Ni <sub>2</sub> (tpt) <sub>2</sub> (SO <sub>4</sub> ) <sub>2</sub> (H <sub>2</sub> O) <sub>2</sub> ]·6H <sub>2</sub> O                | A |                                                                                                                                                                                                                           | M.C. Aragoni, M. Arca, M. Crespo, F.A.                                                                                                                                         | Ni(II) |

|    |        |                                                                                                                                                |   |                                                                                                                                                                                                                                                                 |                         |
|----|--------|------------------------------------------------------------------------------------------------------------------------------------------------|---|-----------------------------------------------------------------------------------------------------------------------------------------------------------------------------------------------------------------------------------------------------------------|-------------------------|
|    |        |                                                                                                                                                |   | Devillanova, M.B. Hursthouse, S.L. Huth, F. Isaia, V. Lippolis, G. Verani, <i>Dalton Trans.</i> , 2009, 2510, DOI: <a href="https://doi.org/10.1039/b819326f">10.1039/b819326f</a>                                                                              |                         |
| 50 | CICXIW | [Cd(tpt)Cl <sub>2</sub> ] $\cdot$ 3H <sub>2</sub> O                                                                                            | A | H.-Zh. Xie, W.-J. Pan, <i>Acta Cryst. C</i> , 2007, <b>63</b> , m204, DOI: <a href="https://doi.org/10.1107/S0108270107015703">10.1107/S0108270107015703</a>                                                                                                    | Cd(II)                  |
| 51 | COMNAV | [Cu(tpt)(Ph <sub>3</sub> P) <sub>2</sub> ]NO <sub>3</sub> $\cdot$ H <sub>2</sub> O                                                             | B | A. Báez-Castro, J. Baldenebro-López, A. Cruz-Enríquez, H. Höpfl, D. Glossman-Mitnik, M.-S. Valentín, M. Parra-Hake, J.J. Campos-Gaxiola, <i>RSC Advances</i> , 2014, <b>4</b> , 42624, DOI: <a href="https://doi.org/10.1039/C4RA06512C">10.1039/C4RA06512C</a> | Cu(I)                   |
| 52 | CUZLUG | {Na <sub>2</sub> [(UO <sub>2</sub> ) <sub>2</sub> (adc) <sub>2</sub> (pca) <sub>2</sub> ](tpt) <sub>2</sub> } <sub>n</sub>                     | A | S.G. Thangavelu, Ch.L. Cahill, <i>Cryst. Growth Des.</i> , 2016, <b>16</b> , 42, DOI: <a href="https://doi.org/10.1021/acs.cgd.5b00778">10.1021/acs.cgd.5b00778</a>                                                                                             | UO <sub>2</sub> , Na(I) |
| 53 | DAHTIR | [Ru(tpt)(P-PPh <sub>2</sub> Py) <sub>2</sub> Cl]BF <sub>4</sub> $\cdot$ H <sub>2</sub> O                                                       | A | P. Kumar, A.K. Singh, R. Pandey, D.S. Pandey, <i>J. Organomet. Chem.</i> , 2011, <b>696</b> , 3454, DOI: <a href="https://doi.org/10.1016/j.jorganchem.2011.06.031">10.1016/j.jorganchem.2011.06.031</a>                                                        | Ru(II)                  |
| 54 | DEBTEK | [Ru(tpt)(PPh <sub>3</sub> ) <sub>2</sub> Cl]PF <sub>6</sub>                                                                                    | A | K.S. Singh, Yu.A. Mozharivskiy, M.R. Kollipara, <i>Z. Anorg. Allg. Chem.</i> , 2006, <b>632</b> , 172, DOI: <a href="https://doi.org/10.1002/zaac.200500301">10.1002/zaac.200500301</a>                                                                         | Ru(II)                  |
| 55 | DEJGIJ | [Cu <sub>2</sub> (tpt)(CN) <sub>2</sub> ] <sub>n</sub>                                                                                         | E | X.-P. Zhou, D. Li, T. Wu, X. Zhang, <i>Dalton Trans.</i> , 2006, 2435, DOI: <a href="https://doi.org/10.1039/b517969f">10.1039/b517969f</a>                                                                                                                     | Cu(I)                   |
| 56 | DEJGOP | [Cu <sub>2</sub> (tpt)(CN)(SCN)] <sub>n</sub>                                                                                                  | E |                                                                                                                                                                                                                                                                 | Cu(I)                   |
| 57 | DEJGUV | [Cu <sub>2</sub> (tpt)(SCN) <sub>2</sub> ] <sub>n</sub>                                                                                        | A |                                                                                                                                                                                                                                                                 | Cu(I)                   |
| 58 | DEMLUD | [Cu <sub>2</sub> (tpt)(CN) <sub>2</sub> ] <sub>n</sub>                                                                                         | F |                                                                                                                                                                                                                                                                 | Cu(I)                   |
| 59 | DIDVOC | [Cu(tpt)(2-pa)]N(CN) <sub>2</sub> $\cdot$ 7H <sub>2</sub> O                                                                                    | A | Q.-H. Zhao, M.-S. Zhang, R.-B. Fang, <i>J. Struct. Chem.</i> , 2006, <b>47</b> , 764, DOI: <a href="https://doi.org/10.1007/s10947-006-0367-8">10.1007/s10947-006-0367-8</a>                                                                                    | Cu(II)                  |
| 60 | DIYLAZ | [Ru(tpt)(PPh <sub>3</sub> )Cl <sub>2</sub> ]                                                                                                   | A | S. Sharma, S.K. Singh, D.S. Pandey, <i>Inorg. Chem.</i> , 2008, <b>47</b> , 1179, DOI: <a href="https://doi.org/10.1021/ic701518e">10.1021/ic701518e</a>                                                                                                        | Ru(II)                  |
| 61 | DIYLED | [Ru(tpt)(dppm)Cl]BF <sub>4</sub>                                                                                                               | A |                                                                                                                                                                                                                                                                 | Ru(II)                  |
| 62 | DIYLIH | [Ru(tpt)(PPh <sub>3</sub> )(pa)]Cl $\cdot$ CH <sub>2</sub> Cl <sub>2</sub> $\cdot$ H <sub>2</sub> O                                            | A |                                                                                                                                                                                                                                                                 | Ru(II)                  |
| 63 | DIYLON | [Ru <sub>2</sub> (tpt)(PPh <sub>3</sub> )(cym)Cl <sub>3</sub> ]PF <sub>6</sub> $\cdot$ H <sub>2</sub> O                                        | C |                                                                                                                                                                                                                                                                 | Ru(II)                  |
| 64 | DIYLUT | [RuRh(tpt)(PPh <sub>3</sub> )(Cp)Cl <sub>3</sub> ]BF <sub>4</sub> $\cdot$ H <sub>2</sub> O                                                     | C |                                                                                                                                                                                                                                                                 | Ru(II), Rh(II)          |
| 65 | ECAKUO | [Re(tpt)(CO) <sub>3</sub> Cl]                                                                                                                  | B | X. Chen, F.J. Femia, J.W. Babich, J.A. Zubieta, <i>Inorg. Chem.</i> , 2001, <b>40</b> , 2769, DOI: <a href="https://doi.org/10.1021/ic000446g">10.1021/ic000446g</a>                                                                                            | Re(I)                   |
| 66 | ECALAV | [Re(tpt)(CO) <sub>3</sub> Br]                                                                                                                  | B |                                                                                                                                                                                                                                                                 | Re(I)                   |
| 67 | ECALEZ | [Re(tpt)(CO) <sub>3</sub> Cl] <sub>2</sub> $\cdot$ acetone                                                                                     | F |                                                                                                                                                                                                                                                                 | Re(I)                   |
| 68 | ECALID | [Re(tpt)(CO) <sub>3</sub> Br] <sub>2</sub> $\cdot$ acetone                                                                                     | F |                                                                                                                                                                                                                                                                 | Re(I)                   |
| 69 | ECALOJ | [Re(tpt)(CO) <sub>3</sub> Br] <sub>2</sub> $\cdot$ CH <sub>2</sub> Cl <sub>2</sub> $\cdot$ 0.5H <sub>2</sub> O                                 | F |                                                                                                                                                                                                                                                                 | Re(I)                   |
| 70 | ELUWIT | [Ru(tpt)(dmbpy)Cl]PF <sub>6</sub> $\cdot$ dmf $\cdot$ 2H <sub>2</sub> O                                                                        | A | H. Hadadzadeh, H. Farrokhpour, J. Simpson, J. Shakeri, M. Daryanavard, M. Shokrollahi, <i>New J. Chem.</i> , 2016, <b>40</b> , 6347, DOI: <a href="https://doi.org/10.1039/C5NJ03600C">10.1039/C5NJ03600C</a>                                                   | Ru(II)                  |
| 71 | EMELIS | [Mn(tpt)(MeCO <sub>2</sub> )(H <sub>2</sub> O) <sub>2</sub> ]NO <sub>3</sub> $\cdot$ H <sub>2</sub> O                                          | A | M.M. Najafpour, D.M. Boghaei, V. McKee, <i>Polyhedron</i> , 2010, <b>29</b> , 3246, DOI: <a href="https://doi.org/10.1016/j.poly.2010.09.001">10.1016/j.poly.2010.09.001</a>                                                                                    | Mn(II)                  |
| 72 | EREVED | [Nd(tpt)(NO <sub>3</sub> ) <sub>3</sub> (H <sub>2</sub> O)] $\cdot$ 2H <sub>2</sub> O                                                          | A | J. Zhou, G.-X. Lu, Y.-G. Zhang, D.-Y. Wei, <i>Acta Cryst. E</i> , 2011, <b>67</b> , m699, DOI: <a href="https://doi.org/10.1107/S1600536811014589">10.1107/S1600536811014589</a>                                                                                | Nd(III)                 |
| 73 | EREWEF | {[Ni(tpt)(H <sub>2</sub> O) <sub>3</sub> ][Ni(tpt)(Cl)(H <sub>2</sub> O) <sub>2</sub> ]}Cl <sub>3</sub> $\cdot$ 5H <sub>2</sub> O              | A | A. Boshala, I. Warad, U. Flörke, <i>CSD Communication</i> , 2016.                                                                                                                                                                                               | Ni(II)                  |
| 74 | ETIHOG | [Cu <sub>4</sub> (tpt) <sub>2</sub> (MeCN) <sub>2</sub> (C <sub>2</sub> H <sub>4</sub> ) <sub>2</sub> ](PF <sub>6</sub> ) <sub>4</sub> $\cdot$ | K | M. Mackawa, K. Sugimoto, T. Okubo, T.                                                                                                                                                                                                                           | Cu(I)                   |

|    |        |                                                                                                                                                                                                                                |   |                                                                                                                                                                                                           |                  |
|----|--------|--------------------------------------------------------------------------------------------------------------------------------------------------------------------------------------------------------------------------------|---|-----------------------------------------------------------------------------------------------------------------------------------------------------------------------------------------------------------|------------------|
|    |        | MeEtCO                                                                                                                                                                                                                         |   | Kuroda-Sowa, M. Munakata, <i>ChemistrySelect</i> , 2016, <b>1</b> , 3812, DOI: <a href="https://doi.org/10.1002/slct.201600791">10.1002/slct.201600791</a>                                                |                  |
| 75 | EYIMUU | $[\text{Zn}(\text{tpt})_2]\text{S}_2\text{O}_8 \cdot 2\text{H}_2\text{O}$                                                                                                                                                      | A | M.A. Harvey, S. Baggio, A. Ibanez, R. Baggio, <i>Acta Cryst. C</i> , 2004, <b>60</b> , m375, DOI: <a href="https://doi.org/10.1107/S0108270104014337">10.1107/S0108270104014337</a>                       | Zn(II)           |
| 76 | FEGNOW | $\{[\text{Pr}(\text{tpt})(\text{fa})_3] \cdot \text{H}_2\text{O}\}_n$                                                                                                                                                          | A | N. Lopez, H. Zhao, D. Zhao, H.-C. Zhou, J.P. Riebenspies, K.R. Dunbar, <i>Dalton Trans.</i> , 2013, <b>42</b> , 54, DOI: <a href="https://doi.org/10.1039/c2dt31842c">10.1039/c2dt31842c</a>              | Pr(III)          |
| 77 | FEGNUC | $\{[\text{Sm}(\text{tpt})(\text{fa})_3] \cdot \text{H}_2\text{O}\}_n$                                                                                                                                                          | A |                                                                                                                                                                                                           | Sm(III)          |
| 78 | FIGGAE | $[\text{Mn}(\text{tpt})(\text{MeCO}_2)(\text{H}_2\text{O})_2]\text{ClO}_4$                                                                                                                                                     | A | A. Majumder, C.R. Choudhury, S. Mitra, C. Marschner, J. Baumgartner, <i>Z. Naturforsch. B</i> , 2005, <b>60</b> , 99, DOI: <a href="https://doi.org/10.1515/znb-2005-0115">10.1515/znb-2005-0115</a>      | Mn(II)           |
| 79 | FIGGEI | $[\text{Co}(\text{tpt})(\text{SO}_4)(\text{H}_2\text{O})_2] \cdot \text{H}_2\text{O}$                                                                                                                                          | A |                                                                                                                                                                                                           | Co(II)           |
| 80 | FOLXAG | $[\text{Ag}_2(\text{tpt})(\text{dppm})_2(\text{dmf})](\text{BF}_4)_2 \cdot \text{dmf}$                                                                                                                                         | B | L. Zhang, X.-Q. Lü, Q. Zhang, Ch.-L. Chen, B.-Sh. Kang, <i>Trans. Met. Chem.</i> , 2005, <b>30</b> , 76, DOI: <a href="https://doi.org/10.1007/s11243-004-3000-8">10.1007/s11243-004-3000-8</a>           | Ag(I)            |
| 81 | FOLXEK | $\{[\text{Ag}_2(\text{tpt})_2(\text{dppe})_2](\text{BF}_4)_2 \cdot \text{MeOH} \cdot 4\text{H}_2\text{O}\}_n$                                                                                                                  | B |                                                                                                                                                                                                           | Ag(I)            |
| 82 | FOLXIO | $[\text{Ag}_2(\text{tpt})_2(\text{dppp})_2](\text{BF}_4)_2$                                                                                                                                                                    | B |                                                                                                                                                                                                           | Ag(I)            |
| 83 | FOLXOU | $[\text{Ag}_2(\text{tpt})_2(\text{dppb})_2](\text{BF}_4)_2$                                                                                                                                                                    | A |                                                                                                                                                                                                           | Ag(I)            |
| 84 | GADLON | $[\text{Cd}_2(\text{tpt})_2(\text{SO}_4)_2(\text{H}_2\text{O})_2] \cdot 4\text{H}_2\text{O}$                                                                                                                                   | A | M. Harvey, S. Baggio, S. Russi, R. Baggio, <i>Acta Cryst. C</i> , 2003, <b>59</b> , m171, DOI: <a href="https://doi.org/10.1107/S0108270103006462">10.1107/S0108270103006462</a>                          | Cd(II)           |
| 85 | GIHQAA | $[\text{Mn}(\text{tpt})(\text{MeOH})(\text{Cl})_2] \cdot \text{H}_2\text{O}$                                                                                                                                                   | A | H. Zhao, M. Shatruck, A.V. Prosvirin, K.R. Dunbar, <i>Chem. Eur. J.</i> , 2007, <b>13</b> , 6573, DOI: <a href="https://doi.org/10.1002/chem.200700298">10.1002/chem.200700298</a>                        | Mn(II)           |
| 86 | GIHQEU | $[\text{Mn}(\text{tpt})(\text{NO}_3)(\text{H}_2\text{O})_2][\text{NO}_3] \cdot 1.5\text{H}_2\text{O}$                                                                                                                          | A |                                                                                                                                                                                                           | Mn(II)           |
| 87 | GIHQIY | $[\text{Mn}_2(\text{tpt})_2(\text{MeCO}_2)_2(\text{H}_2\text{O})_4]$<br>$[\text{Mn}_2\text{W}_2(\text{tpt})_2(\text{CN})_{16}(\text{MeOH})_{3.16}(\text{H}_2\text{O})_{0.84}] \cdot 5\text{MeOH} \cdot 9.85\text{H}_2\text{O}$ | A |                                                                                                                                                                                                           | Mn(II),<br>W(V)  |
| 88 | GIHQOE | $\{[\text{Mn}_2\text{W}(\text{tpt})_2(\text{CN})_8(\text{MeOH})_2] \cdot 2\text{MeOH}\}_n$                                                                                                                                     | A |                                                                                                                                                                                                           | Mn(II),<br>W(IV) |
| 89 | GIHQUK | $\{[\text{Mn}_2\text{W}(\text{tpt})_2(\text{CN})_8(\text{MeCO}_2)(\text{MeOH})_3] \cdot 3.5\text{MeOH} \cdot 0.25\text{H}_2\text{O}\}_n$                                                                                       | A |                                                                                                                                                                                                           | Mn(II),<br>W(IV) |
| 90 | GIHRAR | $[\text{Mn}_6\text{W}_4(\text{tpt})_6(\text{CN})_{32}(\text{MeOH})_4(\text{dmf})_2] \cdot 2.3\text{MeOH} \cdot 8.2\text{H}_2\text{O}$                                                                                          | A |                                                                                                                                                                                                           | Mn(II),<br>W(V)  |
| 91 | GIHREV | $\{[\text{Mn}_2\text{W}(\text{tpt})_2(\text{CN})_8(\text{MeOH})_3]$<br>$[\text{MnW}(\text{tpt})(\text{CN})_8(\text{MeOH})] \cdot \text{MeOH} \cdot 2\text{H}_2\text{O}\}_n$                                                    | A |                                                                                                                                                                                                           | Mn(II),<br>W(V)  |
| 92 | GIHRIZ | $[\text{Mn}_4\text{W}_2(\text{tpt})_4(\text{CN})_{16}(\text{MeOH})_4(\text{NO}_3)_2(\text{dmf})_2] \cdot 6\text{MeOH}$                                                                                                         | A |                                                                                                                                                                                                           | Mn(II),<br>W(V)  |
| 93 | GOLPUS | $[\text{Sn}(\text{tpt})(\text{Me})_2(\text{Cl})_2][\text{Sn}(\text{Me})_2(\text{Cl})_2(\text{H}_2\text{O})]$                                                                                                                   | A | K.M. Lo, V.G.K. Das, S.W. Ng, <i>Acta Cryst. C</i> , 1999, <b>55</b> , 1058, DOI: <a href="https://doi.org/10.1107/S0108270199004928">10.1107/S0108270199004928</a>                                       | Sn(II)           |
| 94 | GULPAF | $[(\text{AgCN})_3(\text{tpt})]_n$                                                                                                                                                                                              | D | J.-D. Lin, M.-Zh. Lin, C.-C. Jia, Zh.-H. Li, Sh.-W. Du, <i>Inorg. Chem. Commun.</i> , 2009, <b>12</b> , 487, DOI: <a href="https://doi.org/10.1016/j.inoche.2009.04.002">10.1016/j.inoche.2009.04.002</a> | Ag(I)            |
| 95 | GUTHOV | $[\text{Ni}_3(\text{tpt})_3(\text{saltag}^{\text{Br}})]\text{NO}_3$                                                                                                                                                            | A | M. Böhme, A.E. Ion, B. Kintzel, A. Buchholz, H. Görls, W. Plass, <i>Z. Anorg. Allg. Chem.</i> , 2020, <b>646</b> , 999, DOI: <a href="https://doi.org/10.1002/zaac.202000054">10.1002/zaac.202000054</a>  | Ni(II)           |
| 96 | GUTHUB | $[\text{Ni}_5(\text{tpt})_4(\text{saltag}^{\text{Br}})_2]$                                                                                                                                                                     | A |                                                                                                                                                                                                           | Ni(II)           |
| 97 | HAZBAN | $[\text{Ag}_4(\text{tpt})_2(\text{F}_3\text{CCO}_2)_4(\text{H}_2\text{O})]_n$                                                                                                                                                  | C | G. Meyer, M. Schabi, I. Pantenburg, <i>Design and Construction of Coordination Polymers</i> , Wiley, 2009, DOI: <a href="https://doi.org/10.1002/9780470467336">10.1002/9780470467336</a>                 | Ag(I)            |
| 98 | HOLDOB | $[\text{Eu}(\text{tpt})(\text{Cl})_3(\text{MeOH})_2] \cdot \text{MeOH}$                                                                                                                                                        | A | R. Wietzke, M. Mazzanti, J.-M. Latour, <i>ChemistrySelect</i> , 2016, <b>1</b> , 3812, DOI: <a href="https://doi.org/10.1002/slct.201600791">10.1002/slct.201600791</a>                                   | Eu(III)          |

|     |        |                                                                                                                |   |                                                                                                                                                                                                                                                                   |               |
|-----|--------|----------------------------------------------------------------------------------------------------------------|---|-------------------------------------------------------------------------------------------------------------------------------------------------------------------------------------------------------------------------------------------------------------------|---------------|
| 99  | HOLDUH | [Pr(tpt)(O <sub>2</sub> CMe) <sub>3</sub> ] <sub>2</sub> ·2MeOH                                                | A | J. Pecaut, <i>Inorg. Chem.</i> , 1999, <b>38</b> , 3581, DOI: <a href="https://doi.org/10.1021/ic990122w">10.1021/ic990122w</a>                                                                                                                                   | Pr(III)       |
| 100 | HUJKOM | [Fe(tpt)(Cl) <sub>3</sub> ]·MeCN·0.5H <sub>2</sub> O                                                           | A | S.A. Cotton, V. Franckevicius, J. Fawcett, <i>Polyhedron</i> , 2002, <b>21</b> , 2055, DOI: <a href="https://doi.org/10.1016/S0277-5387(02)01137-3">10.1016/S0277-5387(02)01137-3</a>                                                                             | Fe(III)       |
| 101 | IDAPUA | [Mn(tpt)(Br) <sub>2</sub> ]                                                                                    | A | K. Ha, <i>Acta Cryst. E</i> , 2011, <b>67</b> , m1655, DOI: <a href="https://doi.org/10.1107/S1600536811045211">10.1107/S1600536811045211</a>                                                                                                                     | Mn(II)        |
| 102 | IGALAD | [RuH(CO)(PPh <sub>3</sub> ) <sub>2</sub> (tpt)]BF <sub>4</sub>                                                 | B | M. Chandra, A.N. Sahay, D.S. Pandey, M.C. Puerta, P. Valerga, <i>J. Organomet. Chem.</i> , 2002, <b>648</b> , 39, DOI: <a href="https://doi.org/10.1016/S0022-328X(01)01470-X">10.1016/S0022-328X(01)01470-X</a>                                                  | Ru(II)        |
| 103 | IGAWOC | [Rh(tpt)(Cl) <sub>3</sub> ]·dmsO                                                                               | A | F.P. Pruchnik, P. Jakimowicz, Z. Ciunik, J. Zakrzewska-Czerwinska, A. Opolski, J. Wietrzyk, E. Wojdat, <i>Inorg. Chim. Acta</i> , 2002, <b>334</b> , 59, DOI: <a href="https://doi.org/10.1016/S0020-1693(02)00776-4">10.1016/S0020-1693(02)00776-4</a>           | Rh(III)       |
| 104 | IQESAY | [Eu(tpt)(dbm) <sub>3</sub> ]·Me <sub>2</sub> CO                                                                | A | C.R. De Silva, J. Wang, M.D. Carducci, S.A. Rajapakshe, Z. Zheng, <i>Inorg. Chim. Acta</i> , 2004, <b>357</b> , 630, DOI: <a href="https://doi.org/10.1016/j.ica.2003.08.006">10.1016/j.ica.2003.08.006</a>                                                       | Eu(III)       |
| 105 | IZOGIO | [Mn(tpt)(tda)(H <sub>2</sub> O)]·2H <sub>2</sub> O                                                             | A | A. Grirrane, A. Pastor, A. Galindo, E. Alvarez, C. Mealli, A. Ienco, A. Orlandini, P. Rosa, A. Caneschi, A.-L. Barra, J.F. Sanz, <i>Chem. Eur. J.</i> , 2011, <b>17</b> , 10600, DOI: <a href="https://doi.org/10.1002/chem.201100988">10.1002/chem.201100988</a> | Mn(II)        |
| 106 | IZOGOU | [Mn(tpt)(tda)(H <sub>2</sub> O)] <sub>2</sub> ·2H <sub>2</sub> O                                               | A | A. Grirrane, A. Pastor, A. Galindo, E. Alvarez, C. Mealli, A. Ienco, A. Orlandini, P. Rosa, A. Caneschi, A.-L. Barra, J.F. Sanz, <i>Chem. Eur. J.</i> , 2011, <b>17</b> , 10600, DOI: <a href="https://doi.org/10.1002/chem.201100988">10.1002/chem.201100988</a> | Mn            |
| 107 | JATJEU | [Os(tpt)(PPh <sub>3</sub> ) <sub>2</sub> (Cl)]BF <sub>4</sub> ·H <sub>2</sub> O                                | A | S.K. Singh, S. Sharma, M. Chandra, D.S. Pandey, <i>J. Organomet. Chem.</i> , 2005, <b>690</b> , 3105, DOI: <a href="https://doi.org/10.1016/j.jorganchem.2005.03.051">10.1016/j.jorganchem.2005.03.051</a>                                                        | Os(III)       |
| 108 | JATRUR | [Cu(tpt)(pca) <sub>2</sub> ]CF <sub>3</sub> SO <sub>3</sub>                                                    | A | J. Faus, M. Julve, J.M. Amigo, T. Debaerdemaeker, <i>J. Chem. Soc., Dalton Trans.</i> , 1989, 1681, DOI: <a href="https://doi.org/10.1039/dt9890001681">10.1039/dt9890001681</a>                                                                                  | Cu(II)        |
| 109 | JEBCAX | [Ni(tpt)(Cl) <sub>2</sub> (H <sub>2</sub> O)]·H <sub>2</sub> O                                                 | A | N.K. Yagci, K. Guven, G.D. Yildiz, Z. <i>Kristallogr. NCS</i> , 2017, <b>232</b> , 485, DOI: <a href="https://doi.org/10.1515/ncrs-2016-0332">10.1515/ncrs-2016-0332</a>                                                                                          | Ni(II)        |
| 110 | JEQTUV | [Rh(tpt)(Cl)(Cp*)]BF <sub>4</sub> ·dcm                                                                         | B | S.K. Singh, M. Chandra, S.K. Dubey, D.S. Pandey, <i>Eur. J. Inorg. Chem.</i> , 2006, 3954, DOI: <a href="https://doi.org/10.1002/ejic.200600355">10.1002/ejic.200600355</a>                                                                                       | Rh(III)       |
| 111 | JUTJUG | {[Cd(tpt)(pa)(H <sub>2</sub> O)]·2dmf} <sub>n</sub>                                                            | A | J.-F. Chu, Sh.-Y. Wang, J.-C. Liu, H.-B. Hu, Q.-X. Xu, <i>Z. Anorg. Allg. Chem.</i> , 2020, <b>646</b> , 420, DOI: <a href="https://doi.org/10.1002/zaac.202000112">10.1002/zaac.202000112</a>                                                                    | Cd(II)        |
| 112 | JUXPEX | [AuRu <sub>2</sub> (tpt) <sub>2</sub> (terpy) <sub>2</sub> ](ClO <sub>4</sub> ) <sub>5</sub> ·H <sub>2</sub> O | C | N. Gupta, N. Grover, A. Neyhart, P. Singh, H.H. Thorp, <i>Inorg. Chem.</i> , 1993, <b>32</b> , 310, DOI: <a href="https://doi.org/10.1021/ic00055a014">10.1021/ic00055a014</a>                                                                                    | Ru(II), Ag(I) |
| 113 | KANNOE | [Cu <sub>2</sub> (tpt) <sub>2</sub> (dpaa) <sub>2</sub> ](ClO <sub>4</sub> ) <sub>2</sub> ·3H <sub>2</sub> O   | B | H.-W. Xu, L.-x. Zhang, Y.-h. Li, H.-f. Wang, <i>Synthesis and Reactivity in Inorganic, Metal-Organic, and Nano-Metal Chemistry</i> , 2011, <b>41</b> , 743, DOI: <a href="https://doi.org/10.1080/15533174.2011.591297">10.1080/15533174.2011.591297</a>          | Cu(II)        |
| 114 | KEWCEW | [Sm(tpt)(acacF <sub>3</sub> ) <sub>2</sub> (NO <sub>3</sub> )]                                                 | A | L. Panayiotidou, M. Stylianiou, N. Arabatzis, C. Drouza, P. Lianos, E. Stathatos, A.D. Keramidias, <i>Polyhedron</i> ,                                                                                                                                            | Sm(III)       |
| 115 | KEWCOG | [Eu(tpt)(acacF <sub>3</sub> ) <sub>2</sub> (MeOH) <sub>2</sub> ]Cl                                             | A | Stathatos, A.D. Keramidias, <i>Polyhedron</i> ,                                                                                                                                                                                                                   | Eu(III)       |

|     |         |                                                                                                                                                                                                                               |          |                                                                                                                                                                                                                                          |         |
|-----|---------|-------------------------------------------------------------------------------------------------------------------------------------------------------------------------------------------------------------------------------|----------|------------------------------------------------------------------------------------------------------------------------------------------------------------------------------------------------------------------------------------------|---------|
|     |         |                                                                                                                                                                                                                               |          | 2013, <b>52</b> , 856,<br>DOI: <a href="https://doi.org/10.1016/j.poly.2012.07.029">10.1016/j.poly.2012.07.029</a>                                                                                                                       |         |
| 116 | KEZHIH  | $\{[\text{Ag}(\text{tpt})]\text{ClO}_4\}_n$                                                                                                                                                                                   | <b>H</b> | X.-P. Zhou, X. Zhang, Sh.-H. Lin, D. Li,<br><i>Cryst. Growth Des.</i> , 2007, <b>7</b> , 485,<br>DOI: <a href="https://doi.org/10.1021/cg0608256">10.1021/cg0608256</a>                                                                  | Ag(I)   |
| 117 | KEZHON  | $\{[\text{Ag}(\text{tpt})]\text{BF}_4\}_n$                                                                                                                                                                                    | <b>H</b> |                                                                                                                                                                                                                                          | Ag(I)   |
| 118 | KEZHUT  | $\{[\text{Ag}(\text{tpt})]\text{PF}_6\}_n$                                                                                                                                                                                    | <b>H</b> |                                                                                                                                                                                                                                          | Ag(I)   |
| 119 | KEZJAB  | $\{[\text{Ag}_2(\text{tpt})(\text{CF}_3\text{CO}_2)_2(\text{H}_2\text{O})][\text{Ag}_2(\text{tpt})(\text{CF}_3\text{CO}_2)_2]\} \cdot 0.5\text{H}_2\text{O}$                                                                  | <b>C</b> |                                                                                                                                                                                                                                          | Ag(I)   |
| 120 | KIBJEL  | $[\text{Tb}(\text{tpt})(\text{dbm})_3]$                                                                                                                                                                                       | <b>A</b> | C.R. De Silva, J.R. Maeyer, A. Dawson,<br>Z. Zheng, <i>Polyhedron</i> , 2007, <b>26</b> , 1229,<br>DOI: <a href="https://doi.org/10.1016/j.poly.2006.10.049">10.1016/j.poly.2006.10.049</a>                                              | Tb(III) |
| 121 | KIBJOV  | $[\text{Er}(\text{tpt})(\text{dbm})_3] \cdot \text{Et}_2\text{O}$                                                                                                                                                             | <b>A</b> |                                                                                                                                                                                                                                          | Er(III) |
| 122 | KIBJUB  | $[\text{Er}(\text{tpt})(\text{tta})_3] \cdot \text{EtOH}$                                                                                                                                                                     | <b>A</b> |                                                                                                                                                                                                                                          | Eu(III) |
| 123 | KIBKAI  | $[\text{Er}(\text{tpt})(\text{ba})_3]$                                                                                                                                                                                        | <b>A</b> |                                                                                                                                                                                                                                          | Eu(III) |
| 124 | KIBKEM  | $[\text{Er}(\text{tpt})(\text{btfa})_3] \cdot \text{EtOH}$                                                                                                                                                                    | <b>A</b> |                                                                                                                                                                                                                                          | Eu(III) |
| 125 | KIBLAJ  | $[\text{Pb}(\text{tpt})(\text{btfa})_2] \cdot \text{H}_2\text{O}$                                                                                                                                                             | <b>A</b> | F. Marandi, N. Asghari, M. Gorbanloo,<br>A.A. Soudi, P. Mayer, <i>Z. Anorg. Allg. Chem.</i> , 2007, <b>633</b> , 536,<br>DOI: <a href="https://doi.org/10.1002/zaac.200600341">10.1002/zaac.200600341</a>                                | Pb(II)  |
| 126 | KUHXER  | $[\text{Co}(\text{tpt})(\text{dca})_2](\text{ClO}_4)_2$                                                                                                                                                                       | <b>A</b> | A. Das, C. Marschner, J. Cano, J. Baumgartner, J. Ribas, M.S. El Fallah, S. Mitra, <i>Polyhedron</i> , 2009, <b>28</b> , 2436,<br>DOI: <a href="https://doi.org/10.1016/j.poly.2009.04.024">10.1016/j.poly.2009.04.024</a>               | Co(II)  |
| 127 | KUJXET  | $\{[\text{UO}_2(\text{tpt})(\text{py})]\text{O}\}(\text{I}_3)_2$                                                                                                                                                              | <b>A</b> | J.-C. Berthet, P. Thuery, M.R.S. Foreman, M. Ephritikhine, <i>Radiochim. Acta</i> , 2008, <b>96</b> , 189,<br>DOI: <a href="https://doi.org/10.1524/ract.2008.1478">10.1524/ract.2008.1478</a>                                           | U(VI)   |
| 128 | LAFHAE  | $[\text{Cu}_2(\text{tpt})(\text{pop})_2](\text{PF}_6)_2 \cdot 2\text{dcm}$                                                                                                                                                    | <b>F</b> | S. Keller, A. Prescimone, E.C. Constable, C.E. Housecroft, <i>Polyhedron</i> , 2016, <b>116</b> , 3,<br>DOI: <a href="https://doi.org/10.1016/j.poly.2016.01.033">10.1016/j.poly.2016.01.033</a>                                         | Cu(I)   |
| 129 | LAMXUU  | $[\text{Zn}(\text{tpt})(\text{hmdc})] \cdot 1.5\text{diox}$                                                                                                                                                                   | <b>A</b> | H.D. Arman, P. Poplaukhin, E.R.T. Tiekink, <i>Acta Cryst. E</i> , 2012, <b>68</b> , m319,<br>DOI: <a href="https://doi.org/10.1107/S160053681200671X">10.1107/S160053681200671X</a>                                                      | Zn(II)  |
| 130 | LAQWOS  | $[\text{Eu}(\text{tpt})(\text{tdf})_3]$                                                                                                                                                                                       | <b>A</b> | P.G. Jones, S. Schaumburg, W. Kowalsky, H.-H. Johannes, <i>CSD Communication</i> , 2017.                                                                                                                                                 | Eu(III) |
| 131 | LIBWUP  | $[\text{Mn}(\text{tpt})(\text{SCN})_2(\text{H}_2\text{O})] \cdot \text{dmf}$                                                                                                                                                  | <b>A</b> | X.-P. Sun, W. Gu, X. Liu, <i>Acta Cryst. E</i> , 2007, <b>63</b> , m1027,<br>DOI: <a href="https://doi.org/10.1107/S1600536807010768">10.1107/S1600536807010768</a>                                                                      | Mn(II)  |
| 132 | LOFNUS  | $[\text{Y}(\text{tpt})(\text{SCN})_3(\text{H}_2\text{O})_2]_2 \cdot \text{tpt} \cdot 3.5\text{H}_2\text{O}$                                                                                                                   | <b>A</b> | S.P. Petrosyants, A.B. Ilyukhin, A.V. Gavrikov, N.N. Efimov, <i>Russ. J. Coord. Chem. (Koordinatsionnaia khimiia)</i> , 2018, <b>44</b> , 745,<br>DOI: <a href="https://doi.org/10.1134/S1070328418120060">10.1134/S1070328418120060</a> | Y(III)  |
| 133 | LOFPAA  | $[\text{Y}(\text{tpt})(\text{SCN})_2(\text{H}_2\text{O})_3](\text{SCN}) \cdot \text{tpt} \cdot 1.25\text{MeOH} \cdot 1.5\text{H}_2\text{O}$                                                                                   | <b>A</b> |                                                                                                                                                                                                                                          | Y(III)  |
| 134 | LOFPEE  | $[\text{Y}(\text{tpt})(\text{SCN})_2(\text{H}_2\text{O})_3]_5[\text{Y}(\text{tpt})(\text{SCN})_3(\text{H}_2\text{O})_2]_5[\text{Y}(\text{tpt})(\text{SCN})_4(\text{H}_2\text{O})_2](\text{SCN})_3 \cdot 37\text{H}_2\text{O}$ | <b>A</b> |                                                                                                                                                                                                                                          | Y(III)  |
| 135 | LOFPPII | $[\text{Y}(\text{tpt})_2(\text{SCN})_3] \cdot \text{MeCN}$                                                                                                                                                                    | <b>A</b> |                                                                                                                                                                                                                                          | Y(III)  |
| 136 | LOSDAZ  | $[\text{Mn}(\text{tpt})(\text{CF}_3\text{CO}_2)(\text{H}_2\text{O})_2]\text{CF}_3\text{CO}_2$                                                                                                                                 | <b>A</b> | K.M. Lo, S.W. Ng, <i>Acta Cryst. E</i> , 2009, <b>65</b> , m591,<br>DOI: <a href="https://doi.org/10.1107/S1600536809015098">10.1107/S1600536809015098</a>                                                                               | Mn(II)  |
| 137 | METJUR  | $[\text{Eu}(\text{tpt})(\text{hfac})_2(\text{EtOH})(\text{H}_2\text{O})]\text{CF}_3\text{CO}_2 \cdot \text{EtOH} \cdot \text{H}_2\text{O}$                                                                                    | <b>A</b> | C.R. De Silva, R. Wang, Zh. Zheng, <i>Polyhedron</i> , 2006, <b>25</b> , 3449,<br>DOI: <a href="https://doi.org/10.1016/j.poly.2006.06.032">10.1016/j.poly.2006.06.032</a>                                                               | Eu(III) |
| 138 | METKAY  | $[\text{Eu}(\text{tpt})(\text{hfac})] \cdot \text{EtOH}$                                                                                                                                                                      | <b>A</b> |                                                                                                                                                                                                                                          | Eu(III) |
| 139 | METKOM  | $[\text{Mn}_2(\text{tpt})_2(\text{dca})_2(\text{H}_2\text{O})_2](\text{ClO}_4)_2$                                                                                                                                             | <b>A</b> | G.-Y. Hsu, P. Misra, Sh.-Ch. Cheng, H.-H. Wei, S. Mohanta, <i>Polyhedron</i> , 2006, <b>25</b> , 3393,<br>DOI: <a href="https://doi.org/10.1016/j.poly.2006.06.019">10.1016/j.poly.2006.06.019</a>                                       | Mn(II)  |

|     |                        |                                                                                                                                  |   |                                                                                                                                                                                                                                                                                                                                                               |         |
|-----|------------------------|----------------------------------------------------------------------------------------------------------------------------------|---|---------------------------------------------------------------------------------------------------------------------------------------------------------------------------------------------------------------------------------------------------------------------------------------------------------------------------------------------------------------|---------|
| 140 | MOFJEY                 | $\{[\text{Cd}_2(\text{tpt})(\text{pdc})(\text{Cl})_2] \cdot 2\text{H}_2\text{O}\}_n$                                             | A | X. Jing, L. Ya, <i>Chinese J. Struct. Chem.</i> , 2014, <b>33</b> , 345                                                                                                                                                                                                                                                                                       | Cd(II)  |
| 141 | MUZZAL                 | $[\text{NpO}_2(\text{tpt})(\text{fa})(\text{H}_2\text{O})] \cdot 3\text{H}_2\text{O}$                                            | A | G. Andreev, N. Budantseva, <i>ChemistrySelect</i> , 2020, <b>5</b> , 14217, DOI: <a href="https://doi.org/10.1002/slct.202004025">10.1002/slct.202004025</a>                                                                                                                                                                                                  | Np(V)   |
| 142 | NAVDOD                 | $[\text{Ru}(\text{tpt})_2](\text{PF}_6)_2 \cdot \text{H}_2\text{O}$                                                              | A | P. Paul, B. Tyagi, M.M. Bhadbhade, E. Suresh, <i>J. Chem. Soc., Dalton Trans.</i> , 1997, 2273, DOI: <a href="https://doi.org/10.1039/a608433h">10.1039/a608433h</a>                                                                                                                                                                                          | Ru(II)  |
| 143 | NAXLIJ                 | $[\text{Ni}(\text{tpt})(\text{Cl})_2(\text{MeOH})] \cdot 0.5\text{Et}_2\text{O}$                                                 | A | H. Hadadzadeh, M. Maghami, J. Simpson, A.D. Khalaji, K. Abdi, <i>J. Chem. Crystallogr.</i> , 2012, <b>42</b> , 656, DOI: <a href="https://doi.org/10.1007/s10870-012-0296-7">10.1007/s10870-012-0296-7</a>                                                                                                                                                    | Ni(II)  |
| 144 | NAXLOP                 | $[\text{Cu}(\text{tpt})_2](\text{PF}_6)_2 \cdot \text{MeCN}$                                                                     | A | K. Abdi, H. Hadadzadeh, M. Salimi, J. Simpson, A.D. Khalaji, <i>Polyhedron</i> , 2012, <b>44</b> , 101, DOI: <a href="https://doi.org/10.1016/j.poly.2012.06.089">10.1016/j.poly.2012.06.089</a>                                                                                                                                                              | Cu(II)  |
| 145 | NEXPOY                 | $\{[\text{Zn}(\text{tpt})(\text{fum})] \cdot \text{dmf}\}_n$                                                                     | A | P. Abdolaliana, A. Morsali, G. Bruno, <i>Ultrason. Sonochem.</i> , 2017, <b>37</b> , 654, DOI: <a href="https://doi.org/10.1016/j.ultsonch.2017.02.023">10.1016/j.ultsonch.2017.02.023</a>                                                                                                                                                                    | Zn(II)  |
| 146 | NILNEC                 | $[\text{Ag}_2(\text{tpt})(\text{dppm})_2(\text{MeCN})](\text{SbF}_6)_2 \cdot 2\text{MeCN} \cdot 2\text{H}_2\text{O}$             | B | H.-W. Xu, J.-x. Li, P. Pin, Zh.-N. Chen, J.-g. Wu, <i>Transition Met. Chem.</i> , 2007, <b>32</b> , 839, DOI: <a href="https://doi.org/10.1007/s11243-007-0270-y">10.1007/s11243-007-0270-y</a>                                                                                                                                                               | Ag(I)   |
| 147 | NILNIG                 | $[\text{Ag}_2(\text{tpt})_2(\text{dppm})_2](\text{SbF}_6)_2 \cdot 1.75\text{H}_2\text{O}$                                        | B |                                                                                                                                                                                                                                                                                                                                                               | Ag(I)   |
| 148 | NILNOM                 | $[\text{Ag}_2(\text{tpt})_2(\text{dppm})](\text{SbF}_6)_2 \cdot 2\text{MeCN}$                                                    | A |                                                                                                                                                                                                                                                                                                                                                               | Ag(I)   |
| 149 | NIZMAN                 | $[\text{Ni}(\text{tpt})(\text{NCS})_2(\text{MeOH})] \cdot \text{MeOH}$                                                           | A | K. Ha, <i>IUCrData</i> , 2019, 4, x190169, DOI: <a href="https://doi.org/10.1107/S241431461900169X">10.1107/S241431461900169X</a>                                                                                                                                                                                                                             | Ni(II)  |
| 150 | NUDGUQ                 | $[\text{Tb}(\text{tpt})(\text{NO}_3)_2(\text{EtO})(\text{Cl})] \cdot \text{EtOH}$                                                | A | Zh. Dan, <i>CSD Communication</i> , 2015.                                                                                                                                                                                                                                                                                                                     | Tb(III) |
| 151 | NUDHAX                 | $\{[\text{Gd}(\text{tpt})(\text{ta})(\text{Cl})] \cdot 0.5\text{H}_2\text{ta}\}_n$                                               | A |                                                                                                                                                                                                                                                                                                                                                               | Gd(III) |
| 152 | NUDHEB                 | $\{[\text{Zn}(\text{tpt})(\text{ta})(\text{Cl})] \cdot 3\text{H}_2\text{O}\}_n$                                                  | A |                                                                                                                                                                                                                                                                                                                                                               | Zn(II)  |
| 153 | OCEVEY                 | $[\text{Ru}(\text{tpt})(\text{acac})(\text{ce})]\text{ClO}_4 \cdot 2\text{H}_2\text{O}$                                          | A | S. Ghumaan, S. Kar, S.M. Mobin, B. Harish, V.G. Puranik, G.K. Lahiri, <i>Inorg. Chem.</i> , 2006, <b>45</b> , 2413, DOI: <a href="https://doi.org/10.1021/ic0514288">10.1021/ic0514288</a>                                                                                                                                                                    | Ru(II)  |
| 154 | OCEVIC                 | $[\text{Ru}(\text{tpt})(\text{acac})(\text{ta})]\text{ClO}_4 \cdot 2\text{H}_2\text{O}$                                          | A |                                                                                                                                                                                                                                                                                                                                                               | Ru(II)  |
| 155 | OCEVOI                 | $[\text{Ru}(\text{tpt})(\text{acac})(\text{MeCN})]\text{ClO}_4 \cdot 2\text{H}_2\text{O}$                                        | A |                                                                                                                                                                                                                                                                                                                                                               | Ru(II)  |
| 156 | OFONEZ                 | $\{[\text{Ni}(\text{tpt})(\text{Hbtb})] \cdot 0.7\text{dmf}\}_n$                                                                 | A | D. Sensharma, P. Wix, A.Ch. Kathalikkattil, W. Schmitt, <i>CrystEngComm</i> , 2018, <b>20</b> , 5127, DOI: <a href="https://doi.org/10.1039/C8CE01211C">10.1039/C8CE01211C</a>                                                                                                                                                                                | Ni(II)  |
| 157 | OFOHID                 | $\{[\text{Cd}(\text{tpt})(\text{Hbtb})] \cdot \text{dmf}\}_n$                                                                    | A |                                                                                                                                                                                                                                                                                                                                                               | Cd(II)  |
| 158 | OFOREE                 | $\{[\text{Zn}(\text{tpt})(\text{Hbtb})] \cdot \text{dmf}\}_n$                                                                    | A |                                                                                                                                                                                                                                                                                                                                                               | Zn(II)  |
| 159 | OFOIII                 | $\{[\text{Mn}(\text{tpt})(\text{Hbtb})] \cdot 1.25\text{dmf}\}_n$                                                                | A |                                                                                                                                                                                                                                                                                                                                                               | Mn(II)  |
| 160 | OGAZEE                 | $[\text{Mn}(\text{tpt})(\text{NO}_3)(\text{MeOH})_2]\text{NO}_3$                                                                 | A | K.N. Lazarou, I. Stamatopoulos, V. Psycharis, C. Duboc, C.P. Raptopoulou, Y. Sanakis, <i>Polyhedron</i> , 2018, <b>155</b> , 291, DOI: <a href="https://doi.org/10.1016/j.poly.2018.08.014">10.1016/j.poly.2018.08.014</a>                                                                                                                                    | Mn(II)  |
| 161 | OGAZII                 | $[\text{Mn}(\text{tpt})(\text{NO}_3)_2(\text{MeOH})]$                                                                            | A |                                                                                                                                                                                                                                                                                                                                                               | Mn(II)  |
| 162 | OGEBAG                 | $[\text{Mn}(\text{tpt})(\text{MeCN})(\text{H}_2\text{O})_2](\text{ClO}_4)_2$                                                     | A |                                                                                                                                                                                                                                                                                                                                                               | Mn(II)  |
| 163 | OGUCEA                 | $[\text{Tb}(\text{tpt})(\text{Br-ba})_3(\text{H}_2\text{O})] \cdot \text{H}_2\text{O}$                                           | A | C. Wang, J. Kang, X. Zhang, Y. Zhao, H. Chu, <i>J. Lumin.</i> , 2019, <b>215</b> , 116638, DOI: <a href="https://doi.org/10.1016/j.jlumin.2019.116638">10.1016/j.jlumin.2019.116638</a>                                                                                                                                                                       | Tb(III) |
| 164 | OHACIK<br>OHACIK0<br>1 | $[\text{Ag}(\text{tpt})(\text{NO}_3)]_n$                                                                                         | D | Ch. Yan, L. Chen, R. Feng, F. Jiang, M. Hong, <i>CrystEngComm</i> , 2009, <b>11</b> , 2529, DOI: <a href="https://doi.org/10.1039/b909549g">10.1039/b909549g</a><br>G. Meyer, M. Sehabi, I. Pantenburg, <i>Design and Construction of Coordination Polymers</i> , Wiley, 2009, DOI: <a href="https://doi.org/10.1002/9780470467336">10.1002/9780470467336</a> | Ag(I)   |
| 165 | OHACOQ                 | $\{[\text{Ag}_2(\text{tpt})(\text{Ph}_3\text{P})_3(\text{NO}_3)(\text{H}_2\text{O})](\text{NO}_3) \cdot 2\text{H}_2\text{O}\}_n$ | G | Ch. Yan, L. Chen, R. Feng, F. Jiang, M. Hong, <i>CrystEngComm</i> , 2009, <b>11</b> , 2529, DOI: <a href="https://doi.org/10.1039/b909549g">10.1039/b909549g</a>                                                                                                                                                                                              | Ag(I)   |
| 166 | OHACUW                 | $[\text{Ag}_4(\text{tpt})_2(\text{CN})(\text{NO}_3)_2]\text{NO}_3$                                                               | D |                                                                                                                                                                                                                                                                                                                                                               | Ag(I)   |
| 167 | OMUVIC                 | $[\text{Zn}(\text{tpt})(\text{NO}_3)(\text{H}_2\text{O})_2]\text{NO}_3$                                                          | A | Ch. Yan, Q. Chen, L. Chen, R. Feng, X.                                                                                                                                                                                                                                                                                                                        | Zn(II)  |



|     |          |                                                                                                                                                |   |                                                                                                                                                                                                                                                                |                                                                                                                                                                                                       |         |
|-----|----------|------------------------------------------------------------------------------------------------------------------------------------------------|---|----------------------------------------------------------------------------------------------------------------------------------------------------------------------------------------------------------------------------------------------------------------|-------------------------------------------------------------------------------------------------------------------------------------------------------------------------------------------------------|---------|
| 168 | OMUVOI   | [Zn <sub>2</sub> (tpt) <sub>2</sub> (4,4'-bpy)(H <sub>2</sub> O) <sub>4</sub> ](NO <sub>3</sub> ) <sub>4</sub> ·4H <sub>2</sub> O              | A | Shan, F. Jiang, M. Hong, <i>Aust. J. Chem.</i> , 2011, <b>64</b> , 104, DOI: <a href="https://doi.org/10.1071/CH10175">10.1071/CH10175</a>                                                                                                                     | Zn(II)                                                                                                                                                                                                |         |
| 169 | OMUVUO   | [Zn(tpt)(MeCO <sub>2</sub> ) <sub>2</sub> ].5H <sub>2</sub> O                                                                                  | A |                                                                                                                                                                                                                                                                | Zn(II)                                                                                                                                                                                                |         |
| 170 | ORESIO   | [Cd(tpt)(sal) <sub>2</sub> (H <sub>2</sub> O)].H <sub>2</sub> O                                                                                | A | G. Wu, X.-F. Wang, L. Guo, H.-H. Li, <i>J. Chem. Crystallogr.</i> , 2011, <b>41</b> , 1071, DOI: <a href="https://doi.org/10.1007/s10870-011-0048-0">10.1007/s10870-011-0048-0</a>                                                                             | Cd(II)                                                                                                                                                                                                |         |
| 171 | ORESOU   | [Zn(tpt)(sal) <sub>2</sub> ].H <sub>2</sub> O                                                                                                  | A |                                                                                                                                                                                                                                                                | Zn(II)                                                                                                                                                                                                |         |
| 172 | PANTEY   | [Zn(tpt)(SO <sub>4</sub> )(H <sub>2</sub> O) <sub>2</sub> ].2H <sub>2</sub> O                                                                  | A | M.A. Harvey, S. Baggio, R. Baggio, <i>Acta Cryst. C</i> , 2004, <b>60</b> , m498, DOI: <a href="https://doi.org/10.1107/S0108270104019821">10.1107/S0108270104019821</a>                                                                                       | Zn(II)                                                                                                                                                                                                |         |
| 173 | PIDKUJ   | [Co(tpt)(SCN) <sub>2</sub> (H <sub>2</sub> O)]                                                                                                 | A | X.-P. Sun, W. Gu, X. Liu, <i>Acta Cryst. E</i> , 2007, <b>63</b> , m1339, DOI: <a href="https://doi.org/10.1107/S1600536807013335">10.1107/S1600536807013335</a>                                                                                               | Co(II)                                                                                                                                                                                                |         |
| 174 | PIPXIX   | [Eu <sub>2</sub> (tpt) <sub>2</sub> (poa) <sub>6</sub> ].2MeOH                                                                                 | A | A. Wang, X. Wei, H. Zhang, B. Yue, Y. Qu, J. Kang, Zh. Wang, H. Chu, Y. Zhao, <i>Dalton Trans.</i> , 2014, <b>43</b> , 2620, DOI: <a href="https://doi.org/10.1039/C3DT53068J">10.1039/C3DT53068J</a>                                                          | Eu(III)                                                                                                                                                                                               |         |
| 175 | PIPXOD   | [EuGd(tpt) <sub>2</sub> (poa) <sub>6</sub> ].2MeOH                                                                                             | A |                                                                                                                                                                                                                                                                | Eu(III), Gd(III)                                                                                                                                                                                      |         |
| 176 | PUDKEG   | [Mn <sub>3</sub> (tpt) <sub>2</sub> (MeCO <sub>2</sub> ) <sub>6</sub> ]                                                                        | A | Y.-Zh. Zhang, H.-H. Zhao, E. Funck, K.R. Dunbar, <i>Angew. Chem., Int. Ed.</i> , 2015, <b>54</b> , 5583, DOI: <a href="https://doi.org/10.1002/anie.201410664">10.1002/anie.201410664</a>                                                                      | Mn(II)                                                                                                                                                                                                |         |
| 177 | PUXZIS   | [Ag <sub>2</sub> (tpt)(NO <sub>3</sub> ) <sub>2</sub> ] <sub>n</sub>                                                                           | C | M.M. Najafpour, M. Holynska, M. Amini, S.H. Kazemi, T. Lis, M. Bagherzadeh, <i>Polyhedron</i> , 2010, <b>29</b> , 2837, DOI: <a href="https://doi.org/10.1016/j.poly.2010.07.005">10.1016/j.poly.2010.07.005</a>                                               | Ag(I)                                                                                                                                                                                                 |         |
| 178 | PUXZOY   | [Ag <sub>5</sub> (tpt)](NO <sub>3</sub> ) <sub>5</sub> ·7H <sub>2</sub> O                                                                      | J |                                                                                                                                                                                                                                                                | Ag(I)                                                                                                                                                                                                 |         |
| 179 | PYPRTZ10 | [Ni(Htpt)(H <sub>2</sub> O) <sub>3</sub> ]Br <sub>3</sub> ·H <sub>2</sub> O                                                                    | A | G.A. Barclay, R.S. Vagg, E.C. Watton, <i>Acta Cryst. B</i> , 1977, <b>33</b> , 3487, DOI: <a href="https://doi.org/10.1107/S0567740877011261">10.1107/S0567740877011261</a>                                                                                    | Ni(II)                                                                                                                                                                                                |         |
| 180 | QEFNIA   | [Ce(tpt)(I) <sub>3</sub> (MeCN) <sub>2</sub> ].1.5MeCN                                                                                         | A | J.-C. Berthet, J.-M. Onno, F. Gupta, C. Riviere, P. Thuery, M. Nierlich, C. Madic, M. Ephritikhine, <i>Polyhedron</i> , 2012, <b>45</b> , 107, DOI: <a href="https://doi.org/10.1016/j.poly.2012.07.040">10.1016/j.poly.2012.07.040</a>                        | Ce(III)                                                                                                                                                                                               |         |
| 181 | QEFNOG   | [Ce(tpt) <sub>2</sub> (CF <sub>3</sub> SO <sub>3</sub> ) <sub>3</sub> ].MeCN·Et <sub>2</sub> O                                                 | A |                                                                                                                                                                                                                                                                | Ce(III)                                                                                                                                                                                               |         |
| 182 | QEFNUM   | [Nd(tpt) <sub>2</sub> (I) <sub>2</sub> (Py)]I·3.5Py                                                                                            | A |                                                                                                                                                                                                                                                                | Nd(III)                                                                                                                                                                                               |         |
| 183 | QEFPAU   | [Ce(tpt) <sub>2</sub> (I) <sub>2</sub> (H <sub>2</sub> O)]I·2.5Py                                                                              | A |                                                                                                                                                                                                                                                                | Ce(III)                                                                                                                                                                                               |         |
| 184 | QEFPEY   | [Ce(tpt) <sub>2</sub> (I) <sub>3</sub> ].0.7(MeCN)                                                                                             | A |                                                                                                                                                                                                                                                                | Ce(III)                                                                                                                                                                                               |         |
| 185 | QEFPIC   | [Ce <sub>2</sub> (OH) <sub>2</sub> (tpt) <sub>4</sub> (I) <sub>2</sub> ](I) <sub>3</sub> ·2MeCN                                                | A |                                                                                                                                                                                                                                                                | Ce(III)                                                                                                                                                                                               |         |
| 186 | QEFPOI   | [Ce(tpt) <sub>3</sub> (I)]I <sub>2</sub> ·2MeCN                                                                                                | A |                                                                                                                                                                                                                                                                | Ce(III)                                                                                                                                                                                               |         |
| 187 | QEFPUO   | [U(tpt) <sub>2</sub> (CF <sub>3</sub> SO <sub>3</sub> ) <sub>3</sub> ].2Py                                                                     | A |                                                                                                                                                                                                                                                                | U(III)                                                                                                                                                                                                |         |
| 188 | QEFQAV   | [U <sub>2</sub> (tpt) <sub>4</sub> (CF <sub>3</sub> SO <sub>3</sub> ) <sub>6</sub> ].2Py                                                       | A |                                                                                                                                                                                                                                                                | U(III)                                                                                                                                                                                                |         |
| 189 | QEFQEZ   | [U <sub>3</sub> O <sub>3</sub> (tpt) <sub>3</sub> (CF <sub>3</sub> SO <sub>3</sub> ) <sub>6</sub> (Py) <sub>2</sub> ].3Py·0.5Et <sub>2</sub> O | A |                                                                                                                                                                                                                                                                | U(III)                                                                                                                                                                                                |         |
| 190 | QEFQID   | [Ce(tpt) <sub>2</sub> (CF <sub>3</sub> SO <sub>3</sub> ) <sub>3</sub> ].2Py                                                                    | A |                                                                                                                                                                                                                                                                | Ce(III)                                                                                                                                                                                               |         |
| 191 | QEZHIM   | [Fe <sub>2</sub> O(tpt) <sub>2</sub> (dca) <sub>2</sub> (NO <sub>3</sub> ) <sub>2</sub> ]                                                      | A |                                                                                                                                                                                                                                                                | A. Majumder, G. Pilet, M.S. El Fallah, J. Ribas, S. Mitra, <i>Inorg. Chim. Acta</i> , 2007, <b>360</b> , 2307, DOI: <a href="https://doi.org/10.1016/j.ica.2006.11.015">10.1016/j.ica.2006.11.015</a> | Fe(III) |
| 192 | QIXSAU   | [Hg(tpt)(I) <sub>2</sub> ]                                                                                                                     | A |                                                                                                                                                                                                                                                                | Z. Yaghobi, Z.R. Ranjbar, S. Gharbi, <i>Polyhedron</i> , 2019, <b>164</b> , 176, DOI: <a href="https://doi.org/10.1016/j.poly.2019.02.039">10.1016/j.poly.2019.02.039</a>                             | Hg(II)  |
| 193 | QIXSEY   | [Cd(tpt)(Cl) <sub>2</sub> ]                                                                                                                    | A | Cd(II)                                                                                                                                                                                                                                                         |                                                                                                                                                                                                       |         |
| 194 | QOMQOZ   | [Fe(tpt)(NO <sub>3</sub> )(MeOH) <sub>2</sub> ]NO <sub>3</sub>                                                                                 | A | C.P. Raptopoulou, Y. Sanakis, A.K. Boudalis, <i>Eur. J. Inorg. Chem.</i> , 2008, 5632, DOI: <a href="https://doi.org/10.1002/ejic.200800560">10.1002/ejic.200800560</a>                                                                                        | Fe(II)                                                                                                                                                                                                |         |
| 195 | QOMQUF   | [Fe(Htpt) <sub>2</sub> ](ClO <sub>4</sub> ) <sub>4</sub>                                                                                       | A |                                                                                                                                                                                                                                                                | Fe(II)                                                                                                                                                                                                |         |
| 196 | QUQMAS   | [Eu(tpt)(tpip) <sub>3</sub> ]                                                                                                                  | A | M. Pietraszkiewicz, O. Pietraszkiewicz, J. Karpiuk, A. Majka, G. Dutkiewicz, T. Borowiak, A.M. Kaczmarek, R. Van Deun, <i>J. Lumin.</i> , 2016, <b>170</b> , 411, DOI: <a href="https://doi.org/10.1016/j.jlumin.2015.10.033">10.1016/j.jlumin.2015.10.033</a> | Eu(III)                                                                                                                                                                                               |         |

|     |                        |                                                                                                                        |   |                                                                                                                                                                                                                                                                                               |                  |
|-----|------------------------|------------------------------------------------------------------------------------------------------------------------|---|-----------------------------------------------------------------------------------------------------------------------------------------------------------------------------------------------------------------------------------------------------------------------------------------------|------------------|
| 197 | RADVIE                 | $\{\text{Na}[\text{UO}_2(\text{nda})_2](\text{Htpt})\cdot\text{H}_2\text{O}\}_n$                                       | A | S.G. Thangavelu, Ch.L. Cahill, <i>Cryst. Growth Des.</i> , 2016, <b>16</b> , 42, DOI: <a href="https://doi.org/10.1021/acs.cgd.5b00778">10.1021/acs.cgd.5b00778</a>                                                                                                                           | Na(I), U(IV)     |
| 198 | RAHSOK                 | $[\text{Mn}(\text{tpt})_2](\text{I}_3)_2$                                                                              | A | K. Ha, <i>Z. Kristallogr. NCS</i> , 2011, <b>226</b> , 483, DOI: <a href="https://doi.org/10.1524/ncrs.2011.0215">10.1524/ncrs.2011.0215</a>                                                                                                                                                  | Mn(II)           |
| 199 | RAQQUV                 | $\{[\text{Pb}(\text{tpt})(\text{NO}_3)_2]\cdot 2.4\text{H}_2\text{O}\}_n$                                              | A | J.M. Harrowfield, D.L. Kepert, H. Miyamae, B.W. Skelton, A.A. Soudi, A.H. White, <i>Aust. J. Chem.</i> , 1996, <b>49</b> , 1147, DOI: <a href="https://doi.org/10.1071/CH9961147">10.1071/CH9961147</a>                                                                                       | Pb(II)           |
| 200 | RAQRAC                 | $[\text{Pb}(\text{tpt})_2(\text{NO}_3)_2]\cdot\text{MeOH}$                                                             | A |                                                                                                                                                                                                                                                                                               | Pb(II)           |
| 201 | RAQREC                 | $[\text{Pb}(\text{tpt})_2(\text{NO}_3)_2]\cdot 6\text{H}_2\text{O}$                                                    | A |                                                                                                                                                                                                                                                                                               | Pb(II)           |
| 202 | RAQRIK                 | $\{[\text{Pb}(\text{tpt})(\text{Cl})_2]\cdot\text{MeOH}\}_n$                                                           | A | J.M. Harrowfield, H. Miyamae, B.W. Skelton, A.A. Soudi, A.H. White, <i>Aust. J. Chem.</i> , 1996, <b>49</b> , 1157, DOI: <a href="https://doi.org/10.1071/CH9961157">10.1071/CH9961157</a>                                                                                                    | Pb(II)           |
| 203 | RAQROQ                 | $\{[\text{Pb}(\text{tpt})(\text{Br})_2]\cdot\text{MeOH}\}_n$                                                           | A |                                                                                                                                                                                                                                                                                               | Pb(II)           |
| 204 | RAQRUW                 | $\{[\text{Pb}(\text{tpt})(\text{I})_2]\cdot\text{MeOH}\}_n$                                                            | A |                                                                                                                                                                                                                                                                                               | Pb(II)           |
| 205 | RAQSAD                 | $[\text{Pb}(\text{tpt})(\text{SCN})_2]_n$                                                                              | A |                                                                                                                                                                                                                                                                                               | Pb(II)           |
| 206 | RAQZAM                 | $[\text{Mn}(\text{tpt})(\text{H}_2\text{O})_3](\text{CF}_3\text{SO}_3)_2\cdot\text{MeOH}$                              | A | M.M. Najafpour, M. Holynska, A.N. Shamkhali, M. Amini, S.H. Kazemi, S. Zaynalpoor, R. Mohamadi, M. Bagherzadeh, T. Lis, <i>Polyhedron</i> , 2012, <b>34</b> , 202, DOI: <a href="https://doi.org/10.1016/j.poly.2011.12.027">10.1016/j.poly.2011.12.027</a>                                   | Mn(II)           |
| 207 | RAQZEQ                 | $[\text{Mn}(\text{tpt})(\text{MeCO}_2)(\text{H}_2\text{O})_2](\text{CF}_3\text{SO}_3)\cdot 3\text{H}_2\text{O}$        | A |                                                                                                                                                                                                                                                                                               | Mn(II)           |
| 208 | REHKUL                 | $[\text{Ni}(\text{tpt})(\text{SO}_4)(\text{H}_2\text{O})_2]\cdot 2\text{H}_2\text{O}$                                  | A | M.E.D. de Vivar, S. Baggio, R. Baggio, <i>Acta Cryst. E</i> , 2006, <b>62</b> , m986, DOI: <a href="https://doi.org/10.1107/S1600536806011640">10.1107/S1600536806011640</a>                                                                                                                  | Ni(II)           |
| 209 | REHMEX                 | $[\text{Fe}_2\text{O}(\text{tpt})_2(\text{Cl})_4]\cdot 2\text{H}_2\text{O}$                                            | A | R. Zibaseresht, W.T. Robinson, R.M. Hartshorn, <i>Acta Cryst. E</i> , 2006, <b>62</b> , m1150, DOI: <a href="https://doi.org/10.1107/S1600536806014437">10.1107/S1600536806014437</a>                                                                                                         | Fe(III)          |
| 210 | REYQAQ                 | $\{[\text{Pr}(\text{tpt})(\text{H}_2\text{O})_4\text{Fe}(\text{CN})_6]\cdot 8\text{H}_2\text{O}\}_n$                   | A | H. Zhao, N. Lopez, A. Prosvirin, H.T. Chifotides, K.R. Dunbar, <i>Dalton Trans.</i> , 2007, 878, DOI: <a href="https://doi.org/10.1039/b616016f">10.1039/b616016f</a>                                                                                                                         | Pr(III), Fe(III) |
| 211 | REYQES                 | $\{[\text{Nd}(\text{tpt})(\text{H}_2\text{O})_4\text{Fe}(\text{CN})_6]\cdot 8\text{H}_2\text{O}\}_n$                   | A |                                                                                                                                                                                                                                                                                               | Nd(III), Fe(III) |
| 212 | REYQIW                 | $\{[\text{Sm}(\text{tpt})(\text{H}_2\text{O})_4\text{Fe}(\text{CN})_6]\cdot 8\text{H}_2\text{O}\}_n$                   | A |                                                                                                                                                                                                                                                                                               | Sm(III), Fe(III) |
| 213 | REYQOC                 | $\{[\text{Eu}(\text{tpt})(\text{H}_2\text{O})_4\text{Fe}(\text{CN})_6]\cdot 6\text{H}_2\text{O}\}_n$                   | A |                                                                                                                                                                                                                                                                                               | Eu(III), Fe(III) |
| 214 | REYQUI                 | $\{[\text{Gd}(\text{tpt})(\text{H}_2\text{O})_4\text{Fe}(\text{CN})_6]\cdot 6\text{H}_2\text{O}\}_n$                   | A |                                                                                                                                                                                                                                                                                               | Gd(III), Fe(III) |
| 215 | REYRAP                 | $\{[\text{Tb}(\text{tpt})(\text{H}_2\text{O})_4\text{Fe}(\text{CN})_6]\cdot 8\text{H}_2\text{O}\}_n$                   | A |                                                                                                                                                                                                                                                                                               | Tb(III), Fe(III) |
| 216 | REYRET                 | $\{[\text{Sm}(\text{tpt})(\text{H}_2\text{O})_4\text{Co}(\text{CN})_6]\cdot 8\text{H}_2\text{O}\}_n$                   | A |                                                                                                                                                                                                                                                                                               | Sm(III), Co(III) |
| 217 | REYRIX                 | $\{[\text{La}(\text{tpt})(\text{dmf})(\text{H}_2\text{O})_3\text{Fe}(\text{CN})_6]\cdot 5\text{H}_2\text{O}\}_n$       | A |                                                                                                                                                                                                                                                                                               | La(III), Fe(III) |
| 218 | RUBMEH                 | $[\text{Mn}_2(\text{tpt})_2(\text{Cl})_4]\cdot 2\text{MeCN}$                                                           | A | P. Tyagi, U.P. Singh, <i>J. Coord. Chem.</i> , 2009, <b>62</b> , 1613, DOI: <a href="https://doi.org/10.1080/00958970802680682">10.1080/00958970802680682</a>                                                                                                                                 | Mn(II)           |
| 219 | RUBMIL                 | $[\text{Mn}(\text{tpt})(\text{MeCO}_2)(\text{N}_3)(\text{H}_2\text{O})]\cdot\text{H}_2\text{O}$                        | A |                                                                                                                                                                                                                                                                                               | Mn(II)           |
| 220 | RUKNOD                 | $[\text{Cu}(\text{tpt})(\text{Cl})_2]\cdot 2\text{H}_2\text{O}$                                                        | A | K. Abdi, H. Hadadzadeh, M. Weil, H.A. Rudbari, <i>Inorg. Chim. Acta</i> , 2014, <b>416</b> , 109, DOI: <a href="https://doi.org/10.1016/j.ica.2014.03.021">10.1016/j.ica.2014.03.021</a>                                                                                                      | Cu(II)           |
| 221 | RUSNID<br>RUSNID0<br>1 | $[\text{Mn}(\text{tpt})(\text{Cl})_2]$                                                                                 | A | K. Ha, <i>Acta Cryst. E</i> , 2010, <b>66</b> , m262, DOI: <a href="https://doi.org/10.1107/S1600536810004204">10.1107/S1600536810004204</a><br>K. Ha, <i>Acta Cryst. E</i> , 2011, <b>67</b> , m1306, DOI: <a href="https://doi.org/10.1107/S1600536811034118">10.1107/S1600536811034118</a> | Mn(II)           |
| 222 | SOBWEO                 | $\{[\text{Fe}^{\text{II}}(\text{tpt})]_2[\text{Fe}^{\text{III}}(\text{Tp}^*)(\text{CN})_3]_4\}\cdot\text{H}_2\text{O}$ | A |                                                                                                                                                                                                                                                                                               | Fe(III), Fe(II)  |
| 223 | SOCDOG                 | $\{[\text{Co}^{\text{II}}(\text{tpt})]_2[\text{Fe}^{\text{III}}(\text{Tp}^*)(\text{CN})_3]_4\}\cdot\text{H}_2\text{O}$ | A | 2019, <b>6</b> , 493,                                                                                                                                                                                                                                                                         | Co(II),          |

|     |        |                                                                                                                                                                                              |   |                                                                                                                                                                                                       |                    |
|-----|--------|----------------------------------------------------------------------------------------------------------------------------------------------------------------------------------------------|---|-------------------------------------------------------------------------------------------------------------------------------------------------------------------------------------------------------|--------------------|
|     |        |                                                                                                                                                                                              |   | DOI: <a href="https://doi.org/10.1039/C8QI01245H">10.1039/C8QI01245H</a>                                                                                                                              | Fe(III)            |
| 224 | SOCDUM | $\{[\text{Ni}^{\text{II}}(\text{tpt})]_2[\text{Fe}^{\text{III}}(\text{Tp}^*)(\text{CN})_3]_4\} \cdot 2\text{MeOH} \cdot 4\text{H}_2\text{O}$                                                 | A |                                                                                                                                                                                                       | Ni(II),<br>Fe(III) |
| 225 | SOZHIA | $\{[(\text{tpt})\text{Mn}^{\text{II}}(\text{H}_2\text{O})\text{Mn}^{\text{III}}(\text{CN})_6]_2\text{Mn}^{\text{II}}(\text{H}_2\text{O})_2 \cdot 4\text{MeOH} \cdot 2\text{H}_2\text{O}\}_n$ | A | Y.-Zh. Zhang, H.-H. Zhao, E. Funck, K.R. Dunbar, <i>Angew. Chem., Int. Ed.</i> , 2015, <b>54</b> , 5583, DOI: <a href="https://doi.org/10.1002/anie.201410664">10.1002/anie.201410664</a>             | Mn(II),<br>Mn(III) |
| 226 | TABDOP | $[\text{Co}(\text{tpt})_2]_2 \cdot 2\text{H}_2\text{O}$                                                                                                                                      | A | B.N. Figgis, E.S. Kucharski, S. Mitra, B.W. Skelton, A.H. White, <i>Aust. J. Chem.</i> , 1990, <b>43</b> , 1269, DOI: <a href="https://doi.org/10.1071/CH9901269">10.1071/CH9901269</a>               | Co(II)             |
| 227 | TABDUV | $[\text{Co}(\text{tpt})_2]_2 \cdot 3.75\text{H}_2\text{O}$                                                                                                                                   | A |                                                                                                                                                                                                       | Co(II)             |
| 228 | TANXIQ | $[\text{Ni}(\text{tpt})(\text{H}_2\text{O})_3]\text{Cl}_2 \cdot 3\text{H}_2\text{O}$                                                                                                         | A | R. Zibaseresht, R.M. Hartshorn, <i>Aust. J. Chem.</i> , 2005, <b>58</b> , 345, DOI: <a href="https://doi.org/10.1071/CH04280">10.1071/CH04280</a>                                                     | Ni(II)             |
| 229 | TANXOW | $[\text{Ni}(\text{tpt})(\text{Cl})(\text{H}_2\text{O})_2][\text{Ni}(\text{tpt})(\text{Cl})_2(\text{H}_2\text{O})]\text{Cl} \cdot 4\text{H}_2\text{O}$                                        | A |                                                                                                                                                                                                       | Ni(II)             |
| 230 | TANXUC | $[\text{Ni}(\text{Htpt})(\text{Cl})(\text{H}_2\text{O})_2]\text{Cl}_2 \cdot 2\text{H}_2\text{O}$                                                                                             | A |                                                                                                                                                                                                       | Ni(II)             |
| 231 | TANYAJ | $[\text{Ni}(\text{tpt})(\text{H}_2\text{O})_3](\text{NO}_3)_2$                                                                                                                               | A |                                                                                                                                                                                                       | Ni(II)             |
| 232 | TANYEN | $[\text{Ni}(\text{tpt})_2](\text{ClO}_4)_2$                                                                                                                                                  | A |                                                                                                                                                                                                       | Ni(II)             |
| 233 | TANYIR | $[\text{Ni}_2(\text{tpt})(\text{NO}_3)_3(\text{EtOH})_2(\text{H}_2\text{O})]\text{NO}_3$                                                                                                     | C |                                                                                                                                                                                                       | Ni(II)             |
| 234 | TCAZCO | $\{[\text{Co}_2(\text{tpt})(\text{Cl})_4(\text{H}_2\text{O})] \cdot \text{H}_2\text{O}\}_n$                                                                                                  | D | G.A. Barclay, R.S. Vagg, E.C. Watton, <i>Acta Cryst. B</i> , 1978, <b>34</b> , 1833, DOI: <a href="https://doi.org/10.1107/S0567740878006780">10.1107/S0567740878006780</a>                           | Co(II)             |
| 235 | TEPLUV | $[\text{Ni}(\text{Htpt})(\text{H}_2\text{O})_3](\text{NO}_3)_3 \cdot \text{H}_2\text{O}$                                                                                                     | A | P. Byers, G.Y.S. Chan, M.G.B. Drew, M.J. Hudson, C. Madic, <i>Polyhedron</i> , 1996, <b>15</b> , 2845, DOI: <a href="https://doi.org/10.1016/0277-5387(95)00588-9">10.1016/0277-5387(95)00588-9</a>   | Ni(II)             |
| 236 | TEQKUW | $[\text{Cu}(\text{tpt})(\text{ox})(\text{H}_2\text{O})] \cdot 4\text{H}_2\text{O}$                                                                                                           | A | Y.-Q. Zheng, W. Xu, F. Lin, G.-S. Fang, <i>J. Coord. Chem.</i> , 2006, <b>59</b> , 1825, DOI: <a href="https://doi.org/10.1080/00958970600571760">10.1080/00958970600571760</a>                       | Cu(II)             |
| 237 | TEXJAK | $[\text{Zn}(\text{tpt})(\text{Cl})_2]$                                                                                                                                                       | A | G.B. Güven, <i>CSD Communication</i> , 2018.                                                                                                                                                          | Zn(II)             |
| 238 | TOGLIM | $[\text{Nd}_2(\text{tpt})_2(\text{bpdc})_3(\text{H}_2\text{O})] \cdot 3\text{dma} \cdot 7\text{H}_2\text{O}$                                                                                 | A | J.-H. Liao, W.-Sh. Hwang, G.-Y. Chen, <i>Z. Anorg. Allg. Chem.</i> , 2014, <b>640</b> , 1793, DOI: <a href="https://doi.org/10.1002/zaac.201300619">10.1002/zaac.201300619</a>                        | Nd(III)            |
| 239 | TOGLOS | $[\text{Sm}_2(\text{tpt})_2(\text{bpdc})_3(\text{H}_2\text{O})] \cdot 3\text{dma} \cdot 7\text{H}_2\text{O}$                                                                                 | A |                                                                                                                                                                                                       | Sm(III)            |
| 240 | TOGLUY | $[\text{Eu}_2(\text{tpt})_2(\text{bpdc})_3(\text{H}_2\text{O})] \cdot 3\text{dma} \cdot 7\text{H}_2\text{O}$                                                                                 | A |                                                                                                                                                                                                       | Eu(III)            |
| 241 | TOGMAF | $[\text{Gd}_2(\text{tpt})_2(\text{bpdc})_3(\text{H}_2\text{O})] \cdot 3\text{dma} \cdot 7\text{H}_2\text{O}$                                                                                 | A |                                                                                                                                                                                                       | Gd(III)            |
| 242 | TOGMEJ | $[\text{Tb}_2(\text{tpt})_2(\text{bpdc})_3(\text{H}_2\text{O})] \cdot 3\text{dma} \cdot 7\text{H}_2\text{O}$                                                                                 | A |                                                                                                                                                                                                       | Tb(III)            |
| 243 | TOGMIN | $[\text{Dy}_2(\text{tpt})_2(\text{bpdc})_3(\text{H}_2\text{O})] \cdot 3\text{dma} \cdot 7\text{H}_2\text{O}$                                                                                 | A |                                                                                                                                                                                                       | Dy(III)            |
| 244 | TOLKEN | $[\text{Ni}(\text{tpt})(\text{Py})(\text{Cl})_2]$                                                                                                                                            | A | K. Ha, <i>Z. Kristallogr. NCS</i> , 2019, <b>234</b> , 775, DOI: <a href="https://doi.org/10.1515/ncrs-2019-0098">10.1515/ncrs-2019-0098</a>                                                          | Ni(II)             |
| 245 | UJIFUQ | $[\text{Eu}_2(\text{tpt})_2(\text{PhCO}_2)_6(\text{H}_2\text{O})_2] \cdot \text{MeOH} \cdot 7\text{H}_2\text{O}$                                                                             | A | N. Goel, <i>J. Coord. Chem.</i> , 2015, <b>68</b> , 529, DOI: <a href="https://doi.org/10.1080/00958972.2014.992339">10.1080/00958972.2014.992339</a>                                                 | Eu(III)            |
| 246 | UJIGAX | $[\text{Eu}(\text{tpt})(\text{SCN})_3(\text{MeOH})_2(\text{H}_2\text{O})] \cdot \text{MeOH}$                                                                                                 | A |                                                                                                                                                                                                       | Eu(III)            |
| 247 | UJIGEV | $[\text{Tb}(\text{tpt})(\text{PhCO}_2)_3]_2[\text{Tb}(\text{tpt})(\text{PhCO}_2)_3(\text{MeOH})]_2 \cdot 2\text{MeOH} \cdot 4\text{H}_2\text{O}$                                             | A |                                                                                                                                                                                                       | Tb(III)            |
| 248 | UJIGIF | $[\text{Gd}(\text{tpt})(\text{SCN})_3(\text{MeOH})_2(\text{H}_2\text{O})] \cdot \text{MeOH}$                                                                                                 | A |                                                                                                                                                                                                       | Gd(III)            |
| 249 | UJIGOL | $[\text{Gd}_2(\text{tpt})_2(\text{PhCO}_2)_6(\text{H}_2\text{O})_2] \cdot 2\text{H}_2\text{O}$                                                                                               | A |                                                                                                                                                                                                       | Gd(III)            |
| 250 | UJIGUR | $[\text{Tb}(\text{tpt})(\text{SCN})_3(\text{H}_2\text{O})_3]$                                                                                                                                | A |                                                                                                                                                                                                       | Tb(III)            |
| 251 | UNIYOG | $[\text{Ni}(\text{tpt})(\text{pla})(\text{H}_2\text{O})_2] \cdot 3\text{H}_2\text{O}$                                                                                                        | A | Ch.-H. Jin, <i>Acta Cryst. E</i> , 2011, <b>67</b> , m393, DOI: <a href="https://doi.org/10.1107/S1600536811006842">10.1107/S1600536811006842</a>                                                     | Ni(II)             |
| 252 | VARROV | $[\text{Rh}(\text{tpt})(\text{Cl})_3] \cdot 2\text{H}_2\text{O}$                                                                                                                             | A | P. Paul, B. Tyagi, A.K. Bilakhiya, M.M. Bhadbhade, E. Suresh, G. Ramachandraiah, <i>Inorg. Chem.</i> , 1998, <b>37</b> , 5733, DOI: <a href="https://doi.org/10.1021/ic9709739">10.1021/ic9709739</a> | Rh(III)            |

|     |        |                                                                                                                            |   |                                                                                                                                                                                                                                                                                                      |                                                                                                                                                                                                            |         |
|-----|--------|----------------------------------------------------------------------------------------------------------------------------|---|------------------------------------------------------------------------------------------------------------------------------------------------------------------------------------------------------------------------------------------------------------------------------------------------------|------------------------------------------------------------------------------------------------------------------------------------------------------------------------------------------------------------|---------|
| 253 | VEVLEO | [Co(Htpt)(Cl) <sub>3</sub> ].H <sub>2</sub> O                                                                              | A | J.D. Holbrey, K.B. Vigour, W.M. Reichert, R.D. Rogers, <i>J. Chem. Crystallogr.</i> , 2006, <b>36</b> , 799, DOI: <a href="https://doi.org/10.1007/s10870-006-9157-6">10.1007/s10870-006-9157-6</a>                                                                                                  | Co(II)                                                                                                                                                                                                     |         |
| 254 | VIMZUO | {[Fe(tpt)W(CN) <sub>8</sub> ].2MeOH} <sub>n</sub>                                                                          | A | H. Zhao, A.J. Brown, A.V. Prosvirin, K.R. Dunbar, <i>Polyhedron</i> , 2013, <b>64</b> , 321, DOI: <a href="https://doi.org/10.1016/j.poly.2013.06.006">10.1016/j.poly.2013.06.006</a>                                                                                                                | Fe(III),<br>W(V)                                                                                                                                                                                           |         |
| 255 | VINBAX | {(H <sub>3</sub> O)[Cu(tpt)Mo(CN) <sub>8</sub> ].MeOH} <sub>n</sub>                                                        | A |                                                                                                                                                                                                                                                                                                      | Cu(II),<br>Mo(V)                                                                                                                                                                                           |         |
| 256 | VINBEB | {[Co <sub>3</sub> (tpt) <sub>2</sub> W(CN) <sub>16</sub> (H <sub>2</sub> O) <sub>6</sub> ].2H <sub>2</sub> O} <sub>n</sub> | A |                                                                                                                                                                                                                                                                                                      | Co(II),<br>W(V)                                                                                                                                                                                            |         |
| 257 | VINFAB | [Cu(tpt)(CF <sub>3</sub> SO <sub>3</sub> ) <sub>2</sub> (MeOH)].MeOH                                                       | A |                                                                                                                                                                                                                                                                                                      | Cu(II)                                                                                                                                                                                                     |         |
| 258 | VIYTAZ | [Ni(tpt)(Hsal <sup>NO<sub>2</sub></sup> -Glc)]ClO <sub>4</sub> .0.38MeCN.0.75H <sub>2</sub> O                              | A |                                                                                                                                                                                                                                                                                                      | A. Burkhardt, H. Gorls, W. Plass, <i>Carbohydr. Res.</i> , 2008, <b>343</b> , 1266, DOI: <a href="https://doi.org/10.1016/j.carres.2008.01.039">10.1016/j.carres.2008.01.039</a>                           | Ni(II)  |
| 259 | VIYTED | [Ni(tpt)(Hsal <sup>H</sup> -Man)]ClO <sub>4</sub> .1.88MeOH.1.19H <sub>2</sub> O                                           | A | Ni(II)                                                                                                                                                                                                                                                                                               |                                                                                                                                                                                                            |         |
| 260 | VOGZUP | [Pr(tpt)(NO <sub>3</sub> ) <sub>3</sub> (MeCN)]                                                                            | A | Z. Yue, H. Lu, Z. Li, Sh. Guo, J. Song, Y. Ren, Y.-Y. Huang, J. Lin, J.-Q. Wang, <i>CrystEngComm</i> , 2019, <b>21</b> , 5059, DOI: <a href="https://doi.org/10.1039/C9CE00867E">10.1039/C9CE00867E</a>                                                                                              | Pr(III)                                                                                                                                                                                                    |         |
| 261 | VOHBAY | [Nd(tpt)(NO <sub>3</sub> ) <sub>3</sub> (MeCN)]                                                                            | A |                                                                                                                                                                                                                                                                                                      | Nd(III)                                                                                                                                                                                                    |         |
| 262 | VOHBEC | [Pr(tpt)(NO <sub>3</sub> ) <sub>3</sub> (H <sub>2</sub> O)].MeCN                                                           | A |                                                                                                                                                                                                                                                                                                      | Pr(III)                                                                                                                                                                                                    |         |
| 263 | VOHBIG | [Nd(tpt)(NO <sub>3</sub> ) <sub>3</sub> (H <sub>2</sub> O)].MeCN                                                           | A |                                                                                                                                                                                                                                                                                                      | Nd(III)                                                                                                                                                                                                    |         |
| 264 | VOHBOM | [Sm(tpt)(NO <sub>3</sub> ) <sub>3</sub> (H <sub>2</sub> O)].MeCN                                                           | A |                                                                                                                                                                                                                                                                                                      | Sm(III)                                                                                                                                                                                                    |         |
| 265 | VOHBUS | [Eu(tpt)(NO <sub>3</sub> ) <sub>3</sub> (H <sub>2</sub> O)].MeCN                                                           | A |                                                                                                                                                                                                                                                                                                      | Eu(III)                                                                                                                                                                                                    |         |
| 266 | VOHCAZ | [Gd(tpt)(NO <sub>3</sub> ) <sub>3</sub> (H <sub>2</sub> O)].MeCN                                                           | A |                                                                                                                                                                                                                                                                                                      | Gd(III)                                                                                                                                                                                                    |         |
| 267 | VOHCED | [Tb(tpt)(NO <sub>3</sub> ) <sub>3</sub> (H <sub>2</sub> O)].MeCN                                                           | A |                                                                                                                                                                                                                                                                                                      | Tb(III)                                                                                                                                                                                                    |         |
| 268 | VOHCIH | [Dy(tpt)(NO <sub>3</sub> ) <sub>3</sub> (H <sub>2</sub> O)].MeCN                                                           | A |                                                                                                                                                                                                                                                                                                      | Dy(III)                                                                                                                                                                                                    |         |
| 269 | VOHCON | [Ho(tpt)(NO <sub>3</sub> ) <sub>3</sub> (H <sub>2</sub> O)].MeCN                                                           | A |                                                                                                                                                                                                                                                                                                      | Ho(III)                                                                                                                                                                                                    |         |
| 270 | VOHCUT | [Er(tpt)(NO <sub>3</sub> ) <sub>3</sub> (H <sub>2</sub> O)].MeCN                                                           | A |                                                                                                                                                                                                                                                                                                      | Er(III)                                                                                                                                                                                                    |         |
| 271 | VOHDAA | [Tm(tpt)(NO <sub>3</sub> ) <sub>3</sub> (H <sub>2</sub> O)].2MeCN                                                          | A |                                                                                                                                                                                                                                                                                                      | Tm(III)                                                                                                                                                                                                    |         |
| 272 | VOHDEE | [Yb(tpt)(NO <sub>3</sub> ) <sub>3</sub> (H <sub>2</sub> O)].2MeCN                                                          | A |                                                                                                                                                                                                                                                                                                      | Yb(III)                                                                                                                                                                                                    |         |
| 273 | VOHDII | [Lu(tpt)(NO <sub>3</sub> ) <sub>3</sub> (H <sub>2</sub> O)].2MeCN                                                          | A |                                                                                                                                                                                                                                                                                                      | Lu(III)                                                                                                                                                                                                    |         |
| 274 | VOHDOO | [UO <sub>2</sub> (tpt)(NO <sub>3</sub> ) <sub>2</sub> ]                                                                    | A |                                                                                                                                                                                                                                                                                                      | U(VI)                                                                                                                                                                                                      |         |
| 275 | VUGHIP | [Ru(tpt)(PPh <sub>3</sub> )(val)]BF <sub>4</sub>                                                                           | A |                                                                                                                                                                                                                                                                                                      | P. Kumar, A.K. Singh, J.K. Saxena, D.S. Pandey, <i>J. Organomet. Chem.</i> , 2009, <b>694</b> , 3570, DOI: <a href="https://doi.org/10.1016/j.jorganchem.2009.07.014">10.1016/j.jorganchem.2009.07.014</a> | Ru(II)  |
| 276 | VUGLUH | [Sm(tpt)(dbm) <sub>3</sub> ].MeCN                                                                                          | A |                                                                                                                                                                                                                                                                                                      | N. Hasan, K. Iftikhar, <i>J. Lumin.</i> , 2020, <b>223</b> , 117135, DOI: <a href="https://doi.org/10.1016/j.jlumin.2020.117135">10.1016/j.jlumin.2020.117135</a>                                          | Sm(III) |
| 277 | VULPUP | [Eu <sub>2</sub> (tpt) <sub>2</sub> (Brba) <sub>6</sub> ]                                                                  | A | C. Wang, J. Kang, X. Zhang, Y. Zhao, H. Chu, <i>J. Lumin.</i> , 2019, <b>215</b> , 116638, DOI: <a href="https://doi.org/10.1016/j.jlumin.2019.116638">10.1016/j.jlumin.2019.116638</a>                                                                                                              | Eu(III)                                                                                                                                                                                                    |         |
| 278 | WAZDOT | [Cu(tpt)(PPh <sub>3</sub> ) <sub>2</sub> ]PF <sub>6</sub> .2.5HCl <sub>3</sub>                                             | B | A. Báez-Castro, J. Baldenebro-López, A. Cruz-Enríquez, H. Höpfl, D. Glossman-Mitnik, V. Miranda-Soto, M. Parra-Hake, E. Reynoso-Soto, J.J. Campos-Gaxiola, <i>Inorg. Chim. Acta</i> , 2017, <b>466</b> , 486, DOI: <a href="https://doi.org/10.1016/j.ica.2017.07.007">10.1016/j.ica.2017.07.007</a> | Cu(I)                                                                                                                                                                                                      |         |
| 279 | WEHTOT | [Zn(tpt)(S <sub>2</sub> O <sub>3</sub> )(H <sub>2</sub> O)].0.5H <sub>2</sub> O                                            | A | M.E.D. de Vivar, S.Baggio, R.Baggio, <i>Acta Cryst. C</i> , 2006, <b>62</b> , m192, DOI: <a href="https://doi.org/10.1107/S0108270106010560">10.1107/S0108270106010560</a>                                                                                                                           | Zn(II)                                                                                                                                                                                                     |         |
| 280 | WEHTUZ | [Cd <sub>2</sub> (tpt) <sub>2</sub> (SO <sub>3</sub> ) <sub>2</sub> ].8H <sub>2</sub> O                                    | A | M.E.D. de Vivar, S. Baggio, M.T. Garland, R. Baggio, <i>Acta Cryst. C</i> , 2006, <b>62</b> , m195, DOI: <a href="https://doi.org/10.1107/S0108270106012078">10.1107/S0108270106012078</a>                                                                                                           | Cd(II)                                                                                                                                                                                                     |         |

|     |                        |                                                                                                                                                                    |   |                                                                                                                                                                                                                                                                                                                                                                                                                 |         |
|-----|------------------------|--------------------------------------------------------------------------------------------------------------------------------------------------------------------|---|-----------------------------------------------------------------------------------------------------------------------------------------------------------------------------------------------------------------------------------------------------------------------------------------------------------------------------------------------------------------------------------------------------------------|---------|
| 281 | WEPLOT                 | [Co(tpt)(ox)(H <sub>2</sub> O)]·4H <sub>2</sub> O                                                                                                                  | A | D.-Y. Cheng, W. Xu, Y.-Q. Zheng, <i>Acta Cryst. E</i> , 2006, <b>62</b> , m2561, DOI: <a href="https://doi.org/10.1107/S1600536806036361">10.1107/S1600536806036361</a>                                                                                                                                                                                                                                         | Co(II)  |
| 282 | WIBBUG                 | [Eu(tpt)(PhCO <sub>2</sub> ) <sub>3</sub> (H <sub>2</sub> O)] <sub>2</sub> ·EtOH·1.25H <sub>2</sub> O                                                              | A | Y.-F. Zhao, H.-B. Chu, F. Bai, D.-Q. Gao, H.-X. Zhang, Y.-Sh. Zhou, X.-Y. Wei, M.-N. Shan, H.-Y. Li, Y.-L. Zhao, <i>J. Organomet. Chem.</i> , 2012, <b>716</b> , 167, DOI: <a href="https://doi.org/10.1016/j.jorganchem.2012.06.031">10.1016/j.jorganchem.2012.06.031</a>                                                                                                                                      | Eu(III) |
| 283 | WIGLEE                 | [Ni(tpt)(MeOpdt) <sub>2</sub> ]·MeOH                                                                                                                               | A | M.C. Aragoni, M. Arca, F.A. Devillanova, M.B. Hursthouse, S.L. Huth, F. Isaia, V. Lippolis, A. Mancini, S. Soddu, G. Verani, <i>Dalton Trans.</i> , 2007, 2127, DOI: <a href="https://doi.org/10.1039/b701458a">10.1039/b701458a</a>                                                                                                                                                                            | Ni(II)  |
| 284 | WIGLII                 | [Ni(tpt) <sub>2</sub> ](MeOpdt) <sub>2</sub> ·4H <sub>2</sub> O                                                                                                    | A |                                                                                                                                                                                                                                                                                                                                                                                                                 | Ni(II)  |
| 285 | WIGLOO                 | [Ni(tpt) <sub>2</sub> ](I <sub>3</sub> ) <sub>2</sub>                                                                                                              | A |                                                                                                                                                                                                                                                                                                                                                                                                                 | Ni(II)  |
| 286 | WIGLUU                 | [Ni <sub>2</sub> (tpt) <sub>2</sub> (Br) <sub>4</sub> ]                                                                                                            | A |                                                                                                                                                                                                                                                                                                                                                                                                                 | Ni(II)  |
| 287 | WOQFOA                 | [Co(tpt)(Cl) <sub>2</sub> ] <sub>2</sub> ·2H <sub>2</sub> O                                                                                                        | A | Z. Azarkamanzad, F. Farzaneh, M. Maghami, J. Simpson, <i>New J. Chem.</i> , 2019, <b>43</b> , 12020, DOI: <a href="https://doi.org/10.1039/C9NJ02055A">10.1039/C9NJ02055A</a>                                                                                                                                                                                                                                   | Co(II)  |
| 288 | WOSDOA                 | [Mn(tpt)(Cl) <sub>2</sub> (EtOH)]·(NH <sub>2</sub> ) <sub>2</sub> S                                                                                                | A | A.A. Hassoon, R.G. Harrison, N. Nawar, S.J. Smith, M.M. Mostafa, <i>J. Mol. Struct.</i> , 2020, <b>1203</b> , 127240, DOI: <a href="https://doi.org/10.1016/j.molstruc.2019.127240">10.1016/j.molstruc.2019.127240</a>                                                                                                                                                                                          | Mn(II)  |
| 289 | WOSDUG                 | [Mn(tpt)(MeCO <sub>2</sub> )(Cl)(H <sub>2</sub> O)]·0.4H <sub>2</sub> O                                                                                            | A |                                                                                                                                                                                                                                                                                                                                                                                                                 | Mn(II)  |
| 290 | XABNUL<br>XUBNUL<br>01 | [Mn(tpt)(Cl) <sub>2</sub> (H <sub>2</sub> O)]·H <sub>2</sub> O                                                                                                     | A | M.M. Najafpour, M. Amini, M. Bagherzadeh, D.M. Boghaei, V. McKee, <i>Trans. Met. Chem.</i> , 2010, <b>35</b> , 297, DOI: <a href="https://doi.org/10.1007/s11243-010-9327-4">10.1007/s11243-010-9327-4</a><br>W.H. Al-Assy, A. Moneum H. El-Askalany, M.M. Mostafa, <i>Spectrochim. Acta A</i> , 2013, <b>116</b> , 401, DOI: <a href="https://doi.org/10.1016/j.saa.2013.07.086">10.1016/j.saa.2013.07.086</a> | Mn(II)  |
| 291 | XAHMID                 | [Ir(H) <sub>2</sub> (tpt)(PPh <sub>3</sub> ) <sub>2</sub> ]PF <sub>6</sub>                                                                                         | B | M. Maekawa, T. Minematsu, H. Konaka, K. Sugimoto, T. Kuroda-Sowa, Y. Suenaga, M. Munakata, <i>Inorg. Chim. Acta</i> , 2004, <b>357</b> , 3456, DOI: <a href="https://doi.org/10.1016/j.ica.2004.03.052">10.1016/j.ica.2004.03.052</a>                                                                                                                                                                           | Ir(III) |
| 292 | XAHMOJ                 | [Ir <sub>2</sub> (H) <sub>4</sub> (tpt)(PPh <sub>3</sub> ) <sub>4</sub> ](PF <sub>6</sub> ) <sub>2</sub> ·2H <sub>2</sub> O                                        | F |                                                                                                                                                                                                                                                                                                                                                                                                                 | Ir(III) |
| 293 | XAZKUF                 | [Mn <sub>2</sub> (tpt) <sub>2</sub> (SO <sub>4</sub> ) <sub>2</sub> (H <sub>2</sub> O) <sub>2</sub> ]·4H <sub>2</sub> O                                            | A | M.E.D.de Vivar, S. Baggio, M.T. Garland, R. Baggio, <i>Acta Cryst. E</i> , 2006, <b>62</b> , m141, DOI: <a href="https://doi.org/10.1107/S1600536805041528">10.1107/S1600536805041528</a>                                                                                                                                                                                                                       | Mn(II)  |
| 294 | XEPELEL                | [Co(tpt)(dca) <sub>2</sub> (H <sub>2</sub> O)] <sub>n</sub>                                                                                                        | A | J. Luo, L. Qiu, B. Liu, X. Zhang, F. Yang, L. Cui, <i>Chin. J. Chem.</i> , 2012, <b>30</b> , 522, DOI: <a href="https://doi.org/10.1002/cjoc.201100553">10.1002/cjoc.201100553</a>                                                                                                                                                                                                                              | Co(II)  |
| 295 | XESTAR                 | [Co(tpt)(H <sub>2</sub> btca)(H <sub>2</sub> O) <sub>2</sub> ] <sub>n</sub>                                                                                        | A | A. Majumder, V. Gramlich, G.M. Rosair, S.R. Batten, J.D. Masuda, M.S.El Fallah, J. Ribas, J.-P. Sutter, C. Desplanches, S. Mitra, <i>Cryst. Growth Des.</i> , 2006, <b>6</b> , 2355, DOI: <a href="https://doi.org/10.1021/cg060337y">10.1021/cg060337y</a>                                                                                                                                                     | Co(II)  |
| 296 | XIBYOX                 | [Zn(tpt)(ox)(H <sub>2</sub> O)]·4H <sub>2</sub> O                                                                                                                  | A | H.-Zh. Xie, W.-J. Pan, <i>Acta Cryst. E</i> , 2007, <b>63</b> , m1231, DOI: <a href="https://doi.org/10.1107/S1600536807013517">10.1107/S1600536807013517</a>                                                                                                                                                                                                                                                   | Zn      |
| 297 | XIGDUO                 | [U(tpt) <sub>2</sub> (CF <sub>3</sub> SO <sub>3</sub> ) <sub>3</sub> (H <sub>2</sub> O)]·2.5Py                                                                     | A | J. C. Berthet, P. Thuery, M. Ephritikhine, <i>CSD Communication</i> , 2013.                                                                                                                                                                                                                                                                                                                                     | U(III)  |
| 298 | XIGFAW                 | [Sm(tpt) <sub>2</sub> (CF <sub>3</sub> SO <sub>3</sub> ) <sub>2</sub> (H <sub>2</sub> O)]CF <sub>3</sub> SO <sub>3</sub> ·CF <sub>3</sub> SO <sub>3</sub> H·0.5tpt | A |                                                                                                                                                                                                                                                                                                                                                                                                                 | Sm(III) |
| 299 | XIGFEA                 | [Ce(tpt) <sub>2</sub> (CF <sub>3</sub> SO <sub>3</sub> ) <sub>3</sub> ]·2tpt                                                                                       | A |                                                                                                                                                                                                                                                                                                                                                                                                                 | Ce(III) |
| 300 | XIHSIR                 | [Mn(tpt)(NO <sub>3</sub> )(Cl)(H <sub>2</sub> O)]·0.5H <sub>2</sub> O                                                                                              | A | A. Das, G. Pilet, S. Mitra, <i>Indian J. Chem. A</i> , 2006, <b>45</b> , 1988                                                                                                                                                                                                                                                                                                                                   | Mn(II)  |

|     |                        |                                                                                                                                                     |   |                                                                                                                                                                                                                                                                                                                                                                     |                  |
|-----|------------------------|-----------------------------------------------------------------------------------------------------------------------------------------------------|---|---------------------------------------------------------------------------------------------------------------------------------------------------------------------------------------------------------------------------------------------------------------------------------------------------------------------------------------------------------------------|------------------|
| 301 | XIHSOX                 | [Mn(tpt)(SCN) <sub>2</sub> (H <sub>2</sub> O)]                                                                                                      | A |                                                                                                                                                                                                                                                                                                                                                                     | Mn(II)           |
| 302 | XORKUN                 | [Co(tpt)(Cl) <sub>2</sub> (H <sub>2</sub> O)]·H <sub>2</sub> O                                                                                      | A | A.L. Rheingold, <i>CSD Communication</i> , 2019.                                                                                                                                                                                                                                                                                                                    | Co(II)           |
| 303 | XOXRIO                 | {K(H <sub>2</sub> tpt)0.5[Cu <sub>2</sub> (tpt)(H <sub>8</sub> L)]·3.6H <sub>2</sub> O} <sub>n</sub>                                                | A | D. Quiñone, S. Martinez, F. Bozoglian, C. Bazzicalupi, J. Torres, N. Veiga, C. Kremer, A. Bianchi, <i>ChemPlusChem</i> , 2019, <b>84</b> , 540, DOI: <a href="https://doi.org/10.1002/cplu.201900141">10.1002/cplu.201900141</a>                                                                                                                                    | Cu(II), K(I)     |
| 304 | XOZDIB                 | [Tb(tpt)(NO <sub>3</sub> ) <sub>3</sub> (H <sub>2</sub> O)]·MeOH·EtOH                                                                               | A | Zh. Dan, <i>CSD Communication</i> , 2014.                                                                                                                                                                                                                                                                                                                           | Tb(III)          |
| 305 | XUDZIG                 | [Ru(tpt)(tbbpy) <sub>2</sub> ](PF <sub>6</sub> ) <sub>2</sub> ·0.5EtOH·0.5Et <sub>2</sub> O                                                         | B | M. Schwalbe, M. Karnahl, H. Gorls, D. Chartrand, F. Laverdiere, G.S. Hanan, S. Tschierlei, B. Dietzek, M. Schmitt, J. Popp, J.G. Vos, S. Rau, <i>Dalton Trans.</i> , 2009, 4012, DOI: <a href="https://doi.org/10.1039/b822550h">10.1039/b822550h</a>                                                                                                               | Ru(II)           |
| 306 | YEHYOB                 | {[Zn(tpt)(cppa)]·3H <sub>2</sub> O} <sub>n</sub>                                                                                                    | A | J.-Ch. Zhu, Sh.-J. Liu, <i>Z. Kristallogr. NCS</i> , 2012, <b>227</b> , 353, DOI: <a href="https://doi.org/10.1524/ncrs.2012.0168">10.1524/ncrs.2012.0168</a>                                                                                                                                                                                                       | Zn(II)           |
| 307 | YENSAM<br>YENSAM<br>01 | [Mn(tpt)(MeCO <sub>2</sub> )(dca)(H <sub>2</sub> O)]·2H <sub>2</sub> O                                                                              | A | A. Majumder, G. Pilet, M.T.G. Rodriguez, S. Mitra, <i>Polyhedron</i> , 2006, <b>25</b> , 2550, DOI: <a href="https://doi.org/10.1016/j.poly.2006.03.021">10.1016/j.poly.2006.03.021</a><br>M. Zhang, R. Fang, Q. Zhao, <i>J. Chem. Crystallogr.</i> , 2008, <b>38</b> , 601, DOI: <a href="https://doi.org/10.1007/s10870-008-9352-8">10.1007/s10870-008-9352-8</a> | Mn(II)           |
| 308 | YENSEQ                 | [Zn(tpt)(dca) <sub>2</sub> ]·2H <sub>2</sub> O                                                                                                      | A | A. Majumder, G. Pilet, M.T.G. Rodriguez, S. Mitra, <i>Polyhedron</i> , 2006, <b>25</b> , 2550, DOI: <a href="https://doi.org/10.1016/j.poly.2006.03.021">10.1016/j.poly.2006.03.021</a>                                                                                                                                                                             | Zn(II)           |
| 309 | YENSIU                 | [Cd <sub>2</sub> (tpt) <sub>2</sub> (dca) <sub>2</sub> ](ClO <sub>4</sub> ) <sub>2</sub>                                                            | A |                                                                                                                                                                                                                                                                                                                                                                     | Cd(II)           |
| 310 | YEQQAN                 | [Cu <sub>2</sub> (tpt)(I) <sub>2</sub> ] <sub>n</sub>                                                                                               | E | X.-P. Zhou, D. Li, Sh.-L. Zheng, X. Zhang, T. Wu, <i>Inorg. Chem.</i> , 2006, <b>45</b> , 7119, DOI: <a href="https://doi.org/10.1021/ic060564p">10.1021/ic060564p</a>                                                                                                                                                                                              | Cu(I)            |
| 311 | YEQQER                 | [Cu <sub>3</sub> (tpt)(I) <sub>3</sub> ] <sub>n</sub>                                                                                               | J |                                                                                                                                                                                                                                                                                                                                                                     | Cu(I)            |
| 312 | YEQQIV                 | [Cu <sub>4</sub> (tpt) <sub>2</sub> (I) <sub>4</sub> (Cl) <sub>2</sub> ] <sub>n</sub>                                                               | C |                                                                                                                                                                                                                                                                                                                                                                     | Cu(I), Cu(II)    |
| 313 | YEQRIY                 | [CrMn(tpt)(NO <sub>3</sub> )(CN) <sub>4</sub> (phen)(H <sub>2</sub> O)]·2H <sub>2</sub> O                                                           | A | M.-G. Alexandru, D. Visinescu, B. Braun-Cula, F. Lloret, M. Julve, <i>Eur. J. Inorg. Chem.</i> , 2018, 349, DOI: <a href="https://doi.org/10.1002/ejic.201700313">10.1002/ejic.201700313</a>                                                                                                                                                                        | Mn(II), Cr(III)  |
| 314 | YEQRUK                 | [CrMn(tpt)(NO <sub>3</sub> )(CN) <sub>4</sub> (ampy)(H <sub>2</sub> O)]·MeCN                                                                        | A |                                                                                                                                                                                                                                                                                                                                                                     | Mn(II), Cr(III)  |
| 315 | YIVYOT                 | [Sm <sub>2</sub> (tpt) <sub>2</sub> (Clba) <sub>4</sub> (NO <sub>3</sub> ) <sub>2</sub> (H <sub>2</sub> O) <sub>2</sub> ]                           | A | B. Yue, Y.-N. Chen, H.-B. Chu, Y.-R. Qu, A.-L. Wang, Y.-L. Zhao, <i>Inorg. Chim. Acta</i> , 2014, <b>414</b> , 39, DOI: <a href="https://doi.org/10.1016/j.ica.2014.01.024">10.1016/j.ica.2014.01.024</a>                                                                                                                                                           | Sm(III)          |
| 316 | YIVYUZ                 | [Tb <sub>2</sub> (tpt) <sub>2</sub> (Clba) <sub>3</sub> (NO <sub>3</sub> ) <sub>2</sub> (H <sub>2</sub> O) <sub>3</sub> Clba·EtOH·2H <sub>2</sub> O | A |                                                                                                                                                                                                                                                                                                                                                                     | Tb(III)          |
| 317 | YIVZAG                 | [Tb <sub>2</sub> (tpt) <sub>2</sub> (Brba) <sub>4</sub> (NO <sub>3</sub> ) <sub>2</sub> (H <sub>2</sub> O) <sub>2</sub> ]                           | A |                                                                                                                                                                                                                                                                                                                                                                     | Tb(III)          |
| 318 | YODSUH                 | {[Co <sub>2</sub> (tpt)(Cl) <sub>4</sub> (H <sub>2</sub> O)]·0.25H <sub>2</sub> O} <sub>n</sub>                                                     | D | M. Maghami, F. Farzaneh, J. Simpson, A. Moazeni, <i>Polyhedron</i> , 2014, <b>73</b> , 22, DOI: <a href="https://doi.org/10.1016/j.poly.2014.02.012">10.1016/j.poly.2014.02.012</a>                                                                                                                                                                                 | Co(II)           |
| 319 | ZENCEA                 | [Li(tpt)(EtOH) <sub>2</sub> ]BPh <sub>4</sub>                                                                                                       | A | H. Schödel, T.T.H. Van, H. Bock, <i>Acta Cryst. C</i> , 1995, <b>51</b> , 2001, DOI: <a href="https://doi.org/10.1107/S0108270195004641">10.1107/S0108270195004641</a>                                                                                                                                                                                              | Li(I)            |
| 320 | ZETFEM                 | [TbGd(tpt) <sub>2</sub> (poa) <sub>6</sub> ]·2MeOH                                                                                                  | A | Zh.-X. Wang, A.-L. Wang, X.-Y. Wei, Y.-R. Qu, B. Yue, J. Kang, H.-B. Chu, Y.-L. Zhao, <i>Luminescence</i> , 2015, <b>30</b> , 835, DOI: <a href="https://doi.org/10.1002/bio.2829">10.1002/bio.2829</a>                                                                                                                                                             | Tb(III), Gd(III) |
| 321 | ZIXLUP                 | [U <sub>2</sub> O(tpt) <sub>2</sub> (MeCN) <sub>2</sub> (I) <sub>2</sub> (Cp*) <sub>2</sub> ](I) <sub>2</sub> ·4MeCN                                | A | J. Maynadie, J. C. Berthet, P. Thuery, M. Ephritikhine, <i>CSD Communication</i> , 2013                                                                                                                                                                                                                                                                             | U(III)           |
| 322 | ZOLXUW                 | [Nd(tpt)(tta) <sub>3</sub> ]·EtOH                                                                                                                   | A | Q. Liu, P. Cai, X. Wan, Sh. Zhang, K.                                                                                                                                                                                                                                                                                                                               | Nd(III)          |

|     |        |                                                            |   |                                                                                                                                                                                                                   |         |
|-----|--------|------------------------------------------------------------|---|-------------------------------------------------------------------------------------------------------------------------------------------------------------------------------------------------------------------|---------|
| 323 | ZOLYAD | [Nd(tpt)(btfa) <sub>3</sub> ].EtOH                         | A | Du, Q. Yin, <i>J. Mol. Struct.</i> , 2019, <b>1193</b> , 151,<br>DOI: <a href="https://doi.org/10.1016/j.molstruc.2019.05.008">10.1016/j.molstruc.2019.05.008</a>                                                 | Nd(III) |
| 324 | ZUGQAV | [Co(tpt)(Cl) <sub>2</sub> (MeOH)].MeOH.0.5H <sub>2</sub> O | A | M. Maghami, F. Farzaneh, J. Simpson, M. Ghiasi, M. Azarkish, <i>J. Mol. Struct.</i> , 2015, <b>1093</b> , 24,<br>DOI: <a href="https://doi.org/10.1016/j.molstruc.2015.03.037">10.1016/j.molstruc.2015.03.037</a> | Co(II)  |

dtc = diethyldithiocarbamate; Medpt = N,N-bis(3-aminopropyl)methylamine; H<sub>2</sub>salaglc = benzyl-2-deoxy-2-salicylideneamino- $\alpha$ -D-glucopyranoside; ROpdt = (RO)(4-MeOC<sub>6</sub>H<sub>4</sub>)PS<sub>2</sub><sup>-</sup> R = Et, Pr, *i*-Pr, Bu; H<sub>2</sub>adc = anthracene-9,10-dicarboxylic acid; Hpca = pyridine-2-carboxylic acid; 2-pa = bis(2-pyridylcarbonyl)amido; dppm = bis(diphenylphosphino)methane; dppe = bis(diphenylphosphino)ethane; dppp = bis(diphenylphosphino)propane; dppb = bis(diphenylphosphino)butane; pa = phenylalanine; cym = *p*-cymene; Cp\* = pentamethylcyclopentadiene; dmbpy = 4,4'-dimethyl-2,2'-bipyridine; Hfa = formic acid; H<sub>5</sub>saltag<sup>Br</sup> = 1,2,3-tris[(5-bromosalicylidene)amino]guanidine); dbm = dibenzoylmethane; H<sub>2</sub>tda = thiodiacetic acid; pca = bis(2-pyridylcarbonyl)amide; H<sub>2</sub>pa = pamoic acid; tta = 2-thienoyltrifluoroacetone; ba = 1-benzoylacetone; Hbtfa = 4,4,4-trifluoro-1-phenyl-1,3-butanedione; Htta = 4,4,4-trifluoro-1-(2-thienyl)-1,3-butanedione; dca = dicyanamide; pop = bis(2-(diphenylphosphino)phenyl)ether; hmde = N-(hydroxyethyl)-N-methyldithiocarbamate; diox = 1,4-dioxane; tdf = 1,1,1,2,2,3,3,7,7,8,8,9,9,9-tetradecafluorononane-4,6-ditionate; hfac = 1,1,1,5,5,5-hexafluoropentane-2,4-dionate; H<sub>2</sub>pdc = pyridine-2,4-dicarboxylic acid; H<sub>2</sub>fum = fumaric acid; H<sub>2</sub>ta = terephthalic acid; ee = 1-ethoxyethylamino; ta = *p*-toluidine; H<sub>3</sub>btb = 1,3,5-tris(4-carboxyphenyl)benzene; 4,4'-bpy = 4,4'-bipyridine; Hsal = salicylic acid; Hpoa = phenoxylacetic acid; tpip = tetraphenylimidodiphosphinate; Hnda = 1,4-naphthalene dicarboxylic acid; Tp\* = tris(3,5-dimethylpyrazol-1-yl)borohydride; H<sub>2</sub>bpdc = 4,4'-biphenyldicarboxylic acid; dma = N,N-dimethylacetamide; H<sub>2</sub>pla = pimelic acid; H<sub>2</sub>sal<sup>NO<sub>2</sub></sup>-Glc = 2-deoxy-2-(5-nitrosalicylideneamino)- $\alpha$ -D-glucopyranoside; H<sub>2</sub>sal<sup>H</sup>-Man = 2-deoxy-2-salicylideneamino- $\alpha$ -D-mannopyranoside; Hval = valine; HBrba = 4-bromobenzoic acid; HClba = 4-chlorobenzoic acid; H<sub>2</sub>ox = oxalic acid; MeOpdt = O-methyl-(4-methoxyphenyl)phosphonoditioate; H<sub>4</sub>btca = 1,2,4,5-benzenetetracarboxylic acid; H<sub>12</sub>L = phytate; tbbpy = 4,4'-di-tert-butyl-2,2'-bipyridine); H<sub>2</sub>cppa = 3-(4-carboxyphenyl)-propionic acid; phen = 1,10-phenanthroline; ampy = 2-aminomethylpyridine

**Table S2.** Fragments observed in positive/negative ion mode ESI mass spectrometry of **2–7**.

| Ion                                                                                                                                                                                | Molecular formula                                                                               | Calculated <sup>1</sup><br><i>m/z</i> | Observed<br><i>m/z</i> | Relative<br>abundance |
|------------------------------------------------------------------------------------------------------------------------------------------------------------------------------------|-------------------------------------------------------------------------------------------------|---------------------------------------|------------------------|-----------------------|
| <b>2, ESI+</b>                                                                                                                                                                     |                                                                                                 |                                       |                        |                       |
| {tpt+H} <sup>+</sup>                                                                                                                                                               | C <sub>18</sub> H <sub>13</sub> N <sub>6</sub> <sup>+1</sup>                                    | 313.11962                             | 313.11890              | 17                    |
| [Fe <sup>III</sup> (tpt)(MeO) <sub>2</sub> ] <sup>+</sup>                                                                                                                          | C <sub>20</sub> H <sub>18</sub> FeN <sub>6</sub> O <sub>2</sub> <sup>+1</sup>                   | 430.08406                             | 430.08249              | 75                    |
| <b>[Fe<sup>III</sup>(tpt)(Cl)(MeO)]<sup>+</sup></b>                                                                                                                                | <b>C<sub>19</sub>H<sub>15</sub>ClFeN<sub>6</sub>O<sup>+1</sup></b>                              | <b>434.03397</b>                      | <b>434.03281</b>       | <b>100</b>            |
| {[Fe <sup>III</sup> (piv)(Cl) <sub>2</sub> (acetone)(MeOH) <sub>6</sub> ]+Na} <sup>+</sup>                                                                                         | C <sub>14</sub> H <sub>39</sub> Cl <sub>2</sub> FeNaO <sub>9</sub> <sup>+1</sup>                | 500.12182                             | 500.12396              | 26                    |
| <b>3, ESI+</b>                                                                                                                                                                     |                                                                                                 |                                       |                        |                       |
| {tpt+H} <sup>+</sup>                                                                                                                                                               | C <sub>18</sub> H <sub>13</sub> N <sub>6</sub> <sup>+1</sup>                                    | 313.11962                             | 313.11914              | 43                    |
| <b>{tpt+Na}<sup>+</sup></b>                                                                                                                                                        | <b>C<sub>18</sub>H<sub>12</sub>N<sub>6</sub>Na<sup>+1</sup></b>                                 | <b>335.10157</b>                      | <b>335.10098</b>       | <b>100</b>            |
| [Fe <sup>III</sup> (tpt)(MeO) <sub>2</sub> ] <sup>+</sup>                                                                                                                          | C <sub>20</sub> H <sub>18</sub> FeN <sub>6</sub> O <sub>2</sub> <sup>+1</sup>                   | 430.08406                             | 430.08298              | 75                    |
| [Fe <sup>III</sup> (tpt)(Cl)(MeO)] <sup>+</sup>                                                                                                                                    | C <sub>19</sub> H <sub>15</sub> ClFeN <sub>6</sub> O <sup>+1</sup>                              | 434.03397                             | 434.03299              | 71                    |
| [Fe <sup>III</sup> <sub>2</sub> O(tpt) <sub>2</sub> (Cl) <sub>3</sub> ] <sup>+</sup>                                                                                               | C <sub>39</sub> H <sub>24</sub> Cl <sub>3</sub> Fe <sub>2</sub> N <sub>12</sub> O <sup>+1</sup> | 856.99549                             | 856.99463              | 2                     |
| <b>3a, ESI+</b>                                                                                                                                                                    |                                                                                                 |                                       |                        |                       |
| {tpt+H} <sup>+</sup>                                                                                                                                                               | C <sub>18</sub> H <sub>13</sub> N <sub>6</sub> <sup>+1</sup>                                    | 313.11962                             | 313.11896              | 21                    |
| [Fe <sup>II</sup> (tpt) <sub>2</sub> ] <sup>2+</sup>                                                                                                                               | C <sub>36</sub> H <sub>24</sub> FeN <sub>12</sub> <sup>+2</sup>                                 | 340.07926                             | 340.07849              | 89                    |
| [Fe <sup>II</sup> (tpt)(MeCO <sub>2</sub> )(MeOH) <sub>2</sub> ] <sup>+</sup>                                                                                                      | C <sub>22</sub> H <sub>23</sub> FeN <sub>6</sub> O <sub>4</sub> <sup>+1</sup>                   | 491.11247                             | 491.35931              | 53                    |
| <b>[Fe<sup>II</sup>(tpt)(Cl)(thf)<sub>2</sub>(MeOH)<sub>2</sub>(H<sub>2</sub>O)<sub>2</sub>]<sup>+</sup></b>                                                                       | <b>C<sub>28</sub>H<sub>40</sub>ClFeN<sub>6</sub>O<sub>6</sub><sup>+1</sup></b>                  | <b>647.20417</b>                      | <b>647.21265</b>       | <b>100</b>            |
| <b>4a, ESI+</b>                                                                                                                                                                    |                                                                                                 |                                       |                        |                       |
| [Fe <sup>III</sup> <sub>3</sub> O(piv) <sub>6</sub> ] <sup>+</sup>                                                                                                                 | C <sub>30</sub> H <sub>54</sub> Fe <sub>3</sub> O <sub>13</sub> <sup>+1</sup>                   | 790.16070                             | 790.16245              | 40                    |
| [Fe <sup>III</sup> <sub>3</sub> O(piv) <sub>6</sub> (thf)] <sup>+</sup>                                                                                                            | C <sub>34</sub> H <sub>62</sub> Fe <sub>3</sub> O <sub>14</sub> <sup>+1</sup>                   | 862.21822                             | 862.21887              | 90                    |
| [Fe <sup>III</sup> <sub>3</sub> O(OH) <sub>2</sub> (piv) <sub>4</sub> (tpt)] <sup>+</sup>                                                                                          | C <sub>38</sub> H <sub>50</sub> Fe <sub>3</sub> N <sub>6</sub> O <sub>11</sub> <sup>+1</sup>    | 934.15857                             | 934.27383              | 50                    |
| [Fe <sup>III</sup> <sub>3</sub> O(piv) <sub>4</sub> (tpt-O)(MeO)(MeOH) <sub>2</sub> ] <sup>+</sup>                                                                                 | C <sub>41</sub> H <sub>59</sub> Fe <sub>3</sub> N <sub>6</sub> O <sub>13</sub> <sup>+1</sup>    | 1011.21827                            | 1011.22138             | 5                     |
| [Fe <sup>III</sup> <sub>6</sub> O <sub>4</sub> (piv) <sub>4</sub> (tpt-O)(MeO) <sub>4</sub> (MeOH) <sub>3</sub> (MeCN) <sub>3</sub> (H <sub>2</sub> O) <sub>6</sub> ] <sup>+</sup> | C <sub>51</sub> H <sub>93</sub> Fe <sub>6</sub> N <sub>9</sub> O <sub>26</sub> <sup>+1</sup>    | 1583.23224                            | 1583.23120             | 3                     |
| [Fe <sup>III</sup> <sub>7</sub> O <sub>4</sub> (piv) <sub>7</sub> (tpt-O)(MeO) <sub>4</sub> (MeOH)(MeCN) <sub>2</sub> (H <sub>2</sub> O)] <sup>+</sup>                             | C <sub>62</sub> H <sub>99</sub> Fe <sub>7</sub> N <sub>8</sub> O <sub>25</sub> <sup>+1</sup>    | 1747.22201                            | 1747.21614             | 34                    |
| [Fe <sup>III</sup> <sub>7</sub> O <sub>4</sub> (piv) <sub>8</sub> (tpt-O)(MeO) <sub>3</sub> (MeOH)(MeCN) <sub>3</sub> ] <sup>+</sup>                                               | C <sub>68</sub> H <sub>106</sub> Fe <sub>7</sub> N <sub>9</sub> O <sub>25</sub> <sup>+1</sup>   | 1840.27399                            | 1840.27698             | 10                    |
| <b>[Fe<sup>III</sup><sub>7</sub>O<sub>4</sub>(piv)<sub>9</sub>(tpt-O)(MeO)<sub>2</sub>(MeOH)(MeCN)<sub>3</sub>]<sup>+</sup></b>                                                    | <b>C<sub>72</sub>H<sub>112</sub>Fe<sub>7</sub>N<sub>9</sub>O<sub>26</sub><sup>+1</sup></b>      | <b>1910.31586</b>                     | <b>1910.31726</b>      | <b>100</b>            |
| {[Fe <sup>III</sup> <sub>7</sub> O <sub>5</sub> (piv) <sub>10</sub> (tpt-O)(MeOH)(MeCN)(H <sub>2</sub> O) <sub>9</sub> ]+H} <sup>+</sup>                                           | C <sub>71</sub> H <sub>128</sub> Fe <sub>7</sub> N <sub>7</sub> O <sub>36</sub> <sup>+1</sup>   | 2046.38405                            | 2046.31628             | 11                    |
| <b>4a, ESI-</b>                                                                                                                                                                    |                                                                                                 |                                       |                        |                       |
| <b>[Fe<sup>III</sup><sub>7</sub>O<sub>5</sub>(piv)<sub>11</sub>(MeO)]<sup>-</sup></b>                                                                                              | <b>C<sub>56</sub>H<sub>102</sub>Fe<sub>7</sub>O<sub>28</sub><sup>-1</sup></b>                   | <b>1614.20087</b>                     | <b>1614.18713</b>      | <b>100</b>            |



|                                                                                                                                                    |                                                                                       |                   |                   |            |
|----------------------------------------------------------------------------------------------------------------------------------------------------|---------------------------------------------------------------------------------------|-------------------|-------------------|------------|
| $[\text{Fe}^{\text{III}}_7\text{O}_4(\text{piv})_{12}(\text{MeO})_2]^-$                                                                            | $\text{C}_{62}\text{H}_{114}\text{Fe}_7\text{O}_{30}^{-1}$                            | 1730.28460        | 1730.26984        | 12         |
| $[\text{Fe}^{\text{III}}_7\text{O}_5(\text{piv})_9(\text{tpt-O})(\text{MeO})_3(\text{MeCN})_3]^-$                                                  | $\text{C}_{72}\text{H}_{112}\text{Fe}_7\text{N}_9\text{O}_{27}^{-1}$                  | 1926.31187        | 1926.29722        | 20         |
| <b>4b, <sup>2</sup>ESI+</b>                                                                                                                        |                                                                                       |                   |                   |            |
| $\{[\text{Fe}^{\text{III}}_7\text{O}_4(\text{piv})_4(\text{tpt-O})(\text{MeO})_8(\text{H}_2\text{O})_5] + \text{H}\}^+$                            | $\text{C}_{46}\text{H}_{83}\text{Fe}_7\text{N}_6\text{O}_{26}^{+1}$                   | 1527.07971        | 1527.20312        | 28         |
| <b><math>\{[\text{Fe}^{\text{III}}_7\text{O}_4(\text{piv})_5(\text{tpt-O})(\text{MeO})_7(\text{H}_2\text{O})_5] + \text{H}\}^+</math></b>          | <b><math>\text{C}_{50}\text{H}_{89}\text{Fe}_7\text{N}_6\text{O}_{27}^{+1}</math></b> | <b>1597.12157</b> | <b>1597.24479</b> | <b>100</b> |
| $\{[\text{Fe}^{\text{III}}_7\text{O}_4(\text{piv})_6(\text{tpt-O})(\text{MeO})_6(\text{H}_2\text{O})_5] + \text{H}\}^+$                            | $\text{C}_{54}\text{H}_{95}\text{Fe}_7\text{N}_6\text{O}_{28}^{+1}$                   | 1667.16344        | 1667.28601        | 48         |
|                                                                                                                                                    |                                                                                       |                   |                   |            |
| $[\text{Fe}^{\text{III}}_7\text{O}_4(\text{piv})_7(\text{tpt})(\text{MeO})_5]^+$                                                                   | $\text{C}_{58}\text{H}_{90}\text{Fe}_7\text{N}_6\text{O}_{23}^{+1}$                   | 1630.14974        | 1630.15123        | 3          |
| $[\text{Fe}^{\text{III}}_7\text{O}_4(\text{piv})_8(\text{tpt})(\text{MeO})_4]^+$                                                                   | $\text{C}_{62}\text{H}_{96}\text{Fe}_7\text{N}_6\text{O}_{24}^{+1}$                   | 1700.19160        | 1700.19223        | 9          |
| $[\text{Fe}^{\text{III}}_7\text{O}_4(\text{piv})_9(\text{tpt})(\text{MeO})_3]^+$                                                                   | $\text{C}_{66}\text{H}_{102}\text{Fe}_7\text{N}_6\text{O}_{25}^{+1}$                  | 1770.23347        | 1770.23466        | 55         |
| $[\text{Fe}^{\text{III}}_7\text{O}_4(\text{piv})_{10}(\text{tpt})(\text{MeO})_2]^+$                                                                | $\text{C}_{70}\text{H}_{108}\text{Fe}_7\text{N}_6\text{O}_{26}^{+1}$                  | 1840.27533        | 1840.27616        | 77         |
| $[\text{Fe}^{\text{III}}_7\text{O}_4(\text{piv})_{11}(\text{tpt})(\text{MeO})]^+$                                                                  | $\text{C}_{74}\text{H}_{114}\text{Fe}_7\text{N}_6\text{O}_{27}^{+1}$                  | 1910.31720        | 1910.31748        | 45         |
| <b>4b, ESI-</b>                                                                                                                                    |                                                                                       |                   |                   |            |
| $[\text{Fe}^{\text{III}}_2\text{O}(\text{piv})_3(\text{MeO})_2]^-$                                                                                 | $\text{C}_{21}\text{H}_{39}\text{Fe}_2\text{O}_{10}^{-1}$                             | 493.08288         | 493.08048         | 35         |
| <b><math>[\text{Fe}^{\text{III}}_2\text{O}(\text{piv})_4(\text{MeO})]^-</math></b>                                                                 | <b><math>\text{C}_{21}\text{H}_{39}\text{Fe}_2\text{O}_{10}^{-1}</math></b>           | <b>563.12474</b>  | <b>563.12226</b>  | <b>100</b> |
| $[\text{Fe}^{\text{III}}_2\text{O}(\text{piv})_5]^-$                                                                                               | $\text{C}_{25}\text{H}_{45}\text{Fe}_2\text{O}_{11}^{-1}$                             | 633.16661         | 633.16381         | 47         |
|                                                                                                                                                    |                                                                                       |                   |                   |            |
| $[\text{Fe}^{\text{III}}_5\text{O}_3(\text{piv})_6(\text{MeO})_4]^-$                                                                               | $\text{C}_{34}\text{H}_{66}\text{Fe}_5\text{O}_{19}^{-1}$                             | 1058.09506        | 1058.09141        | 26         |
| $[\text{Fe}^{\text{III}}_5\text{O}_3(\text{piv})_7(\text{MeO})_3]^-$                                                                               | $\text{C}_{38}\text{H}_{72}\text{Fe}_5\text{O}_{20}^{-1}$                             | 1128.13692        | 1128.13342        | 46         |
| $[\text{Fe}^{\text{III}}_5\text{O}_3(\text{piv})_8(\text{MeO})_2]^-$                                                                               | $\text{C}_{42}\text{H}_{78}\text{Fe}_5\text{O}_{21}^{-1}$                             | 1198.17879        | 1198.17470        | 21         |
|                                                                                                                                                    |                                                                                       |                   |                   |            |
| $[\text{Fe}^{\text{III}}_7\text{O}_5(\text{piv})_2(\text{tpt-O})(\text{OH})(\text{MeO})_6(\text{MeOH})_4]^-$                                       | $\text{C}_{38}\text{H}_{65}\text{Fe}_6\text{N}_6\text{O}_{21}^{-1}$                   | 1277.03044        | 1277.12255        | 5          |
| $[\text{Fe}^{\text{III}}_7\text{O}_5(\text{piv})_3(\text{tpt-O})(\text{OH})(\text{MeO})_5(\text{MeOH})_4]^-$                                       | $\text{C}_{42}\text{H}_{71}\text{Fe}_6\text{N}_6\text{O}_{22}^{-1}$                   | 1347.07231        | 1347.16500        | 27         |
| $[\text{Fe}^{\text{III}}_7\text{O}_5(\text{piv})_4(\text{tpt-O})(\text{OH})(\text{MeO})_4(\text{MeOH})_4]^-$                                       | $\text{C}_{46}\text{H}_{77}\text{Fe}_6\text{N}_6\text{O}_{23}^{-1}$                   | 1417.11417        | 1417.20691        | 38         |
| $[\text{Fe}^{\text{III}}_7\text{O}_5(\text{piv})_5(\text{tpt-O})(\text{OH})(\text{MeO})_3(\text{MeOH})_4]^-$                                       | $\text{C}_{50}\text{H}_{83}\text{Fe}_6\text{N}_6\text{O}_{24}^{-1}$                   | 1487.15604        | 1487.24853        | 5          |
|                                                                                                                                                    |                                                                                       |                   |                   |            |
| $\{[\text{Fe}^{\text{III}}_7\text{O}_5(\text{piv})_5(\text{tpt-O})(\text{OH})_5(\text{MeO})_2(\text{dioxane})(\text{H}_2\text{O})] + \text{H}\}^-$ | $\text{C}_{49}\text{H}_{79}\text{Fe}_7\text{N}_6\text{O}_{26}^{-1}$                   | 1559.04950        | 1559.17844        | 19         |
| $\{[\text{Fe}^{\text{III}}_7\text{O}_5(\text{piv})_6(\text{tpt-O})(\text{OH})_5(\text{MeO})(\text{dioxane})(\text{H}_2\text{O})] + \text{H}\}^-$   | $\text{C}_{53}\text{H}_{85}\text{Fe}_7\text{N}_6\text{O}_{27}^{-1}$                   | 1629.09137        | 1629.21974        | 64         |
| $\{[\text{Fe}^{\text{III}}_7\text{O}_5(\text{piv})_7(\text{tpt-O})(\text{OH})_5(\text{dioxane})(\text{H}_2\text{O})] + \text{H}\}^-$               | $\text{C}_{57}\text{H}_{91}\text{Fe}_7\text{N}_6\text{O}_{28}^{-1}$                   | 1699.13269        | 1699.26106        | 5          |
| <b>5, ESI+</b>                                                                                                                                     |                                                                                       |                   |                   |            |
| $\{[\text{Fe}^{\text{III}}_7\text{O}_4(\text{piv})_4(\text{tpt-O})(\text{MeO})_8(\text{H}_2\text{O})_5] + \text{H}\}^+$                            | $\text{C}_{46}\text{H}_{83}\text{Fe}_7\text{N}_6\text{O}_{26}^{+1}$                   | 1527.07971        | 1527.20178        | 3          |
| $\{[\text{Fe}^{\text{III}}_7\text{O}_4(\text{piv})_5(\text{tpt-O})(\text{MeO})_7(\text{H}_2\text{O})_5] + \text{H}\}^+$                            | $\text{C}_{50}\text{H}_{89}\text{Fe}_7\text{N}_6\text{O}_{27}^{+1}$                   | 1597.12157        | 1597.24390        | 52         |
| $\{[\text{Fe}^{\text{III}}_7\text{O}_4(\text{piv})_6(\text{tpt-O})(\text{MeO})_6(\text{H}_2\text{O})_5] + \text{H}\}^+$                            | $\text{C}_{54}\text{H}_{95}\text{Fe}_7\text{N}_6\text{O}_{28}^{+1}$                   | 1667.16344        | 1667.28577        | 34         |

|                                                                                                                                  |                                                                                               |                   |                   |            |
|----------------------------------------------------------------------------------------------------------------------------------|-----------------------------------------------------------------------------------------------|-------------------|-------------------|------------|
| [Fe <sup>III</sup> <sub>7</sub> O <sub>4</sub> (piv) <sub>9</sub> (tpt)(MeO) <sub>3</sub> ] <sup>+</sup>                         | C <sub>66</sub> H <sub>102</sub> Fe <sub>7</sub> N <sub>6</sub> O <sub>25</sub> <sup>+1</sup> | 1770.23347        | 1770.23352        | 21         |
| <b>[Fe<sup>III</sup><sub>7</sub>O<sub>4</sub>(piv)<sub>10</sub>(tpt)(MeO)<sub>2</sub>]<sup>+</sup></b>                           | <b>C<sub>70</sub>H<sub>108</sub>Fe<sub>7</sub>N<sub>6</sub>O<sub>26</sub><sup>+1</sup></b>    | <b>1840.27533</b> | <b>1840.27454</b> | <b>100</b> |
| [Fe <sup>III</sup> <sub>7</sub> O <sub>4</sub> (piv) <sub>11</sub> (tpt)(MeO)] <sup>+</sup>                                      | C <sub>74</sub> H <sub>114</sub> Fe <sub>7</sub> N <sub>6</sub> O <sub>27</sub> <sup>+1</sup> | 1910.31720        | 1913.31604        | 43         |
| [Fe <sup>III</sup> <sub>7</sub> O <sub>5</sub> (piv) <sub>8</sub> (tpt-O)(MeO)( <i>i</i> -PrOH)(thf) <sub>3</sub> ] <sup>+</sup> | C <sub>77</sub> H <sub>127</sub> Fe <sub>7</sub> N <sub>6</sub> O <sub>28</sub> <sup>+1</sup> | 1975.41384        | 1975.27930        | 9          |
| [Fe <sup>III</sup> <sub>7</sub> O <sub>5</sub> (piv) <sub>9</sub> (tpt-O)( <i>i</i> -PrOH)(thf) <sub>3</sub> ] <sup>+</sup>      | C <sub>81</sub> H <sub>133</sub> Fe <sub>7</sub> N <sub>6</sub> O <sub>29</sub> <sup>+1</sup> | 2045.45470        | 2045.32104        | 24         |
| <b>5, ESI-</b>                                                                                                                   |                                                                                               |                   |                   |            |
| [Fe <sup>III</sup> <sub>7</sub> O <sub>5</sub> (piv) <sub>5</sub> (tpt-O)( <i>i</i> -PrO)(MeO) <sub>5</sub> ] <sup>-</sup>       | C <sub>55</sub> H <sub>85</sub> Fe <sub>7</sub> N <sub>6</sub> O <sub>23</sub> <sup>-1</sup>  | 1519.06985        | 1519.16357        | 1          |
| [Fe <sup>III</sup> <sub>7</sub> O <sub>5</sub> (piv) <sub>6</sub> (tpt-O)( <i>i</i> -PrO)(MeO) <sub>4</sub> ] <sup>-</sup>       | C <sub>55</sub> H <sub>85</sub> Fe <sub>7</sub> N <sub>6</sub> O <sub>23</sub> <sup>-1</sup>  | 1589.11171        | 1589.20393        | 6          |
| [Fe <sup>III</sup> <sub>7</sub> O <sub>5</sub> (piv) <sub>7</sub> (tpt-O)( <i>i</i> -PrO)(MeO) <sub>3</sub> ] <sup>-</sup>       | C <sub>59</sub> H <sub>91</sub> Fe <sub>7</sub> N <sub>6</sub> O <sub>24</sub> <sup>-1</sup>  | 1659.15358        | 1659.28613        | 21         |
| [Fe <sup>III</sup> <sub>7</sub> O <sub>5</sub> (piv) <sub>8</sub> (tpt-O)( <i>i</i> -PrO)(MeO) <sub>2</sub> ] <sup>-</sup>       | C <sub>63</sub> H <sub>97</sub> Fe <sub>7</sub> N <sub>6</sub> O <sub>25</sub> <sup>-1</sup>  | 1729.19544        | 1729.32385        | 9          |
| [Fe <sup>III</sup> <sub>7</sub> O <sub>5</sub> (piv) <sub>9</sub> (tpt-O)( <i>i</i> -PrO)(MeO)] <sup>-</sup>                     | C <sub>67</sub> H <sub>103</sub> Fe <sub>7</sub> N <sub>6</sub> O <sub>26</sub> <sup>-1</sup> | 1799.23731        | 1799.36267        | 6          |
| [Fe <sup>III</sup> <sub>7</sub> O <sub>4</sub> (piv) <sub>10</sub> (tpt)(MeO) <sub>4</sub> ] <sup>-</sup>                        | C <sub>72</sub> H <sub>114</sub> Fe <sub>7</sub> N <sub>6</sub> O <sub>28</sub> <sup>-1</sup> | 1902.31321        | 1902.31140        | 14         |
| [Fe <sup>III</sup> <sub>7</sub> O <sub>4</sub> (piv) <sub>11</sub> (tpt)(MeO) <sub>3</sub> ] <sup>-</sup>                        | C <sub>76</sub> H <sub>120</sub> Fe <sub>7</sub> N <sub>6</sub> O <sub>29</sub> <sup>-1</sup> | 1972.35507        | 1972.35181        | 82         |
| <b>[Fe<sup>III</sup><sub>7</sub>O<sub>4</sub>(piv)<sub>12</sub>(tpt)(MeO)<sub>2</sub>]<sup>-</sup></b>                           | <b>C<sub>80</sub>H<sub>126</sub>Fe<sub>7</sub>N<sub>6</sub>O<sub>30</sub><sup>-1</sup></b>    | <b>2042.39694</b> | <b>2042.39221</b> | <b>100</b> |
| <b>7, ESI+</b>                                                                                                                   |                                                                                               |                   |                   |            |
| <b>[Mn<sup>II</sup>(ib)(tpt)]<sup>+</sup></b>                                                                                    | <b>C<sub>22</sub>H<sub>19</sub>MnN<sub>6</sub>O<sub>2</sub><sup>+1</sup></b>                  | <b>454.09444</b>  | <b>454.09826</b>  | <b>100</b> |
| [Mn <sup>II</sup> <sub>2</sub> (OH) <sub>2</sub> (ib)(tpt)(MeOH)(H <sub>2</sub> O) <sub>6</sub> ] <sup>+</sup>                   | C <sub>23</sub> H <sub>37</sub> Mn <sub>2</sub> N <sub>6</sub> O <sub>11</sub> <sup>+1</sup>  | 683.12757         | 683.12778         | 13         |
| [Mn <sup>II</sup> <sub>2</sub> (OH) <sub>2</sub> (ib)(tpt)(MeOH) <sub>2</sub> (H <sub>2</sub> O) <sub>5</sub> ] <sup>+</sup>     | C <sub>24</sub> H <sub>39</sub> Mn <sub>2</sub> N <sub>6</sub> O <sub>11</sub> <sup>+1</sup>  | 697.14377         | 697.14358         | 1          |
| [Mn <sup>II</sup> (ib)(tpt) <sub>2</sub> ] <sup>+</sup>                                                                          | C <sub>40</sub> H <sub>31</sub> MnN <sub>12</sub> O <sub>2</sub> <sup>+1</sup>                | 766.20679         | 766.21393         | 4          |

<sup>1</sup> L. Patiny, A. Borel, *J. Chem. Inf. Model.*, 2013, **53**, 1223.

<sup>2</sup> in MeOH

**Table S3.** Crystal data and details of structural determinations for 1–7

|                                                                                                    | <b>1</b><br>[Fe(tpt)(tptH)][FeCl <sub>4</sub> ] <sub>4</sub> ·<br>2(thf)·0.23(H <sub>2</sub> O)       | <b>2</b><br>[Fe(piv)(tpt)(Cl) <sub>2</sub> ]                                    | <b>3</b><br>[Fe <sub>2</sub> O(tpt) <sub>2</sub> Cl <sub>4</sub> ]                | <b>3a</b><br>[Fe(tpt)Cl <sub>2</sub> ] <sub>2</sub> ·2(H <sub>2</sub> O)        | <b>4a</b><br>[Fe <sub>7</sub> O <sub>4</sub> (piv) <sub>12</sub> (tpt-O)]·<br>MeCN |
|----------------------------------------------------------------------------------------------------|-------------------------------------------------------------------------------------------------------|---------------------------------------------------------------------------------|-----------------------------------------------------------------------------------|---------------------------------------------------------------------------------|------------------------------------------------------------------------------------|
| Empirical formula                                                                                  | C <sub>44</sub> H <sub>41.46</sub> Cl <sub>16</sub> Fe <sub>5</sub> N <sub>12</sub> O <sub>2.23</sub> | C <sub>23</sub> H <sub>21</sub> Cl <sub>2</sub> FeN <sub>6</sub> O <sub>2</sub> | C <sub>36</sub> H <sub>24</sub> Cl <sub>4</sub> Fe <sub>2</sub> N <sub>12</sub> O | C <sub>18</sub> H <sub>16</sub> Cl <sub>2</sub> FeN <sub>6</sub> O <sub>2</sub> | C <sub>80</sub> H <sub>123</sub> Fe <sub>7</sub> N <sub>7</sub> O <sub>29</sub>    |
| <i>M<sub>r</sub></i> / g mol <sup>-1</sup>                                                         | 1620.49                                                                                               | 540.21                                                                          | 894.17                                                                            | 475.12                                                                          | 2037.80                                                                            |
| <i>T</i> / K                                                                                       | 100(2)                                                                                                | 100(2)                                                                          | 173(2)                                                                            | 100(2)                                                                          | 100(2)                                                                             |
| Wavelength / Å                                                                                     | 0.71073                                                                                               | 0.71073                                                                         | 0.71073                                                                           | 0.71073                                                                         | 0.71073                                                                            |
| Crystal system                                                                                     | Monoclinic                                                                                            | Monoclinic                                                                      | Triclinic                                                                         | Triclinic                                                                       | Monoclinic                                                                         |
| Space group                                                                                        | <i>P</i> 2 <sub>1</sub> / <i>m</i>                                                                    | <i>P</i> 2 <sub>1</sub> / <i>c</i>                                              | <i>P</i> -1                                                                       | <i>P</i> -1                                                                     | <i>P</i> 2 <sub>1</sub> / <i>n</i>                                                 |
| Unit cell dimensions                                                                               |                                                                                                       |                                                                                 |                                                                                   |                                                                                 |                                                                                    |
| <i>a</i> / Å                                                                                       | 11.9688(17)                                                                                           | 9.2814(9)                                                                       | 8.410(4)                                                                          | 8.7197(17)                                                                      | 24.887(18)                                                                         |
| <i>b</i> / Å                                                                                       | 40.521(6)                                                                                             | 15.3813(15)                                                                     | 9.221(5)                                                                          | 9.1076(18)                                                                      | 12.069(9)                                                                          |
| <i>c</i> / Å                                                                                       | 15.230(2)                                                                                             | 15.9903(1)                                                                      | 11.896(6)                                                                         | 13.374(3)                                                                       | 35.14(2)                                                                           |
| <i>α</i> / °                                                                                       | 90                                                                                                    | 90                                                                              | 81.328(7)                                                                         | 106.09(3)                                                                       | 90                                                                                 |
| <i>β</i> / °                                                                                       | 111.591(4)                                                                                            | 93.392(3)                                                                       | 80.254(7)                                                                         | 99.73(3)                                                                        | 108.01(2)                                                                          |
| <i>γ</i> / °                                                                                       | 90                                                                                                    | 90                                                                              | 83.965(8)                                                                         | 100.60(3)                                                                       | 90                                                                                 |
| <i>V</i> / Å <sup>3</sup>                                                                          | 6867.9(17)                                                                                            | 2278.8(4)                                                                       | 895.8(8)                                                                          | 975.5(4)                                                                        | 10036(12)                                                                          |
| <i>Z</i> , <i>ρ</i> / Mg m <sup>-3</sup>                                                           | 2, 1.427                                                                                              | 4, 1.575                                                                        | 1, 1.658                                                                          | 2, 1.618                                                                        | 4, 1.349                                                                           |
| <i>μ</i> / mm <sup>-1</sup>                                                                        | 1.687                                                                                                 | 0.931                                                                           | 1.160                                                                             | 1.075                                                                           | 1.056                                                                              |
| <i>F</i> (000)                                                                                     | 2915                                                                                                  | 1108                                                                            | 452                                                                               | 484                                                                             | 4264                                                                               |
| Crystal size / mm <sup>3</sup>                                                                     | 0.22 × 0.20 × 0.06                                                                                    | 0.16 × 0.16 × 0.11                                                              | 0.34 × 0.16 × 0.08                                                                | 0.44 × 0.28 × 0.12                                                              | 0.22 × 0.22 × 0.06                                                                 |
| <i>θ</i> range for data collection                                                                 | 1.005° to 24.998°                                                                                     | 2.198° – 25.026°                                                                | 1.75° – 23.21°                                                                    | 2.400° – 24.999°                                                                | 1.219° – 23.817°                                                                   |
| Index ranges                                                                                       | -14 ≤ <i>h</i> ≤ 14,<br>-48 ≤ <i>k</i> ≤ 48,<br>-18 ≤ <i>l</i> ≤ 18                                   | -11 ≤ <i>h</i> ≤ 11,<br>-18 ≤ <i>k</i> ≤ 18,<br>-19 ≤ <i>l</i> ≤ 19             | -9 ≤ <i>h</i> ≤ 3,<br>-10 ≤ <i>k</i> ≤ 9,<br>-13 ≤ <i>l</i> ≤ 11                  | -10 ≤ <i>h</i> ≤ 8,<br>-10 ≤ <i>k</i> ≤ 10,<br>-15 ≤ <i>l</i> ≤ 15              | -28 ≤ <i>h</i> ≤ 28,<br>-13 ≤ <i>k</i> ≤ 13,<br>-39 ≤ <i>l</i> ≤ 37                |
| Reflections collected                                                                              | 75500                                                                                                 | 24615                                                                           | 2890                                                                              | 12311                                                                           | 71446                                                                              |
| Independent reflections                                                                            | 12286 [ <i>R</i> <sub>int</sub> = 0.2133]                                                             | 4019 [ <i>R</i> <sub>int</sub> = 0.1771]                                        | 7123 [ <i>R</i> <sub>int</sub> = 0.0370]                                          | 3438 [ <i>R</i> <sub>int</sub> = 0.0554]                                        | 15422 [ <i>R</i> <sub>int</sub> = 0.2388]                                          |
| Data / restraints / parameters                                                                     | 12286 / 27 / 657                                                                                      | 4019 / 0 / 304                                                                  | 7123 / 137 / 550                                                                  | 3438 / 0 / 262                                                                  | 15422 / 108 / 1196                                                                 |
| Goodness-of-fit on <i>F</i> <sup>2</sup>                                                           | 1.003                                                                                                 | 0.908                                                                           | 1.090                                                                             | 1.084                                                                           | 1.003                                                                              |
| Final <i>R</i> indices [ <i>I</i> > 2σ( <i>I</i> ): <i>R</i> <sub>1</sub> , <i>wR</i> <sub>2</sub> | 0.0946, 0.2070                                                                                        | 0.0440, 0.0937                                                                  | 0.0413, 0.0949                                                                    | 0.0819, 0.2299                                                                  | 0.0832, 0.1766                                                                     |
| <i>R</i> indices (all data): <i>R</i> <sub>1</sub> , <i>wR</i> <sub>2</sub>                        | 0.1646, 0.2252                                                                                        | 0.0694, 0.1005                                                                  | 0.0486, 0.1001                                                                    | 0.0870, 0.2377                                                                  | 0.1590, 0.2189                                                                     |
| Largest diff. peak, hole / e Å <sup>-3</sup>                                                       | 0.927 and -0.724                                                                                      | 0.631, -0.589                                                                   | 3.776, -1.588                                                                     | 0.682, -1.157                                                                   | 0.739, -1.053                                                                      |

|                                                                                                    | <b>4b</b><br>[Fe <sub>7</sub> O <sub>4</sub> (piv) <sub>12</sub> (tpt-O)]<br>4(diox) | <b>5</b><br>[Fe <sub>7</sub> O <sub>4</sub> (piv) <sub>11</sub> (tpt-O)<br>( <i>i</i> -PrO)( <i>i</i> -PrOH)]<br>·0.75( <i>i</i> -PrOH) | <b>6</b><br>[Mn(NO <sub>3</sub> )(tpt)<br>(H <sub>2</sub> O) <sub>2</sub> ](NO <sub>3</sub> ) | <b>7</b><br>[Mn(ib)(Cl)(tpt)<br>(MeOH)]·MeOH                        |  |
|----------------------------------------------------------------------------------------------------|--------------------------------------------------------------------------------------|-----------------------------------------------------------------------------------------------------------------------------------------|-----------------------------------------------------------------------------------------------|---------------------------------------------------------------------|--|
| Empirical formula                                                                                  | C <sub>94</sub> H <sub>152</sub> Fe <sub>7</sub> N <sub>6</sub> O <sub>37</sub>      | C <sub>81.25</sub> H <sub>132</sub> Fe <sub>7</sub> N <sub>6</sub> O <sub>29.75</sub>                                                   | C <sub>18</sub> H <sub>16</sub> MnN <sub>8</sub> O <sub>8</sub>                               | C <sub>24</sub> H <sub>27</sub> ClMnN <sub>6</sub> O <sub>4</sub>   |  |
| <i>M<sub>r</sub></i> / g mol <sup>-1</sup>                                                         | 2349.17                                                                              | 2059.87                                                                                                                                 | 527.33                                                                                        | 553.90                                                              |  |
| <i>T</i> / K                                                                                       | 100(2)                                                                               | 100(2)                                                                                                                                  | 293(2)                                                                                        | 293(2)                                                              |  |
| Wavelength / Å                                                                                     | 0.71073                                                                              | 0.71073                                                                                                                                 | 0.71073                                                                                       | 0.71073                                                             |  |
| Crystal system                                                                                     | Triclinic                                                                            | Triclinic                                                                                                                               | Monoclinic                                                                                    | Triclinic                                                           |  |
| Space group                                                                                        | <i>P</i> -1                                                                          | <i>P</i> -1                                                                                                                             | <i>C</i> 2/ <i>c</i>                                                                          | <i>P</i> -1                                                         |  |
| Unit cell dimensions                                                                               |                                                                                      |                                                                                                                                         |                                                                                               |                                                                     |  |
| <i>a</i> / Å                                                                                       | 12.6917(11)                                                                          | 16.277(6)                                                                                                                               | 20.4359(8)                                                                                    | 8.8127(6)                                                           |  |
| <i>b</i> / Å                                                                                       | 18.5226(17)                                                                          | 22.189(8)                                                                                                                               | 13.3612(4)                                                                                    | 10.9546(5)                                                          |  |
| <i>c</i> / Å                                                                                       | 24.683(2)                                                                            | 31.533(11)                                                                                                                              | 16.7266(6)                                                                                    | 15.1293(6)                                                          |  |
| $\alpha$                                                                                           | 93.070(2)                                                                            | 70.195(9)                                                                                                                               | 90                                                                                            | 71.115(4)                                                           |  |
| $\beta$                                                                                            | 93.369(2)                                                                            | 79.277(12)                                                                                                                              | 107.782(4)                                                                                    | 81.894(4)                                                           |  |
| $\gamma$                                                                                           | 97.272(2)                                                                            | 72.259(11)                                                                                                                              | 90                                                                                            | 68.777(5)                                                           |  |
| <i>V</i> / Å <sup>3</sup>                                                                          | 5735.1(9)                                                                            | 10162(6)                                                                                                                                | 4348.9(3)                                                                                     | 1287.75(12)                                                         |  |
| <i>Z</i> , $\rho$ / Mg m <sup>-3</sup>                                                             | 2, 1.360                                                                             | 4, 1.346                                                                                                                                | 8, 1.611                                                                                      | 2, 1.429                                                            |  |
| $\mu$ / mm <sup>-1</sup>                                                                           | 0.939                                                                                | 1.044                                                                                                                                   | 0.672                                                                                         | 0.658                                                               |  |
| <i>F</i> (000)                                                                                     | 2472                                                                                 | 4326                                                                                                                                    | 2152                                                                                          | 574                                                                 |  |
| Crystal size / mm <sup>3</sup>                                                                     | 0.25 × 0.21 × 0.16                                                                   | 0.25 × 0.14 × 0.09                                                                                                                      | 0.4 × 0.2 × 0.12                                                                              | 0.53 × 0.20 × 0.08                                                  |  |
| $\theta$ range for data collection                                                                 | 1.94° – 24.41°                                                                       | 1.011° – 25.000°                                                                                                                        | 3.307° to 25.495°                                                                             | 2.992° – 25.541°                                                    |  |
| Index ranges                                                                                       | -14 ≤ <i>h</i> ≤ 14,<br>-21 ≤ <i>k</i> ≤ 21,<br>-28 ≤ <i>l</i> ≤ 28                  | -19 ≤ <i>h</i> ≤ 19,<br>-26 ≤ <i>k</i> ≤ 26,<br>-37 ≤ <i>l</i> ≤ 37                                                                     | -24 ≤ <i>h</i> ≤ 15,<br>-16 ≤ <i>k</i> ≤ 10,<br>-14 ≤ <i>l</i> ≤ 20                           | -10 ≤ <i>h</i> ≤ 10,<br>-12 ≤ <i>k</i> ≤ 13,<br>-13 ≤ <i>l</i> ≤ 18 |  |
| Reflections collected                                                                              | 58376                                                                                | 84896                                                                                                                                   | 7918                                                                                          | 7205                                                                |  |
| Independent reflections                                                                            | 18881 [ <i>R</i> <sub>int</sub> = 0.0628]                                            | 35797 [ <i>R</i> <sub>int</sub> = 0.1783]                                                                                               | 4029 [ <i>R</i> <sub>int</sub> = 0.0291]                                                      | 4782 [ <i>R</i> <sub>int</sub> = 0.0275]                            |  |
| Data / restraints / parameters                                                                     | 18881 / 70 / 1375                                                                    | 35797 / 217 / 2340                                                                                                                      | 4029 / 1 / 318                                                                                | 4782 / 0 / 330                                                      |  |
| Goodness-of-fit on <i>F</i> <sup>2</sup>                                                           | 1.049                                                                                | 0.989                                                                                                                                   | 1.079                                                                                         | 1.006                                                               |  |
| Final <i>R</i> indices [ <i>I</i> > 2σ( <i>I</i> ): <i>R</i> <sub>1</sub> , <i>wR</i> <sub>2</sub> | 0.0501, 0.1151                                                                       | 0.0773, 0.1265                                                                                                                          | 0.0540, 0.1350                                                                                | 0.0490, 0.1186                                                      |  |
| <i>R</i> indices (all data): <i>R</i> <sub>1</sub> , <i>wR</i> <sub>2</sub>                        | 0.0729, 0.1295                                                                       | 0.1926, 0.1666                                                                                                                          | 0.0803, 0.1491                                                                                | 0.0687, 0.1351                                                      |  |
| Largest diff. peak, hole / e Å <sup>-3</sup>                                                       | 0.844, -0.835                                                                        | 0.904, -0.998                                                                                                                           | 1.002, -0.583                                                                                 | 0.523, -0.450                                                       |  |

**Table S4.** Selected bond distances (Å) for **1–7**

| <b>1</b>                                                                                           |          |                        |           | <b>2</b> |           | <b>3</b>  |            | <b>4a</b> |          |         |          |          |          |
|----------------------------------------------------------------------------------------------------|----------|------------------------|-----------|----------|-----------|-----------|------------|-----------|----------|---------|----------|----------|----------|
| Fe1–N8                                                                                             | 1.844(8) | Fe3–Cl5                | 2.207(3)  | Fe1–O1   | 2.110(2)  | Fe1–O1    | 1.805(2)   | Fe1–O2    | 1.958(5) | Fe4–O18 | 2.023(6) |          |          |
| Fe1–N2                                                                                             | 1.873(7) | Fe4–Cl9                | 2.176(5)  | Fe1–O2   | 2.151(2)  | Fe1–N2    | 2.136(9)   | Fe1–O1    | 1.992(5) | Fe4–O5  | 2.118(5) |          |          |
| Fe1–N3                                                                                             | 1.984(8) | Fe4–Cl11               | 2.186(3)  | Fe1–N2   | 2.170(3)  | Fe1–N1    | 2.198(8)   | Fe1–O6    | 2.011(6) | Fe4–N6  | 2.175(7) |          |          |
| Fe1–N1                                                                                             | 1.995(7) | Fe4–Cl11 <sup>#1</sup> | 2.186(3)  | Fe1–N3   | 2.290(3)  | Fe1–N5    | 2.218(8)   | Fe1–O8    | 2.023(6) | Fe5–O3  | 1.951(6) |          |          |
| Fe1–N9                                                                                             | 1.999(8) | Fe4–Cl10               | 2.204(5)  | Fe1–N1   | 2.293(3)  | Fe1–Cl2   | 2.332(3)   | Fe1–O12   | 2.040(6) | Fe5–O4  | 1.995(5) |          |          |
| Fe1–N7                                                                                             | 2.015(7) | Fe5–Cl14               | 2.163(14) | Fe1–Cl1  | 2.3000(2) | Fe1–Cl1   | 2.398(4)   | Fe1–O10   | 2.049(6) | Fe5–O19 | 2.012(6) |          |          |
| Fe2–Cl3                                                                                            | 2.163(4) | Fe5–Cl13               | 2.183(4)  | Fe1–Cl2  | 2.3416(2) |           |            | Fe2–O2    | 1.900(5) | Fe5–O28 | 2.015(6) |          |          |
| Fe2–Cl2                                                                                            | 2.169(3) | Fe5–Cl15               | 2.183(5)  |          |           |           |            | Fe2–O1    | 1.929(6) | Fe5–O5  | 2.016(5) |          |          |
| Fe2–Cl4                                                                                            | 2.189(3) | Fe5–Cl12               | 2.195(3)  |          |           | <b>3a</b> |            | Fe2–O14   | 2.005(6) | Fe5–O20 | 2.016(6) |          |          |
| Fe2–Cl1                                                                                            | 2.194(4) | Fe6–Cl17               | 2.117(7)  |          |           | Fe1–N2    | 2.102(4)   | Fe2–O13   | 2.082(6) | Fe6–O3  | 1.884(5) |          |          |
| Fe3–Cl6                                                                                            | 2.173(3) | Fe6–Cl16 <sup>#1</sup> | 2.173(4)  |          |           | Fe1–N1    | 2.211(4)   | Fe2–N2    | 2.106(7) | Fe6–O24 | 1.970(6) |          |          |
| Fe3–Cl7                                                                                            | 2.176(3) | Fe6–Cl16               | 2.173(4)  |          |           | Fe1–N3    | 2.220(4)   | Fe2–N1    | 2.156(7) | Fe6–O21 | 2.035(6) |          |          |
| Fe3–Cl8                                                                                            | 2.201(3) | Fe6–Cl18               | 2.191(8)  |          |           | Fe1–Cl2   | 2.2930(17) | Fe3–O1    | 1.843(6) | Fe6–O26 | 2.042(6) |          |          |
|                                                                                                    |          |                        |           |          |           | Fe1–Cl1   | 2.3278(14) | Fe3–O7    | 2.013(6) | Fe6–O23 | 2.098(6) |          |          |
|                                                                                                    |          |                        |           |          |           |           |            | Fe3–O9    | 2.014(6) | Fe6–O22 | 2.126(6) |          |          |
|                                                                                                    |          |                        |           |          |           |           |            | Fe3–O15   | 2.057(6) | Fe7–O3  | 1.887(5) |          |          |
|                                                                                                    |          |                        |           |          |           |           |            | Fe3–O16   | 2.067(6) | Fe7–O29 | 2.019(6) |          |          |
|                                                                                                    |          |                        |           |          |           |           |            | Fe3–O17   | 2.167(6) | Fe7–O27 | 2.021(6) |          |          |
|                                                                                                    |          |                        |           |          |           |           |            | Fe4–O2    | 1.847(5) | Fe7–O25 | 2.043(6) |          |          |
| Symmetry transformations used to generate equivalent atoms: #1 <i>x</i> , $-\gamma+1/2$ , <i>z</i> |          |                        |           |          |           |           |            | Fe4–O4    | 2.013(5) | Fe7–N3  | 2.113(7) |          |          |
|                                                                                                    |          |                        |           |          |           |           |            | Fe4–O11   | 2.020(5) | Fe7–N5  | 2.166(7) |          |          |
| <b>4b</b>                                                                                          |          |                        |           | <b>5</b> |           |           |            | <b>6</b>  |          |         |          | <b>7</b> |          |
| Fe1–O2                                                                                             | 1.953(3) | Fe5–O17                | 2.010(3)  | Fe1–O1   | 1.854(5)  | Fe5–O18   | 2.014(5)   | Fe10–O40  | 1.998(5) | Mn1–O2W | 2.138(3) | Mn1–O2   | 2.226(2) |
| Fe1–O1                                                                                             | 1.967(3) | Fe5–O18                | 2.018(3)  | Fe1–O8   | 2.010(5)  | Fe5–O5    | 2.078(5)   | Fe10–O45  | 1.999(6) | Mn1–O1W | 2.192(2) | Mn1–O1   | 2.294(2) |
| Fe1–O28                                                                                            | 1.995(3) | Fe5–O5                 | 2.022(3)  | Fe1–O10  | 2.024(5)  | Fe6–O4    | 1.819(5)   | Fe10–O43  | 2.034(5) | Mn1–N2  | 2.232(3) | Mn1–N2   | 2.295(2) |
| Fe1–O14                                                                                            | 2.028(3) | Fe6–O3                 | 1.874(3)  | Fe1–O6   | 2.026(5)  | Fe6–O22   | 2.016(5)   | Fe10–O38  | 2.034(6) | Mn1–O3  | 2.269(2) | Mn1–O3   | 2.307(2) |
| Fe1–O8                                                                                             | 2.028(3) | Fe6–O23                | 1.998(3)  | Fe1–O12  | 2.026(5)  | Fe6–O24   | 2.017(5)   | Fe11–O31  | 1.841(5) | Mn1–N3  | 2.351(3) | Mn1–N1   | 2.399(2) |
| Fe1–O6                                                                                             | 2.046(3) | Fe6–O21                | 2.020(3)  | Fe1–O28  | 2.114(5)  | Fe6–O19   | 2.032(5)   | Fe11–O46  | 2.000(6) | Mn1–N1  | 2.378(3) | Mn1–N3   | 2.412(2) |
| Fe2–O2                                                                                             | 1.894(3) | Fe6–O25                | 2.036(3)  | Fe2–O1   | 1.954(5)  | Fe6–O20   | 2.082(5)   | Fe11–O32  | 2.020(5) | Mn1–O2  | 2.411(2) | Mn1–Cl1  | 2.486(1) |
| Fe2–O1                                                                                             | 1.939(3) | Fe6–O26                | 2.099(3)  | Fe2–O2   | 1.954(5)  | Fe6–O21   | 2.127(5)   | Fe11–O47  | 2.050(6) |         |          |          |          |
| Fe2–O13                                                                                            | 2.006(3) | Fe6–O27                | 2.127(3)  | Fe2–O14  | 2.006(5)  | Fe7–O4    | 1.880(5)   | Fe11–O34  | 2.093(5) |         |          |          |          |
| Fe2–O15                                                                                            | 2.049(3) | Fe7–O3                 | 1.868(3)  | Fe2–O9   | 2.024(5)  | Fe7–O29   | 1.968(5)   | Fe11–N11  | 2.195(7) |         |          |          |          |
| Fe2–N2                                                                                             | 2.137(3) | Fe7–O19                | 2.002(3)  | Fe2–O7   | 2.032(5)  | Fe7–O23   | 2.019(5)   | Fe12–O33  | 1.949(5) |         |          |          |          |
| Fe2–N1                                                                                             | 2.174(3) | Fe7–O24                | 2.014(3)  | Fe2–O26  | 2.034(5)  | Fe7–O25   | 2.061(5)   | Fe12–O48  | 1.974(6) |         |          |          |          |
| Fe3–O1                                                                                             | 1.835(3) | Fe7–O22                | 2.053(3)  | Fe3–O2   | 1.898(5)  | Fe7–N4    | 2.108(6)   | Fe12–O32  | 1.977(5) |         |          |          |          |
| Fe3–O7                                                                                             | 1.987(3) | Fe7–N3                 | 2.122(3)  | Fe3–O1   | 1.929(5)  | Fe7–N5    | 2.114(6)   | Fe12–O51  | 1.988(5) |         |          |          |          |
| Fe3–O12                                                                                            | 2.040(3) | Fe7–N5                 | 2.150(3)  | Fe3–O11  | 2.024(5)  | Fe8–O30   | 1.855(5)   | Fe12–O58  | 2.003(6) |         |          |          |          |
| Fe3–O9                                                                                             | 2.047(3) |                        |           | Fe3–O27  | 2.065(5)  | Fe8–O41   | 2.010(5)   | Fe12–O34  | 2.068(5) |         |          |          |          |

|         |          |  |  |         |          |          |          |          |          |  |  |  |  |
|---------|----------|--|--|---------|----------|----------|----------|----------|----------|--|--|--|--|
| Fe3-O11 | 2.059(3) |  |  | Fe3-N2  | 2.161(6) | Fe8-O37  | 2.028(6) | Fe13-O33 | 1.830(5) |  |  |  |  |
| Fe3-O10 | 2.162(3) |  |  | Fe3-N1  | 2.177(6) | Fe8-O39  | 2.052(6) | Fe13-O53 | 1.998(5) |  |  |  |  |
| Fe4-O2  | 1.845(3) |  |  | Fe4-O2  | 1.856(5) | Fe8-O35  | 2.060(6) | Fe13-O55 | 2.010(5) |  |  |  |  |
| Fe4-O16 | 1.994(3) |  |  | Fe4-O15 | 2.000(6) | Fe8-O57  | 2.099(6) | Fe13-O52 | 2.016(5) |  |  |  |  |
| Fe4-O29 | 2.013(3) |  |  | Fe4-O16 | 2.018(5) | Fe9-O31  | 1.888(5) | Fe13-O49 | 2.109(5) |  |  |  |  |
| Fe4-O4  | 2.023(3) |  |  | Fe4-O3  | 2.036(5) | Fe9-O30  | 1.939(5) | Fe13-O50 | 2.121(6) |  |  |  |  |
| Fe4-O5  | 2.138(3) |  |  | Fe4-O5  | 2.084(5) | Fe9-O36  | 2.008(5) | Fe14-O33 | 1.878(5) |  |  |  |  |
| Fe4-N6  | 2.172(3) |  |  | Fe4-N3  | 2.176(6) | Fe9-O44  | 2.057(5) | Fe14-O58 | 2.018(5) |  |  |  |  |
| Fe5-O3  | 1.975(3) |  |  | Fe5-O4  | 1.949(5) | Fe9-N12  | 2.151(6) | Fe14-O54 | 2.021(6) |  |  |  |  |
| Fe5-O4  | 1.986(3) |  |  | Fe5-O3  | 1.964(5) | Fe9-N10  | 2.164(6) | Fe14-O56 | 2.067(6) |  |  |  |  |
| Fe5-O20 | 2.004(3) |  |  | Fe5-O17 | 1.982(5) | Fe10-O30 | 1.955(5) | Fe14-N8  | 2.109(6) |  |  |  |  |
|         |          |  |  | Fe5-O29 | 2.000(5) | Fe10-O31 | 1.960(5) | Fe14-N7  | 2.127(6) |  |  |  |  |

**Table S5.** Continuous shape measures (CShM) of the coordination geometries of compounds **1–7** using SHAPE v2.0 [1].\*

| CN 4         | Seesaw<br>( $C_{2v}$ ) | Tetra-<br>hedron<br>( $T_d$ ) | Square ( $D_{4h}$ ) |
|--------------|------------------------|-------------------------------|---------------------|
| <b>1: Fe</b> | 8.712                  | 0.078                         | 31.199              |

| CN 5          | Johnson<br>J12 ( $D_{3h}$ ) | Square<br>pyramid<br>( $C_{4v}$ ) | Trigonal<br>bipyramid<br>( $D_{3h}$ ) | Vacant<br>octahedron<br>( $C_{4v}$ ) | Pentagon ( $D_{5h}$ ) |
|---------------|-----------------------------|-----------------------------------|---------------------------------------|--------------------------------------|-----------------------|
| <b>3a: Fe</b> | 9.310                       | 2.017                             | 5.950                                 | 3.750                                | 30.789                |

| CN 6           | Johnson<br>J2 ( $C_{5v}$ ) | Trigonal<br>prism<br>( $D_{3h}$ ) | Octahedron<br>( $O_h$ ) | Pentagonal<br>pyramid ( $C_{5v}$ ) | Hexagon ( $D_{6h}$ ) |
|----------------|----------------------------|-----------------------------------|-------------------------|------------------------------------|----------------------|
| <b>1: Fe</b>   | 26.247                     | 10.422                            | 2.491                   | 22.186                             | 33.564               |
| <b>3: Fe</b>   | 28.341                     | 13.835                            | 2.862                   | 24.373                             | 34.355               |
| <b>4a: Fe1</b> | 27.474                     | 11.789                            | 0.877                   | 23.743                             | 32.793               |
| <b>4a: Fe2</b> | 28.845                     | 13.552                            | 0.836                   | 25.613                             | 29.898               |
| <b>4a: Fe3</b> | 28.772                     | 13.567                            | 1.661                   | 24.649                             | 31.814               |
| <b>4a: Fe4</b> | 27.959                     | 13.660                            | 0.984                   | 24.054                             | 29.551               |
| <b>4a: Fe5</b> | 31.011                     | 14.865                            | 0.369                   | 27.707                             | 31.025               |
| <b>4a: Fe6</b> | 28.891                     | 14.756                            | 1.552                   | 24.918                             | 29.856               |

|                |        |        |       |        |        |
|----------------|--------|--------|-------|--------|--------|
| <b>4a:</b> Fe7 | 30.569 | 14.993 | 0.548 | 26.921 | 31.946 |
| <b>4b:</b> Fe1 | 29.301 | 13.052 | 0.582 | 25.605 | 32.757 |
| <b>4b:</b> Fe2 | 29.245 | 13.669 | 0.800 | 26.037 | 29.428 |
| <b>4b:</b> Fe3 | 29.151 | 13.208 | 1.649 | 25.068 | 31.763 |
| <b>4b:</b> Fe4 | 28.803 | 13.468 | 0.873 | 24.703 | 30.581 |
| <b>4b:</b> Fe5 | 30.729 | 14.204 | 0.379 | 27.154 | 31.089 |
| <b>4b:</b> Fe6 | 26.853 | 13.247 | 1.915 | 22.918 | 30.156 |
| <b>4b:</b> Fe7 | 30.131 | 14.695 | 0.637 | 26.475 | 32.115 |
| <b>5:</b> Fe1  | 30.977 | 14.798 | 0.352 | 27.192 | 31.218 |
| <b>5:</b> Fe2  | 30.798 | 14.427 | 0.454 | 27.329 | 31.063 |
| <b>5:</b> Fe3  | 28.622 | 13.524 | 0.901 | 25.276 | 29.705 |
| <b>5:</b> Fe4  | 29.690 | 12.892 | 0.787 | 25.647 | 31.483 |
| <b>5:</b> Fe5  | 30.238 | 14.080 | 0.539 | 26.717 | 30.860 |
| <b>5:</b> Fe6  | 24.932 | 11.957 | 2.195 | 21.285 | 30.979 |
| <b>5:</b> Fe7  | 28.554 | 12.031 | 0.957 | 24.993 | 29.811 |

| CN 7         | Johnson J7 ( $C_{3v}$ ) | Johnson J13 ( $D_{5h}$ ) | Capped trigonal prism ( $C_{2v}$ ) | Capped octahedron ( $C_{3v}$ ) | Pentagonal bipyramid ( $D_{5h}$ ) | Hexagonal pyramid ( $C_{6v}$ ) | Heptagon ( $D_{7h}$ ) |
|--------------|-------------------------|--------------------------|------------------------------------|--------------------------------|-----------------------------------|--------------------------------|-----------------------|
| <b>2:</b> Fe | 23.974                  | 5.088                    | 5.823                              | 7.466                          | 0.569                             | 24.909                         | 34.425                |
| <b>6:</b> Mn | 22.838                  | 3.511                    | 6.325                              | 8.212                          | 1.034                             | 24.265                         | 32.018                |
| <b>7:</b> Mn | 23.690                  | 5.103                    | 6.615                              | 8.454                          | 0.991                             | 24.726                         | 33.044                |

\*A value of zero corresponds to an exact match of the corresponding center to the ideal geometry. Listed Johnson solids are: pentagonal pyramid (J2), elongated triangular pyramid (J7), trigonal bipyramid (J12) and pentagonal bipyramid (J13).

[1] (a) M. Lluell, D. Casanova, J. Cirera, P. Alemany, S. Alvarez, *SHAPE 2.0*, Universitat de Barcelona, Barcelona, **2010**; (b) S. Alvarez, P. Alemany, D. Casanova, J. Cirera, M. Lluell, D. Avnir, *Coord. Chem. Rev.* **2005**, 249, 1693–1708.

**Table S6.** Bond valence sum (BVS) calculations for metal atoms in **1–7**

| Compound  | Atom | BVS value | Compound  | Atom | BVS value | Compound  | Atom      | BVS value |
|-----------|------|-----------|-----------|------|-----------|-----------|-----------|-----------|
| <b>1</b>  |      |           | <b>4a</b> |      |           | <b>4b</b> |           |           |
|           | Fe1  | 2.974     |           | Fe1  | 3.05      |           | Fe1       | 3.12      |
|           | Fe2  | 3.15      |           | Fe2  | 3.09      |           | Fe2       | 3.08      |
|           | Fe3  | 3.06      |           | Fe3  | 3.02      |           | Fe3       | 3.06      |
|           | Fe4  | 3.07      |           | Fe4  | 3.03      |           | Fe4       | 3.06      |
|           | Fe5  | 3.13      |           | Fe5  | 3.13      |           | Fe5       | 3.11      |
|           | Fe6  | 3.29      |           | Fe6  | 2.99      |           | Fe6       | 2.99      |
|           |      |           |           | Fe7  | 2.99      |           | Fe7       | 3.06      |
| <b>2</b>  |      |           |           |      |           |           |           |           |
|           | Fe1  | 2.94      | Compound  | Atom | BVS value | Atom      | BVS value |           |
| <b>3</b>  |      |           | <b>5</b>  |      |           |           |           |           |
|           | Fe1  | 2.95      |           | Fe1  | 3.12      | Fe8       | 3.06      |           |
| <b>3a</b> |      |           |           | Fe2  | 3.13      | Fe9       | 3.08      |           |
|           | Fe1  | 2.02      |           | Fe3  | 3.01      | Fe10      | 3.17      |           |
| <b>6</b>  |      |           |           | Fe4  | 3.05      | Fe11      | 3.04      |           |
|           | Mn1  | 1.98      |           | Fe5  | 3.18      | Fe12      | 3.20      |           |
| <b>7</b>  |      |           |           | Fe6  | 3.11      | Fe13      | 3.12      |           |
|           | Mn1  | 1.94      |           | Fe7  | 3.14      | Fe14      | 3.03      |           |



**Table S7.** The effect of compounds **6** and **7** on the proteolytic activity of fungal strain *Fusarium gibbosum* CNMN FD 12

| Compound | Concentration, % | Neutral proteases (pH 7.4) |                           |                     |                           | Alkaline proteases (pH 9.0) |                           |                     |                           |
|----------|------------------|----------------------------|---------------------------|---------------------|---------------------------|-----------------------------|---------------------------|---------------------|---------------------------|
|          |                  | 5 <sup>th</sup> day        |                           | 6 <sup>th</sup> day |                           | 5 <sup>th</sup> day         |                           | 6 <sup>th</sup> day |                           |
|          |                  | u/mL                       | %, related to the control | u/mL                | %, related to the control | u/mL                        | %, related to the control | u/mL                | %, related to the control |
| <b>6</b> | 0.0005           | 25.52                      | 141.6                     | 25.52               | 77.3                      | 19.45                       | 100.0                     | 37.47               | 172.1                     |
|          | 0.0010           | 67.47                      | 374.4 / 204.4**           | 33.01               | 100.0                     | 79.41                       | 408.3 / 364.8**           | 38.89               | 178.6                     |
|          | 0.0015           | 56.51                      | 313.6 / 171.3**           | 36.04               | 109.2                     | 59.96                       | 308.3 / 275.4**           | 33.01               | 151.6                     |
| <b>7</b> | 0.0005           | 22.48                      | 124.8                     | 49.25               | 149.2                     | 70.48                       | 362.4 / 323.7**           | 40.51               | 186.1                     |
|          | 0.0010           | 23.91                      | 132.7                     | 63.41               | 192.1                     | 88.57                       | 455.4 / 406.8**           | 53.88               | 247.5                     |
|          | 0.0015           | 21.05                      | 116.8                     | 56.51               | 171.2                     | 85.47                       | 439.4 / 392.6**           | 41.93               | 192.6                     |
| Control* | -                | 18.02                      | 100.0                     | 33.01               | 100.0                     | 19.45                       | 100.0                     | 21.77               | 100.0                     |

\* cultivated in the absence of coordination compounds

\*\*374.4 / 204.4 - %, related to the control of d day / %, related to the maximal value of control (6<sup>th</sup> day)**Table S8.** The effect of compounds **6** and **7** on the proteolytic activity of fungal strain *Trichoderma koningii* Oudemans CNMN FD 15

| Compound | Concentration, % | Neutral proteases (pH 7.4) |                           |                      |                           | Alkaline proteases (pH 9.0) |                           |                      |                           |
|----------|------------------|----------------------------|---------------------------|----------------------|---------------------------|-----------------------------|---------------------------|----------------------|---------------------------|
|          |                  | 9 <sup>th</sup> day        |                           | 10 <sup>th</sup> day |                           | 9 <sup>th</sup> day         |                           | 10 <sup>th</sup> day |                           |
|          |                  | u/mL                       | %, related to the control | u/mL                 | %, related to the control | u/mL                        | %, related to the control | u/mL                 | %, related to the control |
| <b>6</b> | 0.0005           | 71.91                      | 140.9                     | 51.03                | 366.6                     | 10.52                       | 44.7                      | 16.42                | 184.0                     |
|          | 0.0010           | 55.49                      | 108.7                     | 49.43                | 355.1                     | 10.52                       | 44.7                      | 16.42                | 184.0                     |
|          | 0.0015           | 44.96                      | 88.1                      | 49.43                | 355.1                     | 13.56                       | 57.6                      | 23.91                | 268.0                     |
| <b>7</b> | 0.0005           | 94.39                      | 185.0                     | 61.38                | 440.9                     | 10.52                       | 44.7                      | 13.56                | 152.0                     |
|          | 0.0010           | 79.41                      | 155.6                     | 61.38                | 440.9                     | 10.52                       | 44.7                      | 16.42                | 184.0                     |
|          | 0.0015           | 62.98                      | 123.4                     | 53.88                | 387.1                     | 13.56                       | 57.6                      | 25.52                | 286.0                     |
| Control* | -                | 51.03                      | 100.0                     | 13.92                | 100.0                     | 23.55                       | 100                       | 8.92                 | 100.0                     |

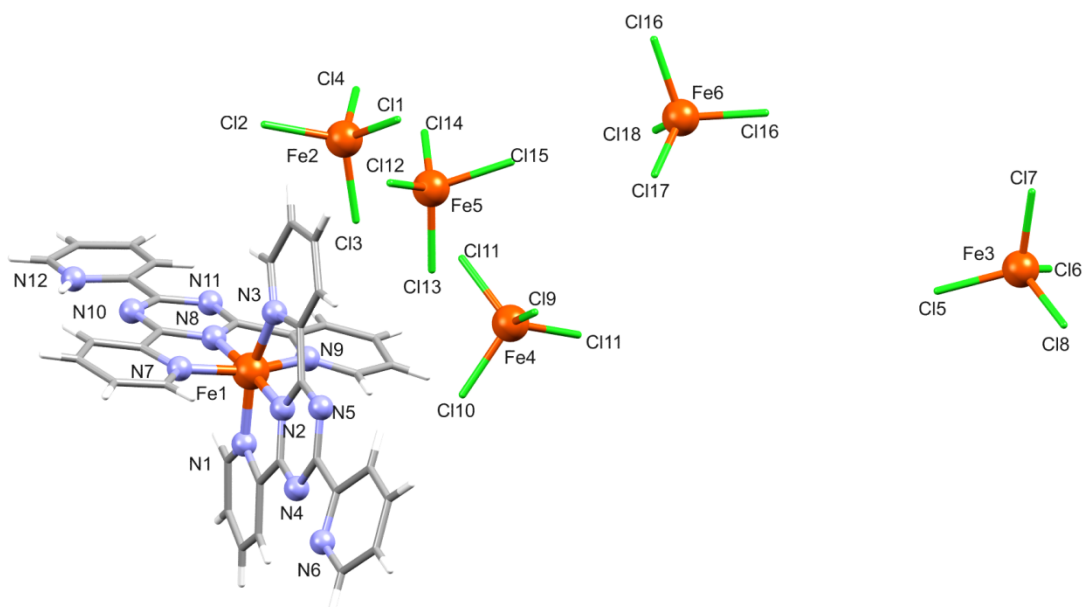

**Figure S1.** Asymmetric unit in the solid-state structure of  $[\text{Fe}(\text{tpt})(\text{tptH})][\text{FeCl}_4]_4$  (**1**) with a partial atom numbering. Tetrahydrofuran and water molecules are omitted.

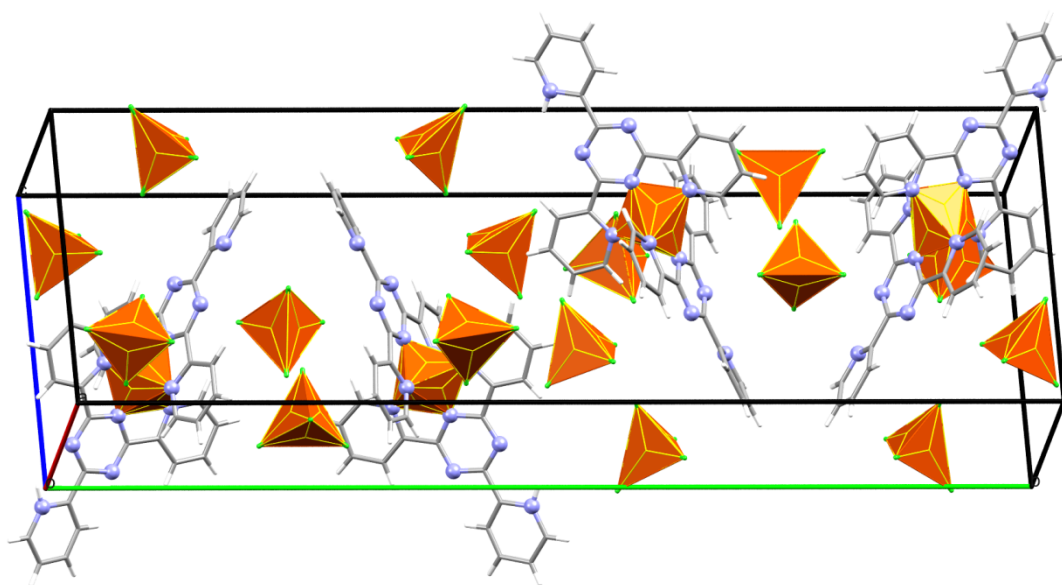

**Figure S2.** Packing diagram for **1**.  $[\text{FeCl}_4]$ : brown polyhedra. Tetrahydrofuran and water molecules are omitted.

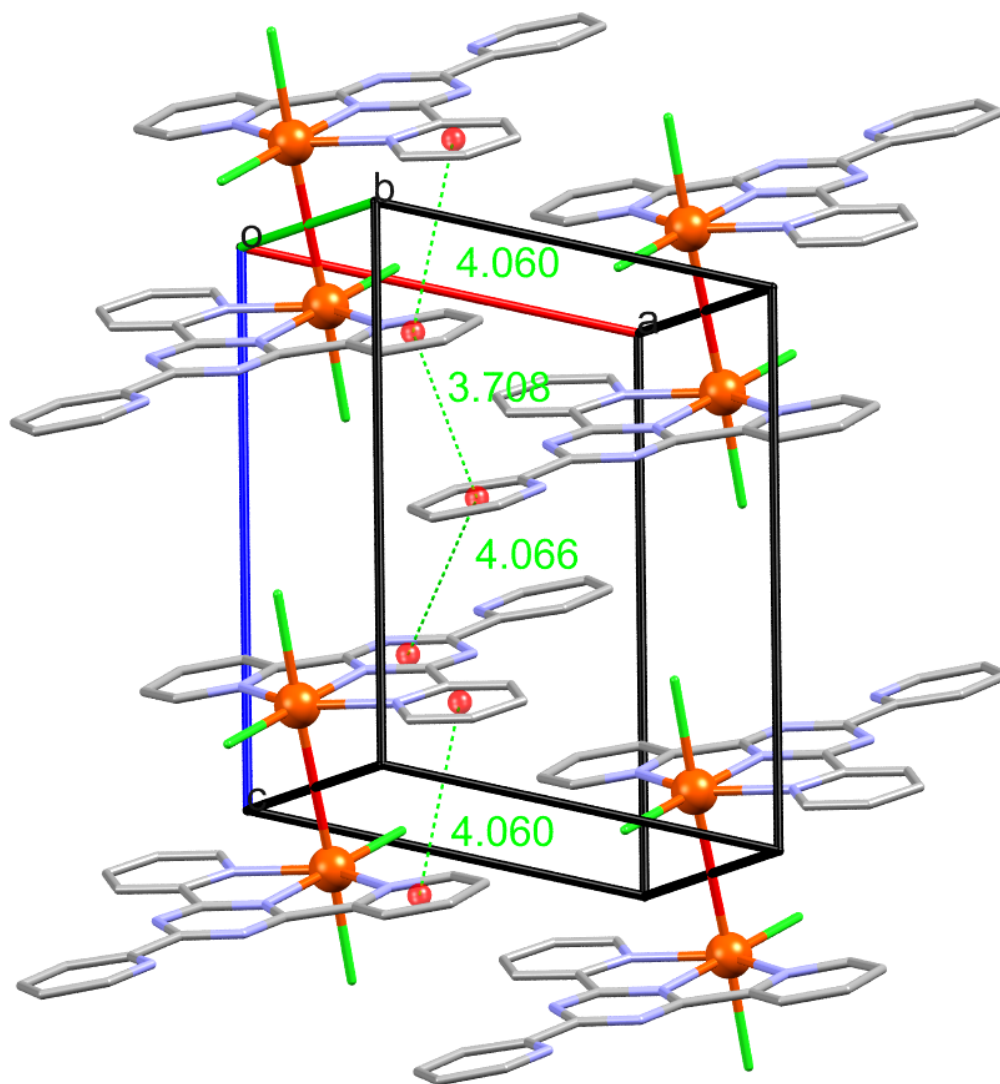

**Figure S3.** Packing diagram showing the  $\pi$ - $\pi$  interactions in [Fe<sub>2</sub>O(tpt)<sub>2</sub>Cl<sub>4</sub>] (**3**).

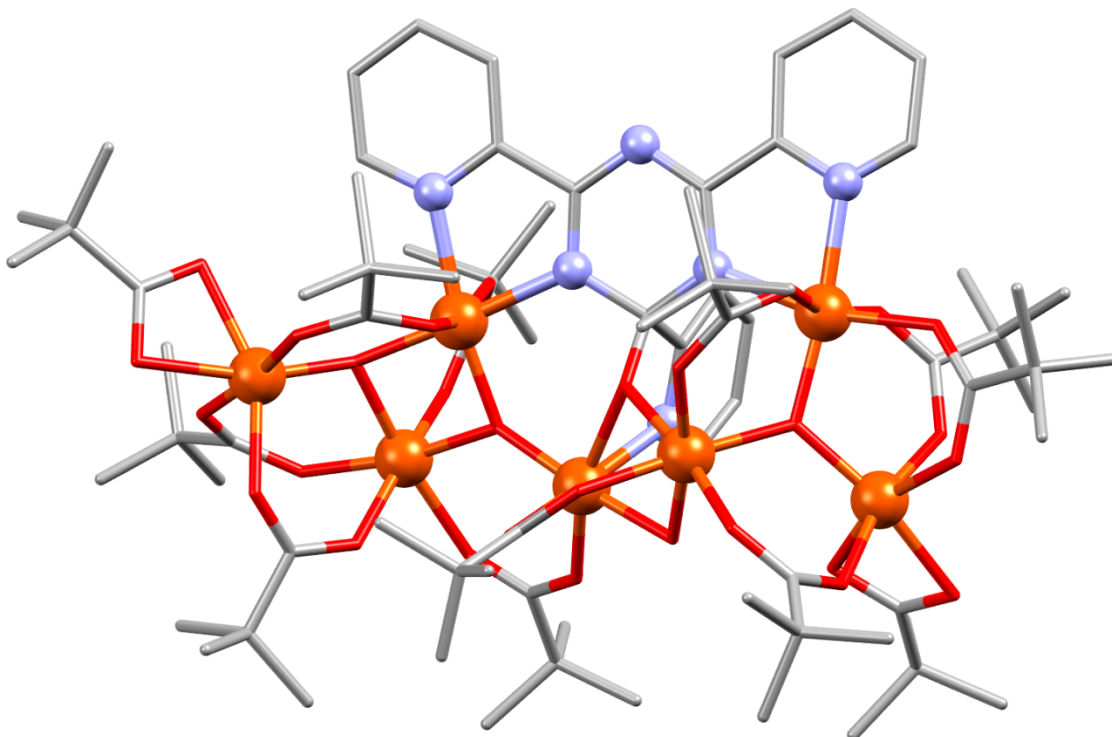

**Figure S4.** Structure of [Fe<sub>7</sub>O<sub>4</sub>(piv)<sub>12</sub>(tpt-O)] in **4a** and **4b**. Hydrogen atoms and solvent molecules are omitted for clarity.

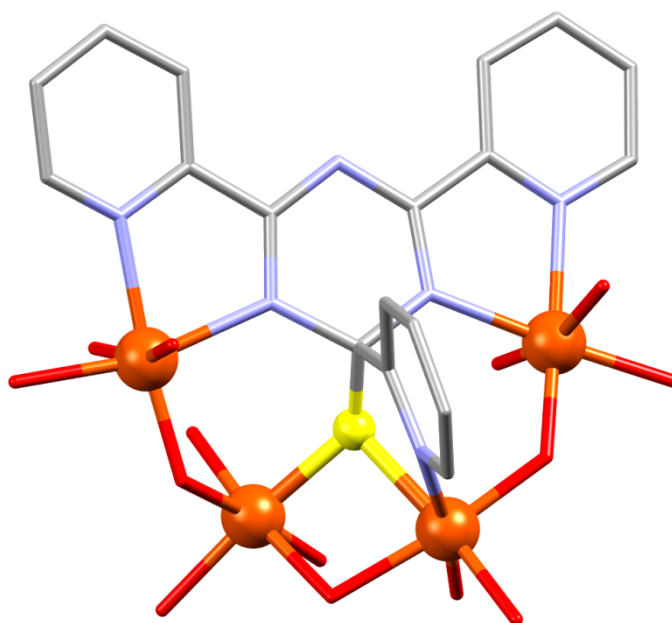

**Figure S5.** Coordination geometry of tpt-O in **4a**, **4b** and **5**.

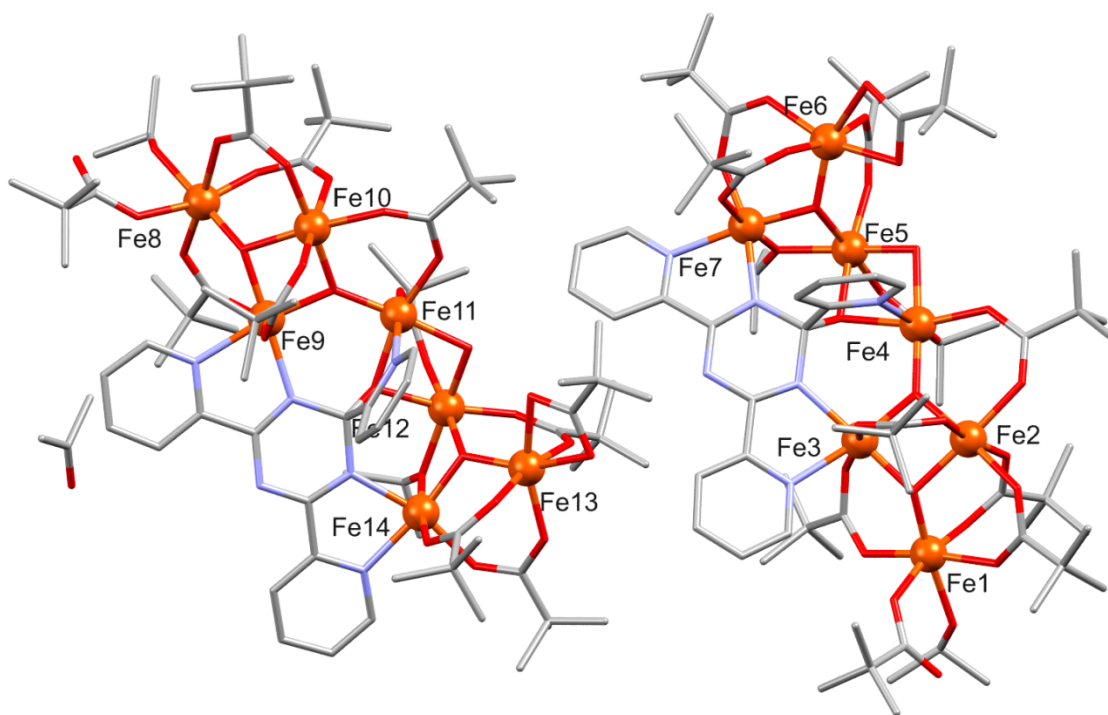

**Figure S6.** Asymmetric unit in the solid-state structure of  $[\text{Fe}_7\text{O}_4(\text{piv})_{11}(\text{tpt-O})(i\text{-PrO})(i\text{-PrOH})] \cdot 0.75(i\text{-PrOH})$  (**5**) with a partial atom numbering. Hydrogen atoms are omitted for clarity.

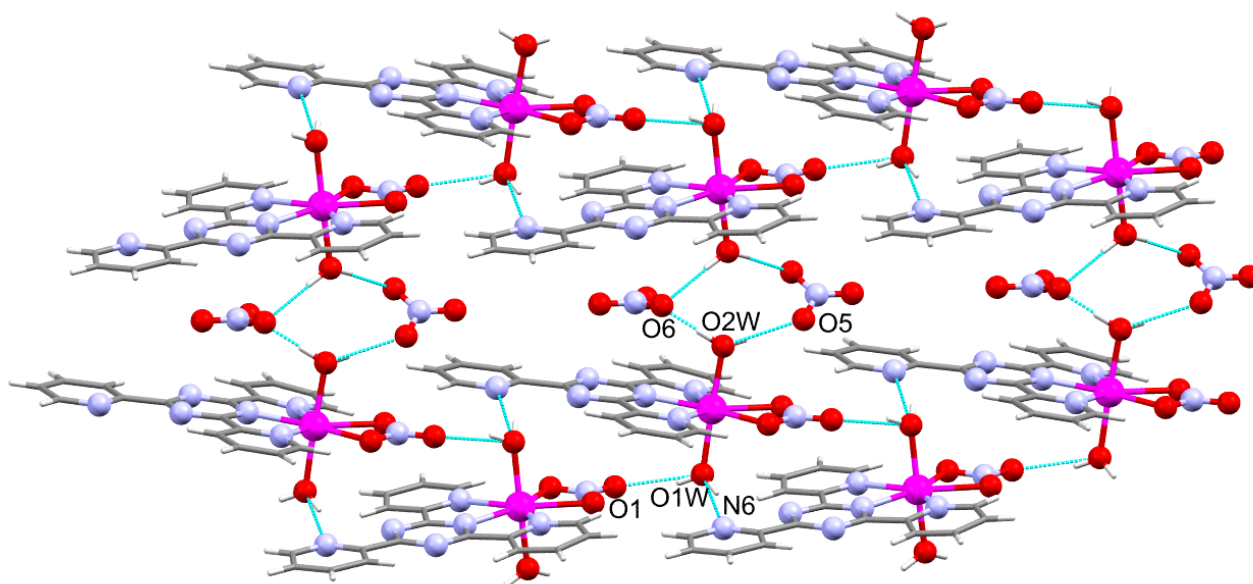

**Figure S7.** A supramolecular 2D network in  $[\text{Mn}(\text{NO}_3)(\text{tpt})(\text{H}_2\text{O})_2](\text{NO}_3)$  (**6**).

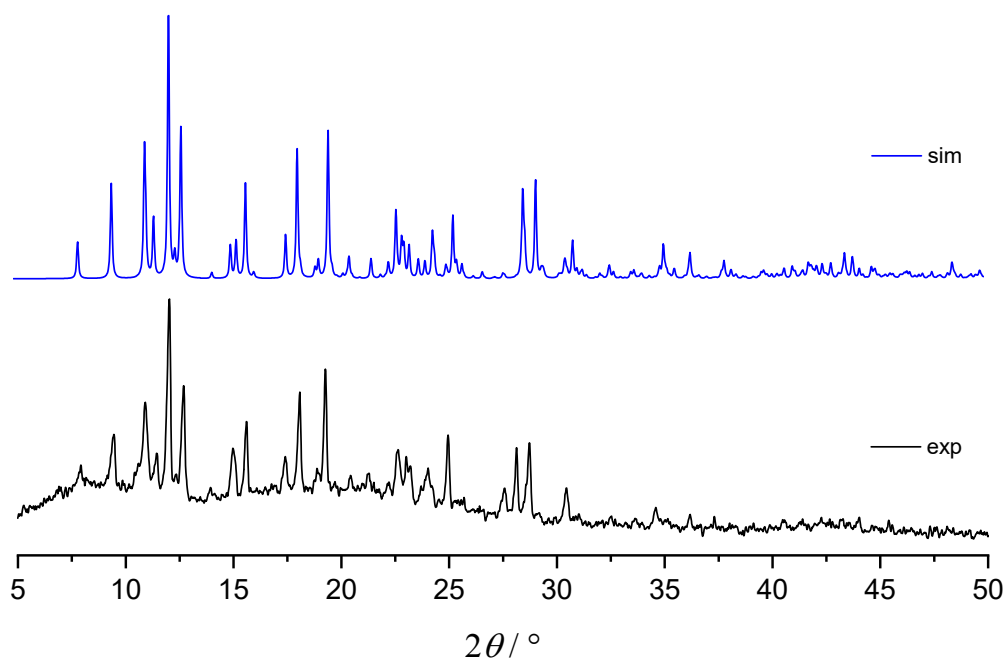

**Figure S8.** PXRD pattern of [Fe(piv)(tpt)(Cl)<sub>2</sub>] (**2**).

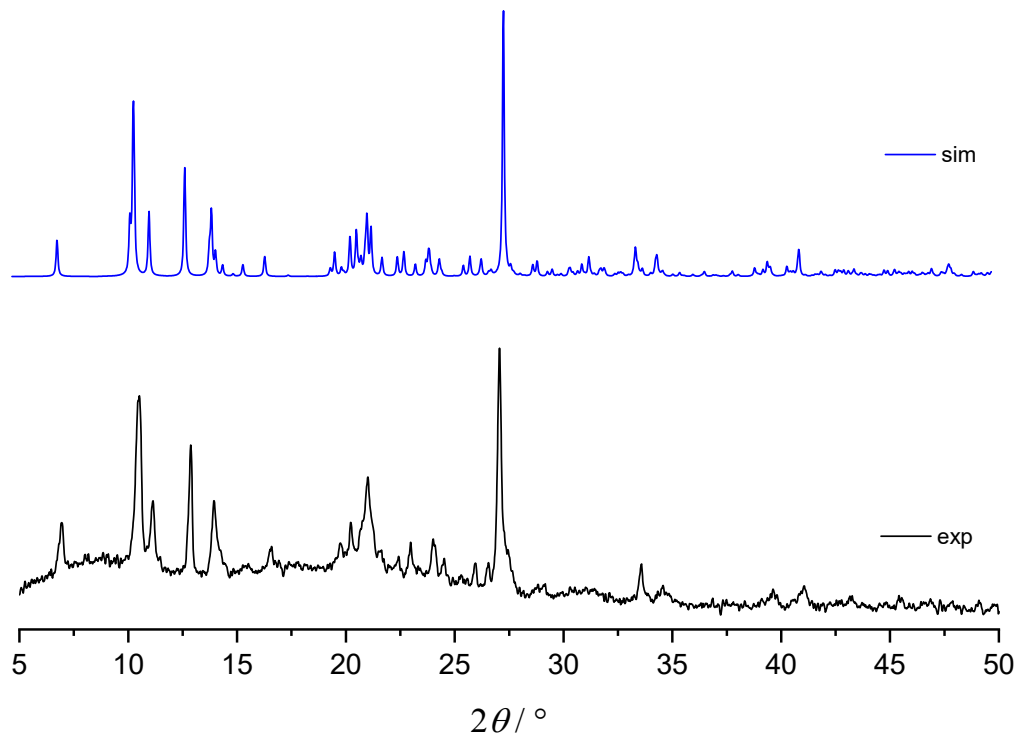

**Figure S9.** PXRD pattern of [Fe(tpt)Cl<sub>2</sub>]·2(H<sub>2</sub>O) (**3a**).

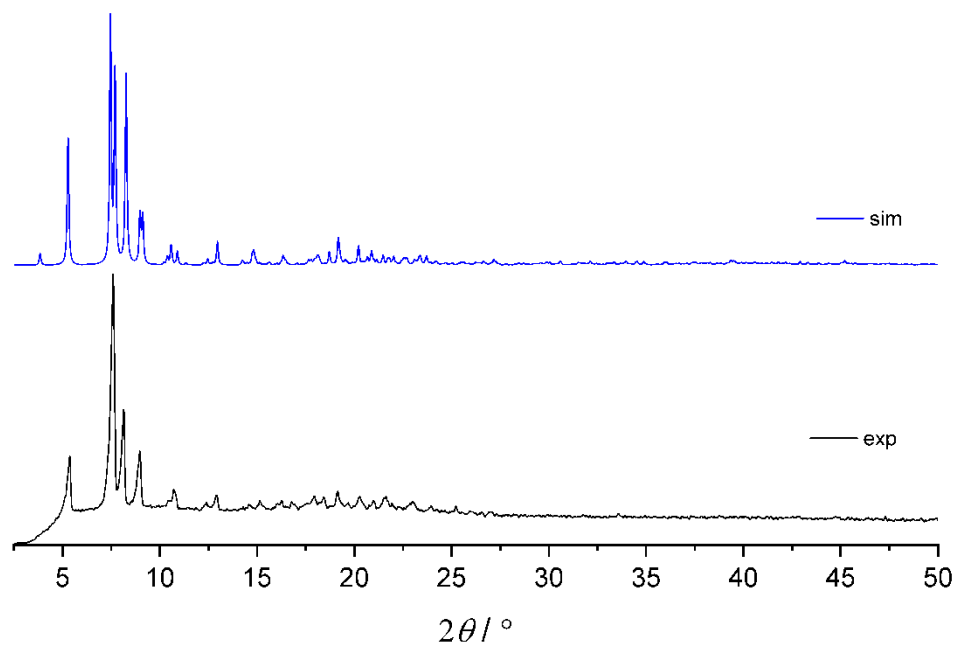

**Figure S10.** PXRD pattern of  $[\text{Fe}_7\text{O}_4(\text{piv})_{12}(\text{tpt-O})]\cdot\text{MeCN}$  (**4a**).

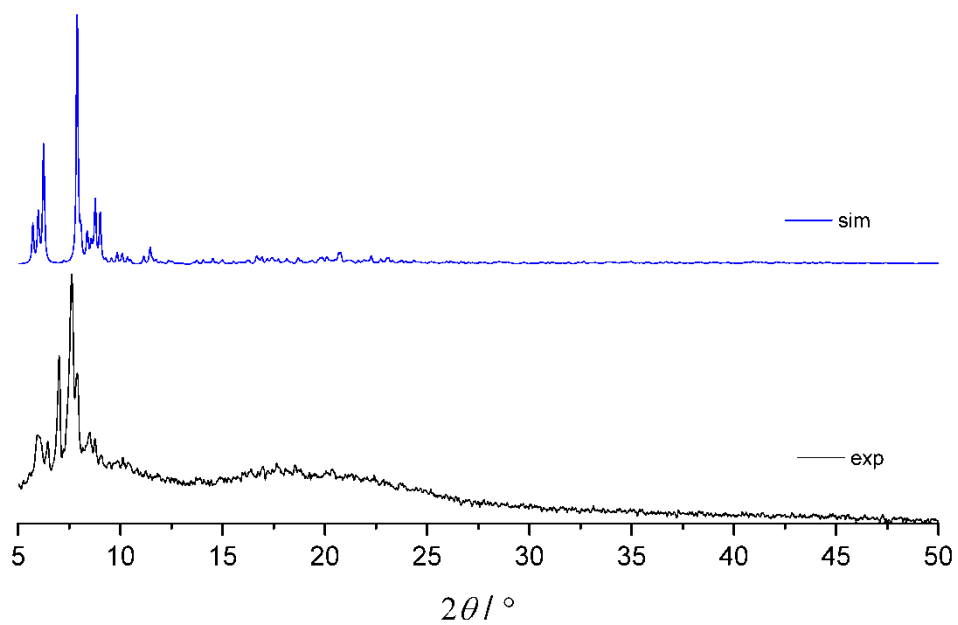

**Figure S11.** PXRD pattern of  $[\text{Fe}_7\text{O}_4(\text{piv})_{11}(\text{tpt-O})(i\text{-PrO})(i\text{-PrOH})]\cdot 0.75(i\text{-PrOH})$  (**5**).
